# Supplementary material for: Catalytic asymmetric dearomative [4 + 2] annulation of 2-nitrobenzofurans and 5H-thiazol-4-ones: stereoselective construction of dihydrobenzofuran-bridged polycyclic skeletons
Source: Royal Society of Chemistry journal article supplement (doi:10.1039/d1qo01061a), 2021-01-01
Supplement: d1qo01061a1.pdf [file d1qo01061a1.pdf]

# Catalytic asymmetric dearomative [4+2] annulation of 2-nitrobenzofurans and 5*H*-thiazol-4-ones: stereoselective construction of dihydrobenzofuran-bridged polycyclic skeletons

Jian-Qiang Zhao,<sup>a,§,\*</sup> Shun Zhou,<sup>a,b,§</sup> Zhen-Hua Wang,<sup>a</sup> Yong You,<sup>a</sup> Shuang Chen,<sup>c</sup> Xiong-Li Liu,<sup>c</sup>  
Ming-Qiang Zhou,<sup>b</sup> and Wei-Cheng Yuan<sup>a,\*</sup>

<sup>a</sup>Institute for Advanced Study, Chengdu University, Chengdu 610106, China.

<sup>b</sup>National Engineering Research Center of Chiral Drugs, Chengdu Institute of Organic Chemistry, Chinese Academy of Sciences, Chengdu, 610041, China.

<sup>c</sup>Guizhou Engineering Center for Innovative Traditional Chinese Medicine and Ethnic Medicine, Guizhou University, Guiyang, Guizhou 550025, China.

yuanwc@cioc.ac.cn

zhaojianqiang@cdu.edu.cn

## Supporting Information

### Table of Contents

|                                                                                         |     |
|-----------------------------------------------------------------------------------------|-----|
| 1. General experimental information.....                                                | S1  |
| 2. General experimental procedures for asymmetric synthesis of compounds <b>3</b> ..... | S1  |
| 3. Scale-up experiment .....                                                            | S10 |
| 4. X-Ray crystal data for compound <b>3ea</b> .....                                     | S10 |
| 5. General experimental procedures for in vitro cytotoxicity assay.....                 | S11 |
| 6. <sup>1</sup> H, <sup>13</sup> C NMR, and HPLC spectra for compounds <b>3</b> .....   | S13 |

## 1. General experimental information

Reagents were purchased from commercial sources and were used as received unless mentioned otherwise. Reactions were monitored by TLC.  $^1\text{H}$  NMR and  $^{13}\text{C}$  NMR spectra were recorded in  $\text{DMSO-}d_6$ .  $^1\text{H}$  NMR chemical shifts are reported in ppm relative to tetramethylsilane (TMS) with the solvent resonance employed as the internal standard ( $\text{DMSO-}d_6$  at 2.50 ppm). Data are reported as follows: chemical shift, multiplicity (s = singlet, br s = broad singlet, d = doublet, t = triplet, q = quartet, m = multiplet), coupling constants (Hz) and integration.  $^{13}\text{C}$  NMR chemical shifts are reported in ppm from tetramethylsilane (TMS) with the solvent resonance as the internal standard ( $\text{DMSO-}d_6$  at 39.51 ppm). Melting points were recorded on a melting point apparatus.

## 2. General experimental procedures for asymmetric synthesis of compounds 3

To a flame dried reaction tube were added 2-nitrobenzofurans **1** (0.2 mmol), 5*H*-thiazol-4-ones **2** (0.26 mmol, 1.3 equiv), **Cat. D** (20 mol%), and activated 5 Å molecular sieve (100 mg), followed by addition  $\text{CH}_2\text{Cl}_2$  (2.0 mL). The reaction solution was stirred at room temperature for specified time under a nitrogen atmosphere. After completion, the reaction mixture was directly purified by flash chromatography on silica gel (petroleum ether/ethyl acetate = 8:1 ~ 12:1) to give the corresponding products **3**.

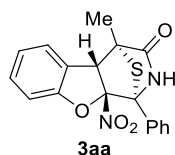

### (1*R*,4*S*,4*aS*,9*aR*)-4-methyl-9*a*-nitro-1-phenyl-1,4,4*a*,9*a*-tetrahydro-1,4-epithiobenzofuro[2,3-*c*]pyridin-3(2*H*)-one (**3aa**)

White solid, 83% yield, 58.8 mg, >20:1 dr, 94% ee; m.p. 163.1-164.0 °C,  $[\alpha]_{\text{D}}^{25} = -182.6$  (c 1.0,  $\text{CH}_2\text{Cl}_2$ ). The ee was determined by HPLC (Chiralpak IC, EtOH/hexane = 10/90, flow rate 1.0 mL/min,  $\lambda = 220$  nm,  $t_{\text{major}} = 15.79$  min,  $t_{\text{minor}} = 10.01$  min);  $^1\text{H}$  NMR (300 MHz,  $\text{DMSO-}d_6$ )  $\delta$  10.20 (s, 1H), 7.62 – 7.54 (m, 2H), 7.48 (dd,  $J = 6.9, 2.9$  Hz, 4H), 7.44 – 7.35 (m, 1H), 7.25 – 7.07 (m, 2H), 4.81 (s, 1H), 1.60 (s, 3H).  $^{13}\text{C}$  NMR (75 MHz,  $\text{DMSO-}d_6$ )  $\delta$  206.1, 176.2, 160.0, 130.4, 129.9, 129.2, 128.7, 127.1, 126.1, 125.8, 123.2, 123.0, 110.3, 81.6, 62.5, 59.5, 11.8. HRMS (ESI-TOF) Calcd. for  $\text{C}_{18}\text{H}_{15}\text{N}_2\text{O}_4\text{S}$   $[\text{M}+\text{H}]^+$ : 355.0747; found: 355.0747.

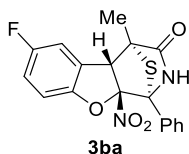

### (1*R*,4*S*,4*aS*,9*aR*)-6-fluoro-4-methyl-9*a*-nitro-1-phenyl-1,4,4*a*,9*a*-tetrahydro-1,4-epithiobenzofuro[2,3-*c*]pyridin-3(2*H*)-one (**3ba**)

Pale yellow solid, 73% yield, 54.4 mg, >20:1 dr, 94% ee; m.p. 178.5-179.5 °C,  $[\alpha]_{\text{D}}^{25} = -425.5$  (c 1.0,  $\text{CH}_2\text{Cl}_2$ ). The ee was determined by HPLC (Chiralpak IC, EtOH/hexane = 5/95, flow rate 1.0 mL/min,  $\lambda = 220$  nm,  $t_{\text{major}} = 21.78$  min,  $t_{\text{minor}} = 12.01$  min);  $^1\text{H}$  NMR (400 MHz,  $\text{DMSO-}d_6$ )  $\delta$  10.23 (s, 1H), 7.59 – 7.53 (m, 2H), 7.51 – 7.45 (m, 3H), 7.37 (dd,  $J = 8.1, 2.4$  Hz, 1H), 7.26 – 7.18 (m, 2H), 4.83 (s, 1H), 1.61 (s, 3H).  $^{13}\text{C}$  NMR (101 MHz,  $\text{DMSO-}d_6$ )  $\delta$  176.5, 159.6, 157.2, 156.7, 130.5, 129.1, 128.1 (d,  $J = 266.6$  Hz, 1C), 127.6, 125.3 (d,  $J = 9.1$  Hz, 1C), 117.3 (d,  $J = 25.2$  Hz, 1C), 113.7 (d,  $J = 26.3$  Hz, 1C), 111.6 (d,  $J = 9.0$  Hz, 1C), 82.1, 62.8, 60.0, 12.3. HRMS (ESI-TOF) Calcd. for  $\text{C}_{18}\text{H}_{13}\text{FN}_2\text{NaO}_4\text{S}$   $[\text{M}+\text{Na}]^+$ : 395.0472; found: 395.0466.

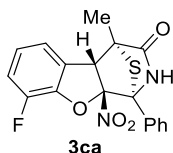

**(1R,4S,4aS,9aR)-8-fluoro-4-methyl-9a-nitro-1-phenyl-1,4,4a,9a-tetrahydro-1,4-epithiobenzofuro[2,3-c]pyridin-3(2H)-one (3ca)**

Pale yellow solid, 95% yield, 70.7 mg, >20:1 dr, 90% ee; m.p. 138.2-139.1 °C,  $[\alpha]_{\text{D}}^{25} = -538.6$  (c 1.0, CH<sub>2</sub>Cl<sub>2</sub>). The ee was determined by HPLC (Chiralpak IC, EtOH/hexane = 10/90, flow rate 1.0 mL/min,  $\lambda = 220$  nm,  $t_{\text{major}} = 23.51$  min,  $t_{\text{minor}} = 14.52$  min); <sup>1</sup>H NMR (400 MHz, DMSO-*d*<sub>6</sub>)  $\delta$  10.25 (s, 1H), 7.55 (dd,  $J = 6.8, 3.1$  Hz, 2H), 7.52 – 7.46 (m, 3H), 7.39 – 7.27 (m, 2H), 7.18 – 7.11 (m, 1H), 4.92 (s, 1H), 1.59 (s, 3H). <sup>13</sup>C NMR (101 MHz, DMSO-*d*<sub>6</sub>)  $\delta$  176.4, 146.7 (d,  $J = 11.1$  Hz, 1C) 146.5 (d,  $J = 247.4$  Hz, 1C), 130.6, 129.2, 127.5, 127.4, 126.6, 124.5 (d,  $J = 5.0$  Hz, 1C), 122.4, 122.3, 117.9 (d,  $J = 16.2$  Hz, 1C), 82.2, 62.9, 60.4, 55.4, 12.3. HRMS (ESI-TOF) Calcd. for C<sub>18</sub>H<sub>13</sub>FN<sub>2</sub>NaO<sub>4</sub>S [M+Na]<sup>+</sup>: 395.0472; found: 395.0465.

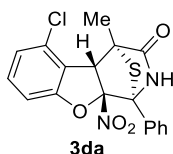

**(1R,4S,4aS,9aR)-5-chloro-4-methyl-9a-nitro-1-phenyl-1,4,4a,9a-tetrahydro-1,4-epithiobenzofuro[2,3-c]pyridin-3(2H)-one (3da)**

Pale yellow solid, 90% yield, 70.0 mg, >20:1 dr, 84% ee; m.p. 144.3-145.2 °C,  $[\alpha]_{\text{D}}^{25} = -345.6$  (c 1.0, CH<sub>2</sub>Cl<sub>2</sub>). The ee was determined by HPLC (Chiralpak IC, *i*PrOH/hexane = 5/95, flow rate 1.0 mL/min,  $\lambda = 220$  nm,  $t_{\text{major}} = 9.46$  min,  $t_{\text{minor}} = 7.60$  min); <sup>1</sup>H NMR (400 MHz, DMSO-*d*<sub>6</sub>)  $\delta$  10.32 (s, 1H), 7.59 – 7.52 (m, 2H), 7.51 – 7.43 (m, 3H), 7.44 – 7.36 (m, 1H), 7.27 – 7.14 (m, 2H), 4.84 (s, 1H), 1.64 (s, 3H). <sup>13</sup>C NMR (101 MHz, DMSO-*d*<sub>6</sub>)  $\delta$  176.2, 161.4, 132.7, 130.8, 130.6, 129.2, 129.1, 127.6, 125.7, 124.5, 122.4, 110.1, 81.9, 64.8, 60.1, 14.8. HRMS (ESI-TOF) Calcd. for C<sub>18</sub>H<sub>13</sub>ClN<sub>2</sub>NaO<sub>4</sub>S [M+Na]<sup>+</sup>: 411.0177; found: 411.0159.

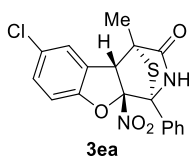

**(1R,4S,4aS,9aR)-6-chloro-4-methyl-9a-nitro-1-phenyl-1,4,4a,9a-tetrahydro-1,4-epithiobenzofuro[2,3-c]pyridin-3(2H)-one (3ea)**

White solid, 75% yield, 58.3 mg, >20:1 dr, 93% ee; m.p. 155.3-156.2 °C,  $[\alpha]_{\text{D}}^{25} = -419.1$  (c 1.0, CH<sub>2</sub>Cl<sub>2</sub>). The ee was determined by HPLC (Chiralpak IC, EtOH/hexane = 10/90, flow rate 1.0 mL/min,  $\lambda = 220$  nm,  $t_{\text{major}} = 11.11$  min,  $t_{\text{minor}} = 7.89$  min); <sup>1</sup>H NMR (400 MHz, DMSO-*d*<sub>6</sub>)  $\delta$  10.25 (s, 1H), 7.61 – 7.54 (m, 3H), 7.53 – 7.47 (m, 3H), 7.45 (dd,  $J = 8.6, 2.3$  Hz, 1H), 7.23 (d,  $J = 8.6$  Hz, 1H), 4.85 (s, 1H), 1.62 (s, 3H). <sup>13</sup>C NMR (101 MHz, DMSO-*d*<sub>6</sub>)  $\delta$  176.4, 159.3, 130.7, 130.5, 129.3, 129.2, 127.5, 127.3, 126.5, 126.4, 126.0, 112.3, 82.1, 62.8, 59.8, 12.3. HRMS (ESI-TOF) Calcd. for C<sub>18</sub>H<sub>13</sub>ClN<sub>2</sub>NaO<sub>4</sub>S [M+Na]<sup>+</sup>: 411.0177; found: 411.0161.

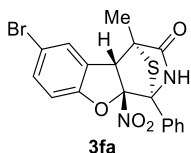

**(1R,4S,4aS,9aR)-6-bromo-4-methyl-9a-nitro-1-phenyl-1,4,4a,9a-tetrahydro-1,4-epithiobenzofuro[2,3-c]pyridin-3(2H)-one (3fa)**

White solid, 86% yield, 74.5 mg, >20:1 dr, 91% ee; m.p. 149.3-150.3 °C,  $[\alpha]_{\text{D}}^{25} = -444.4$  (c 1.0, CH<sub>2</sub>Cl<sub>2</sub>); The ee was determined by HPLC (Chiralpak IC, EtOH/hexane = 10/90, flow rate 1.0 mL/min,  $\lambda = 220$  nm,  $t_{\text{major}} = 10.66$  min,  $t_{\text{minor}} = 8.61$  min); <sup>1</sup>H NMR (400 MHz, DMSO-*d*<sub>6</sub>)  $\delta$  10.25 (s, 1H), 7.68 (d,  $J = 2.1$  Hz, 1H), 7.61 – 7.54 (m, 3H), 7.53 – 7.45 (m, 3H), 7.18 (d,  $J = 8.6$  Hz, 1H), 4.86 (s, 1H), 1.61 (s, 3H). <sup>13</sup>C NMR (101 MHz, DMSO-*d*<sub>6</sub>)  $\delta$  176.4, 159.8, 133.5, 130.5, 129.3, 129.2, 129.1, 127.6, 126.5, 126.4, 114.9, 112.8, 82.1, 62.8, 59.8, 12.3. HRMS (ESI-TOF) Calcd. for C<sub>18</sub>H<sub>13</sub><sup>79</sup>BrN<sub>2</sub>NaO<sub>4</sub>S [M+Na]<sup>+</sup>: 454.9672; found: 454.9653; For C<sub>18</sub>H<sub>13</sub><sup>81</sup>BrN<sub>2</sub>NaO<sub>4</sub>S [M+Na]<sup>+</sup>: 456.9651; found: 454.9630.

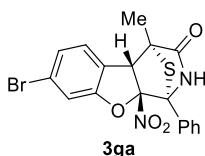

**(1R,4S,4aS,9aR)-7-bromo-4-methyl-9a-nitro-1-phenyl-1,4,4a,9a-tetrahydro-1,4-epithiobenzofuro[2,3-c]pyridin-3(2H)-one (3ga)**

White solid, 86% yield, 74.5 mg, >20:1 dr, 92% ee; m.p. 161.8-162.8 °C,  $[\alpha]_{\text{D}}^{25} = -597.1$  (c 1.0, CH<sub>2</sub>Cl<sub>2</sub>). The ee was determined by HPLC (Chiralpak IC, EtOH/hexane = 10/90, flow rate 1.0 mL/min,  $\lambda = 220$  nm,  $t_{\text{major}} = 28.17$  min,  $t_{\text{minor}} = 15.67$  min); <sup>1</sup>H NMR (400 MHz, DMSO-*d*<sub>6</sub>)  $\delta$  10.24 (s, 1H), 7.60 – 7.54 (m, 2H), 7.53 – 7.47 (m, 4H), 7.43 (d,  $J = 8.1$  Hz, 1H), 7.35 (dd,  $J = 8.0$ , 1.8 Hz, 1H), 4.81 (s, 1H), 1.59 (s, 3H). <sup>13</sup>C NMR (101 MHz, DMSO-*d*<sub>6</sub>)  $\delta$  176.4, 161.2, 130.5, 129.3, 129.1, 128.0, 127.6, 126.5, 126.4, 123.5, 123.0, 114.1, 82.1, 62.8, 59.5, 12.2. HRMS (ESI-TOF) Calcd. for C<sub>18</sub>H<sub>13</sub><sup>79</sup>BrN<sub>2</sub>NaO<sub>4</sub>S [M+Na]<sup>+</sup>: 454.9672; found: 454.9662; For C<sub>18</sub>H<sub>13</sub><sup>81</sup>BrN<sub>2</sub>NaO<sub>4</sub>S [M+Na]<sup>+</sup>: 456.9651; found: 454.9642.

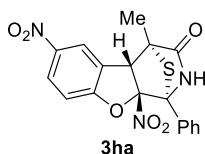

**(1R,4S,4aS,9aR)-4-methyl-6,9a-dinitro-1-phenyl-1,4,4a,9a-tetrahydro-1,4-epithiobenzofuro[2,3-c]pyridin-3(2H)-one (3ha)**

Yellow solid, 72% yield, 57.6 mg, >20:1 dr, 88% ee; m.p. 222.8-223.5 °C,  $[\alpha]_{\text{D}}^{25} = -47.9$  (c 0.5, CH<sub>2</sub>Cl<sub>2</sub>). The ee was determined by HPLC (Chiralpak IC, EtOH/hexane = 30/70, flow rate 1.0 mL/min,  $\lambda = 220$  nm,  $t_{\text{major}} = 9.73$  min,  $t_{\text{minor}} = 10.65$  min); <sup>1</sup>H NMR (400 MHz, DMSO-*d*<sub>6</sub>)  $\delta$  10.30 (s, 1H), 8.39 – 8.28 (m, 2H), 7.56 – 7.52 (m, 2H), 7.51 – 7.47 (m, 3H), 7.44 (d,  $J = 8.7$  Hz, 1H), 4.95 (s, 1H), 1.64 (s, 3H). <sup>13</sup>C NMR (101 MHz, DMSO-*d*<sub>6</sub>)  $\delta$  176.2, 164.8, 143.8, 130.7, 129.7, 129.2, 129.0, 128.4, 127.7, 127.5, 126.7, 125.9, 122.6, 111.4, 82.3, 62.9, 59.2, 12.1. HRMS (ESI-TOF) Calcd. for C<sub>18</sub>H<sub>13</sub>N<sub>3</sub>NaO<sub>6</sub>S [M+Na]<sup>+</sup>: 422.0417; found: 422.0403.

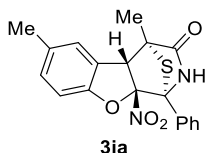

**(1R,4S,4aS,9aR)-4,6-dimethyl-9a-nitro-1-phenyl-1,4,4a,9a-tetrahydro-1,4-epithiobenzofuro[2,3-c]pyridin-3(2H)-one (3ia)**

White solid, 64% yield, 47.2 mg, >20:1 dr, 89% ee; m.p. 193.1-193.8 °C,  $[\alpha]_D^{25} = -350.3$  (c 1.0, CH<sub>2</sub>Cl<sub>2</sub>); The ee was determined by HPLC (Chiralpak IC, iPrOH/hexane = 10/90, flow rate 1.0 mL/min,  $\lambda = 220$  nm,  $t_{\text{major}} = 15.27$  min,  $t_{\text{minor}} = 9.51$  min); <sup>1</sup>H NMR (400 MHz, DMSO-*d*<sub>6</sub>)  $\delta$  10.19 (s, 1H), 7.58 (dd,  $J = 6.8, 2.9$  Hz, 2H), 7.52 – 7.46 (m, 3H), 7.28 (d,  $J = 1.8$  Hz, 1H), 7.19 (dd,  $J = 8.3, 1.9$  Hz, 1H), 7.05 (d,  $J = 8.2$  Hz, 1H), 4.76 (s, 1H), 2.32 (s, 3H), 1.61 (s, 3H). <sup>13</sup>C NMR (101 MHz, DMSO-*d*<sub>6</sub>)  $\delta$  176.7, 158.6, 132.6, 131.1, 130.4, 129.7, 129.1, 127.6, 126.8, 126.5, 123.6, 110.3, 82.0, 62.9, 60.0, 20.9, 12.4. HRMS (ESI-TOF) Calcd. for C<sub>19</sub>H<sub>16</sub>N<sub>2</sub>NaO<sub>4</sub>S [M+Na]<sup>+</sup>: 391.0723; found: 391.0706.

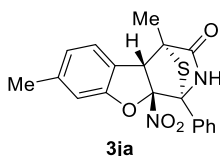

**(1R,4S,4aS,9aR)-4,7-dimethyl-9a-nitro-1-phenyl-1,4,4a,9a-tetrahydro-1,4-epithiobenzofuro[2,3-c]pyridin-3(2H)-one (3ja)**

White solid, 66% yield, 48.7 mg, >20:1 dr, 89% ee; m.p. 140.2-140.9 °C,  $[\alpha]_D^{25} = -284.3$  (c 1.0, CH<sub>2</sub>Cl<sub>2</sub>). The ee was determined by HPLC (Chiralpak IC, EtOH/hexane = 10/90, flow rate 1.0 mL/min,  $\lambda = 220$  nm,  $t_{\text{major}} = 10.12$  min,  $t_{\text{minor}} = 7.33$  min); <sup>1</sup>H NMR (400 MHz, DMSO-*d*<sub>6</sub>)  $\delta$  10.18 (s, 1H), 7.58 (dd,  $J = 6.8, 3.0$  Hz, 2H), 7.53 – 7.45 (m, 3H), 7.35 (d,  $J = 7.7$  Hz, 1H), 7.01 (s, 1H), 6.96 (d,  $J = 7.7$  Hz, 1H), 4.74 (s, 1H), 2.34 (s, 3H), 1.58 (s, 3H). <sup>13</sup>C NMR (101 MHz, DMSO-*d*<sub>6</sub>)  $\delta$  176.7, 160.8, 141.0, 130.4, 129.7, 129.1, 127.5, 126.5, 126.1, 124.1, 120.7, 111.2, 82.0, 63.0, 59.8, 21.6, 12.3. HRMS (ESI-TOF) Calcd. for C<sub>19</sub>H<sub>16</sub>N<sub>2</sub>NaO<sub>4</sub>S [M+Na]<sup>+</sup>: 391.0723; found: 391.0710.

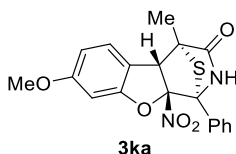

**(1R,4S,4aS,9aR)-7-methoxy-4-methyl-9a-nitro-1-phenyl-1,4,4a,9a-tetrahydro-1,4-epithiobenzofuro[2,3-c]pyridin-3(2H)-one (3ka)**

White solid, 62% yield, 47.6 mg, >20:1 dr, 89% ee; m.p. 188.7 - 189.5 °C,  $[\alpha]_D^{25} = -219.5$  (c 1.0, CH<sub>2</sub>Cl<sub>2</sub>). The ee was determined by HPLC (Chiralpak IC, EtOH/hexane = 10/90, flow rate 1.0 mL/min,  $\lambda = 220$  nm,  $t_{\text{major}} = 12.69$  min,  $t_{\text{minor}} = 9.04$  min); <sup>1</sup>H NMR (400 MHz, DMSO-*d*<sub>6</sub>)  $\delta$  10.16 (s, 1H), 7.57 (dd,  $J = 6.8, 3.0$  Hz, 2H), 7.52 – 7.46 (m, 3H), 7.35 (d,  $J = 8.4$  Hz, 1H), 6.84 (d,  $J = 2.3$  Hz, 1H), 6.70 (dd,  $J = 8.4, 2.3$  Hz, 1H), 4.70 (s, 1H), 3.78 (s, 3H), 1.57 (s, 3H). <sup>13</sup>C NMR (101 MHz, DMSO-*d*<sub>6</sub>)  $\delta$  176.7, 162.0, 161.8, 130.4, 129.6, 129.1, 127.5, 127.0, 126.7, 115.2, 109.7, 97.0, 81.9, 63.1, 59.6, 56.2, 12.2. HRMS (ESI-TOF) Calcd. for C<sub>19</sub>H<sub>16</sub>N<sub>2</sub>NaO<sub>5</sub>S [M+Na]<sup>+</sup>: 407.0672; found: 407.0656.

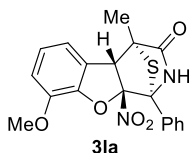

**(1R,4S,4aS,9aR)-8-methoxy-4-methyl-9a-nitro-1-phenyl-1,4,4a,9a-tetrahydro-1,4-epithiobenzofuro[2,3-c]pyridin-3(2H)-one (3la)**

White solid, 73% yield, 56.1 mg, >20:1 dr, 98% ee; m.p. 186.2-187.0 °C,  $[\alpha]_D^{25} = -391.8$  (c 1.0, CH<sub>2</sub>Cl<sub>2</sub>). The ee was determined by HPLC (Chiralpak IC, EtOH/hexane = 10/90, flow rate 1.0 mL/min,  $\lambda = 220$  nm,  $t_{\text{major}} = 12.43$  min,  $t_{\text{minor}} = 19.72$  min); <sup>1</sup>H NMR (600 MHz, DMSO-*d*<sub>6</sub>)  $\delta$  10.17 (s, 1H), 7.57 – 7.49 (m, 2H), 7.48 – 7.43 (m, 3H), 7.08 – 7.03 (m, 2H), 7.00 (dd,  $J = 6.1, 2.5$  Hz, 1H), 4.78 (s, 1H), 3.80 (s, 3H), 1.55 (s, 3H). <sup>13</sup>C NMR (151 MHz, DMSO-*d*<sub>6</sub>)  $\delta$  176.7, 148.8, 144.5, 130.5, 129.7, 129.2, 127.6, 126.6, 124.8, 124.3, 118.0, 114.3, 82.1, 63.0, 60.6, 56.5, 12.5. HRMS (ESI-TOF) Calcd. for C<sub>19</sub>H<sub>16</sub>N<sub>2</sub>NaO<sub>5</sub>S [M+Na]<sup>+</sup>: 407.0672; found: 407.0661.

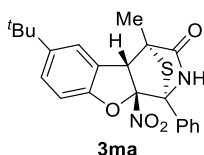

**(1R,4S,4aS,9aR)-6-(tert-butyl)-4-methyl-9a-nitro-1-phenyl-1,4,4a,9a-tetrahydro-1,4-epithiobenzofuro[2,3-c]pyridin-3(2H)-one (3ma)**

White solid, 54% yield, 44.3 mg, >20:1 dr, 89% ee; m.p. 177.4-178.3 °C,  $[\alpha]_D^{25} = -214.1$  (c 1.0, CH<sub>2</sub>Cl<sub>2</sub>). The ee was determined by HPLC (Chiralpak IC, <sup>i</sup>PrOH/hexane = 5/95, flow rate 1.0 mL/min,  $\lambda = 220$  nm,  $t_{\text{major}} = 11.02$  min,  $t_{\text{minor}} = 8.88$  min); <sup>1</sup>H NMR (400 MHz, DMSO-*d*<sub>6</sub>)  $\delta$  10.19 (s, 1H), 7.62 – 7.55 (m, 2H), 7.49 (dd,  $J = 4.3, 2.3$  Hz, 4H), 7.41 (dd,  $J = 8.5, 2.1$  Hz, 1H), 7.09 (d,  $J = 8.6$  Hz, 1H), 4.76 (s, 1H), 1.61 (s, 3H), 1.30 (s, 9H). <sup>13</sup>C NMR (101 MHz, DMSO-*d*<sub>6</sub>)  $\delta$  176.7, 158.5, 146.1, 130.4, 129.9, 129.7, 129.1, 127.6, 127.5, 126.6, 123.4, 123.3, 109.9, 81.9, 62.9, 60.1, 34.8, 31.8, 12.4. HRMS (ESI-TOF) Calcd. for C<sub>22</sub>H<sub>22</sub>N<sub>2</sub>NaO<sub>5</sub>S [M+Na]<sup>+</sup>: 433.1192; found: 433.1181.

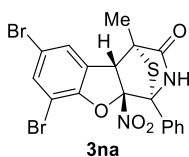

**(1R,4S,4aS,9aR)-6,8-dibromo-4-methyl-9a-nitro-1-phenyl-1,4,4a,9a-tetrahydro-1,4-epithiobenzofuro[2,3-c]pyridin-3(2H)-one (3na)**

Yellow solid, 94% yield, 96.0 mg, >20:1 dr, 93% ee; m.p. 160.9-161.8 °C,  $[\alpha]_D^{25} = -160.4$  (c 1.0, CH<sub>2</sub>Cl<sub>2</sub>). The ee was determined by HPLC (Chiralpak IC, EtOH/hexane = 10/90, flow rate 1.0 mL/min,  $\lambda = 220$  nm,  $t_{\text{major}} = 14.17$  min,  $t_{\text{minor}} = 23.12$  min); <sup>1</sup>H NMR (300 MHz, DMSO-*d*<sub>6</sub>)  $\delta$  10.29 (s, 1H), 7.88 (d,  $J = 1.9$  Hz, 1H), 7.72 – 7.65 (m, 1H), 7.58 (dd,  $J = 6.8, 3.0$  Hz, 2H), 7.54 – 7.45 (m, 3H), 4.97 (s, 1H), 1.59 (s, 3H). <sup>13</sup>C NMR (75 MHz, DMSO-*d*<sub>6</sub>)  $\delta$  175.6, 156.8, 134.8, 130.1, 128.7, 128.0, 127.1, 127.0, 124.9, 114.8, 103.1, 81.5, 62.5, 60.2, 11.8. HRMS (ESI-TOF) Calcd. for C<sub>18</sub>H<sub>12</sub><sup>79</sup>Br<sub>2</sub>N<sub>2</sub>NaO<sub>4</sub>S [M+Na]<sup>+</sup>: 532.8777; found: 532.8777; For C<sub>18</sub>H<sub>12</sub><sup>79</sup>Br<sup>81</sup>BrN<sub>2</sub>NaO<sub>4</sub>S [M+Na]<sup>+</sup>: 534.8756; found: 534.8757; for C<sub>18</sub>H<sub>12</sub><sup>81</sup>Br<sub>2</sub>N<sub>2</sub>NaO<sub>4</sub>S [M+Na]<sup>+</sup>: 536.8736; found: 536.8741.

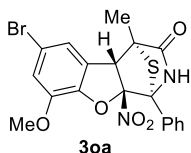

**(1R,4S,4aS,9aR)-6-bromo-8-methoxy-4-methyl-9a-nitro-1-phenyl-1,4,4a,9a-tetrahydro-1,4-epithiobenzofuro[2,3-c]pyridin-3(2H)-one (3oa)**

Pale yellow solid, 85% yield, 78.8 mg, >20:1 dr, 91% ee; m.p. 156.9-157.7 °C,  $[\alpha]_D^{25} = -285.5$  (c 1.0, CH<sub>2</sub>Cl<sub>2</sub>). The ee was determined by HPLC (Chiralpak IC, iPrOH/hexane = 5/95, flow rate 1.0 mL/min,  $\lambda = 220$  nm,  $t_{\text{major}} = 32.45$  min,  $t_{\text{minor}} = 39.30$  min); <sup>1</sup>H NMR (400 MHz, DMSO-*d*<sub>6</sub>)  $\delta$  10.21 (s, 1H), 7.55 – 7.50 (m, 2H), 7.50 – 7.45 (m, 3H), 7.32 – 7.21 (m, 2H), 4.83 (s, 1H), 3.85 (s, 3H), 1.57 (s, 3H). <sup>13</sup>C NMR (101 MHz, DMSO-*d*<sub>6</sub>)  $\delta$  176.6, 148.7, 144.4, 130.4, 130.0, 129.6, 129.1, 129.0, 127.6, 126.5, 124.8, 124.2, 118.0, 114.3, 82.0, 62.9, 60.5, 56.4, 12.4. HRMS (ESI-TOF) Calcd. for C<sub>19</sub>H<sub>15</sub><sup>79</sup>BrN<sub>2</sub>NaO<sub>5</sub>S [M+Na]<sup>+</sup>: 484.9777; found: 484.9764; For C<sub>19</sub>H<sub>15</sub><sup>81</sup>BrN<sub>2</sub>NaO<sub>5</sub>S [M+Na]<sup>+</sup>: 486.9757; found: 486.9739.

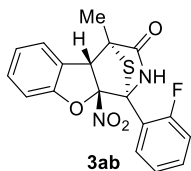

**(1R,4S,4aS,9aR)-1-(2-fluorophenyl)-4-methyl-9a-nitro-1,4,4a,9a-tetrahydro-1,4-epithiobenzofuro[2,3-c]pyridin-3(2H)-one (3ab)**

White solid, 41% yield, 30.6 mg, >20:1 dr, 89% ee; m.p. 160.7-161.5 °C,  $[\alpha]_D^{25} = -171.5$  (c 0.5, CH<sub>2</sub>Cl<sub>2</sub>). The ee was determined by HPLC (Chiralpak IC, EtOH/hexane = 10/90, flow rate 1.0 mL/min,  $\lambda = 220$  nm,  $t_{\text{major}} = 23.50$  min,  $t_{\text{minor}} = 14.23$  min); <sup>1</sup>H NMR (300 MHz, DMSO-*d*<sub>6</sub>)  $\delta$  10.05 (s, 1H), 7.56 (dd,  $J = 14.6, 7.4$  Hz, 2H), 7.47 (d,  $J = 7.7$  Hz, 1H), 7.41 – 7.31 (m, 3H), 7.17 – 7.10 (m, 2H), 4.80 (s, 1H), 1.59 (s, 3H). <sup>13</sup>C NMR (151 MHz, DMSO-*d*<sub>6</sub>)  $\delta$  176.2, 160.6 (d,  $J = 250.7$  Hz, 1C), 160.5, 133.2 (d,  $J = 9.1$  Hz, 1C), 130.8, 130.4 (d,  $J = 3.0$  Hz, 1C), 126.5, 125.7, 125.2 (d,  $J = 4.5$  Hz, 1C), 123.7, 123.4, 117.2 (d,  $J = 22.6$  Hz, 1C), 116.5 (d,  $J = 10.6$  Hz, 1C), 110.7, 79.8 (d,  $J = 3.0$  Hz, 1C), 62.4, 59.9, 12.2. HRMS (ESI-TOF) Calcd. for C<sub>18</sub>H<sub>14</sub>FN<sub>2</sub>O<sub>4</sub>S [M+H]<sup>+</sup>: 373.0653; found: 373.0652.

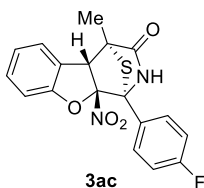

**(1R,4S,4aS,9aR)-1-(4-fluorophenyl)-4-methyl-9a-nitro-1,4,4a,9a-tetrahydro-1,4-epithiobenzofuro[2,3-c]pyridin-3(2H)-one (3ac)**

white solid, 47% yield, 35.0 mg, >20:1 dr, 93% ee; m.p. 173.4-174.1 °C,  $[\alpha]_D^{25} = -64.2$  (c 0.5, CH<sub>2</sub>Cl<sub>2</sub>). The ee was determined by HPLC (Chiralpak IC, EtOH/hexane = 20/80, flow rate 1.0 mL/min,  $\lambda = 220$  nm,  $t_{\text{major}} = 11.64$  min,  $t_{\text{minor}} = 16.50$  min); <sup>1</sup>H NMR (300 MHz, DMSO-*d*<sub>6</sub>)  $\delta$  10.16 (s, 1H), 7.53 – 7.44 (m, 3H), 7.43 – 7.35 (m, 1H), 7.20 – 7.11 (m, 2H), 7.06 – 7.01 (m, 2H), 4.79 (s, 1H), 1.58 (s, 3H). <sup>13</sup>C NMR (151 MHz, DMSO-*d*<sub>6</sub>)  $\delta$  176.6, 163.3 (d,  $J = 249.2$  Hz, 1C), 160.4, 130.8, 130.0 (d,  $J = 9.1$  Hz, 2C), 126.6, 126.2, 126.0 (d,  $J = 3.0$  Hz, 1C), 123.6, 123.5,

116.2 (d,  $J = 22.6$  Hz, 2C), 110.7, 81.3, 63.1, 59.8, 12.3. HRMS (ESI-TOF) Calcd. for  $C_{18}H_{14}FN_2O_4S$   $[M+H]^+$ : 373.0653; found: 373.0662.

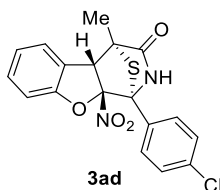

**(1R,4S,4aS,9aR)-1-(4-chlorophenyl)-4-methyl-9a-nitro-1,4,4a,9a-tetrahydro-1,4-epithiobenzofuro[2,3-c]pyridin-3(2H)-one (3ad)**

White solid, 58% yield, 45.2 mg, >20:1 dr, 98% ee; m.p. 186.0-186.7 °C,  $[\alpha]_D^{25} = -389.3$  (c 0.5,  $CH_2Cl_2$ ). The ee was determined by HPLC (Chiralpak IC, EtOH/hexane = 10/90, flow rate 1.0 mL/min,  $\lambda = 220$  nm,  $t_{major} = 13.93$  min,  $t_{minor} = 8.09$  min);  $^1H$  NMR (400 MHz,  $DMSO-d_6$ )  $\delta$  10.25 (s, 1H), 7.66 – 7.56 (m, 4H), 7.53 – 7.46 (m, 1H), 7.45 – 7.37 (m, 1H), 7.22 – 7.12 (m, 2H), 4.85 (s, 1H), 1.60 (s, 3H).  $^{13}C$  NMR (101 MHz,  $DMSO-d_6$ )  $\delta$  176.6, 160.5, 135.3, 130.9, 129.5, 129.2, 128.7, 126.6, 126.2, 123.6, 123.5, 110.8, 81.2, 63.1, 59.8, 12.3. HRMS (ESI-TOF) Calcd. for  $C_{18}H_{14}ClN_2O_4S$   $[M+H]^+$ : 389.0357; found: 389.0364.

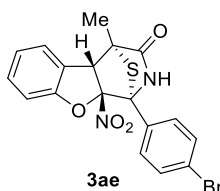

**(1R,4S,4aS,9aR)-1-(4-bromophenyl)-4-methyl-9a-nitro-1,4,4a,9a-tetrahydro-1,4-epithiobenzofuro[2,3-c]pyridin-3(2H)-one (3ae)**

White solid, 58% yield, 50.3 mg, >20:1 dr, 96% ee; m.p. 175.7-176.6 °C,  $[\alpha]_D^{25} = -37.8$  (c 0.5,  $CH_2Cl_2$ ). The ee was determined by HPLC (Chiralpak IC, EtOH/hexane = 10/90, flow rate 1.0 mL/min,  $\lambda = 220$  nm,  $t_{major} = 11.44$  min,  $t_{minor} = 9.76$  min);  $^1H$  NMR (300 MHz,  $DMSO-d_6$ )  $\delta$  10.25 (s, 1H), 7.79 – 7.67 (m, 2H), 7.58 – 7.45 (m, 3H), 7.44 – 7.35 (m, 1H), 7.22 – 7.08 (m, 2H), 4.84 (s, 1H), 1.59 (s, 3H).  $^{13}C$  NMR (75 MHz,  $DMSO-d_6$ )  $\delta$  176.4, 160.2, 131.9, 130.6, 129.4, 128.8, 126.3, 125.9, 123.8, 123.3, 123.2, 110.5, 81.0, 62.9, 59.5, 12.0. HRMS (ESI-TOF) Calcd. for  $C_{18}H_{14}^{79}BrN_2O_4S$   $[M+H]^+$ : 432.9858; found: 432.9852; For  $C_{18}H_{14}^{81}BrN_2O_4S$   $[M+H]^+$ : 434.9833; found: 434.9843.

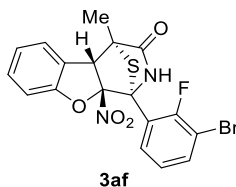

**(1R,4S,4aS,9aR)-1-(3-bromo-2-fluorophenyl)-4-methyl-9a-nitro-1,4,4a,9a-tetrahydro-1,4-epithiobenzofuro[2,3-c]pyridin-3(2H)-one (3af)**

White solid, 57% yield, 49.4 mg, >20:1 dr, 90% ee; m.p. 224.0-224.8 °C,  $[\alpha]_D^{25} = -112.3$  (c 0.5,  $CH_2Cl_2$ ). The ee was determined by HPLC (Chiralpak IC, EtOH/hexane = 20/80, flow rate 1.0 mL/min,  $\lambda = 220$  nm,  $t_{major} = 32.08$  min,  $t_{minor} = 17.18$  min);  $^1H$  NMR (300 MHz,  $DMSO-d_6$ )  $\delta$  10.08 (s, 1H), 7.99 – 7.82 (m, 1H), 7.62 – 7.54 (m, 1H), 7.47 (d,  $J = 7.1$  Hz, 1H), 7.42 – 7.35 (m, 1H), 7.34 – 7.26 (m, 1H), 7.19 – 7.10 (m, 2H), 4.82 (s, 1H), 1.60 (s, 3H).  $^{13}C$  NMR (101 MHz,



DMSO-*d*<sub>6</sub>)  $\delta$  176.1, 160.5, 156.7 (d,  $J$  = 253.5 Hz, 1C), 136.3, 130.9, 129.9, 126.6, 126.4 (d,  $J$  = 4.0 Hz, 1C), 125.7, 123.6 (d,  $J$  = 8.1 Hz, 1C), 118.5 (d,  $J$  = 13.1 Hz, 1C), 110.8, 110.3 (d,  $J$  = 22.2 Hz, 1C), 79.4, 79.4, 62.7, 59.9, 12.2. HRMS (ESI-TOF) Calcd. for C<sub>18</sub>H<sub>13</sub><sup>79</sup>BrFN<sub>2</sub>O<sub>4</sub>S [M+H]<sup>+</sup>: 450.9783; found: 450.9758; For C<sub>18</sub>H<sub>13</sub><sup>81</sup>BrFN<sub>2</sub>O<sub>4</sub>S [M+H]<sup>+</sup>: 452.9739; found: 452.9712.

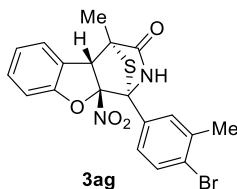

**(1R,4S,4aS,9aR)-1-(4-bromo-3-methylphenyl)-4-methyl-9a-nitro-1,4,4a,9a-tetrahydro-1,4-epithiobenzofuro[2,3-c]pyridin-3(2H)-one (3ag)**

Pale yellow solid, 42% yield, 37.6 mg, >20:1 dr, 97% ee. m.p. 202.4-203.3 °C,  $[\alpha]_{\text{D}}^{25}$  = -54.2 (c 0.5, CH<sub>2</sub>Cl<sub>2</sub>). The ee was determined by HPLC (Chiralpak IC, EtOH/hexane = 10/90, flow rate 1.0 mL/min,  $\lambda$  = 220 nm,  $t_{\text{major}}$  = 14.76 min,  $t_{\text{minor}}$  = 9.13 min); <sup>1</sup>H NMR (400 MHz, DMSO-*d*<sub>6</sub>)  $\delta$  10.17 (s, 1H), 7.70 (d,  $J$  = 8.4 Hz, 1H), 7.54 (d,  $J$  = 2.5 Hz, 1H), 7.46 (d,  $J$  = 7.5 Hz, 1H), 7.42 – 7.30 (m, 2H), 7.20 – 7.08 (m, 2H), 4.81 (s, 1H), 2.37 (s, 3H), 1.58 (s, 3H). <sup>13</sup>C NMR (151 MHz, DMSO-*d*<sub>6</sub>)  $\delta$  176.5, 160.4, 138.2, 132.9, 130.8, 130.0, 129.3, 126.9, 126.5, 126.4, 126.2, 123.6, 123.5, 110.8, 81.2, 63.1, 59.8, 23.1, 12.3. HRMS (ESI-TOF) Calcd. for C<sub>19</sub>H<sub>15</sub><sup>79</sup>BrN<sub>2</sub>NaO<sub>4</sub>S [M+Na]<sup>+</sup>: 468.9828; found: 468.9813; For C<sub>19</sub>H<sub>15</sub><sup>81</sup>BrN<sub>2</sub>NaO<sub>4</sub>S [M+Na]<sup>+</sup>: 470.9809; found: 470.9807.

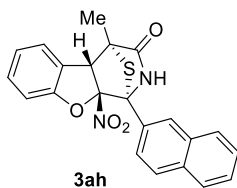

**(1R,4S,4aS,9aR)-4-methyl-1-(naphthalen-2-yl)-9a-nitro-1,4,4a,9a-tetrahydro-1,4-epithiobenzofuro[2,3-c]pyridin-3(2H)-one (3ah)**

White solid, 52% yield, 42.0 mg, >20:1 dr, 81% ee; m.p. 121.3-122.3 °C,  $[\alpha]_{\text{D}}^{25}$  = -71.2 (c 0.5, CH<sub>2</sub>Cl<sub>2</sub>); The ee was determined by HPLC (Chiralpak IC, EtOH/hexane = 10/90, flow rate 1.0 mL/min,  $\lambda$  = 220 nm,  $t_{\text{major}}$  = 36.56 min,  $t_{\text{minor}}$  = 20.45 min); <sup>1</sup>H NMR (300 MHz, DMSO-*d*<sub>6</sub>)  $\delta$  10.35 (s, 1H), 8.21 – 8.16 (m, 1H), 8.08 – 7.95 (m, 3H), 7.69 – 7.60 (m, 3H), 7.51 (d,  $J$  = 7.4 Hz, 1H), 7.46 – 7.36 (m, 1H), 7.28 – 7.12 (m, 2H), 4.88 (s, 1H), 1.63 (s, 3H). <sup>13</sup>C NMR (151 MHz, DMSO-*d*<sub>6</sub>)  $\delta$  176.6, 160.5, 133.6, 132.6, 130.8, 128.8, 128.7, 128.1, 128.0, 127.5, 127.3, 127.1, 126.6, 126.5, 124.7, 123.7, 123.5, 110.8, 82.1, 63.1, 60.0, 12.3. HRMS (ESI-TOF) Calcd. for C<sub>22</sub>H<sub>17</sub>N<sub>2</sub>O<sub>4</sub>S [M+H]<sup>+</sup>: 405.0904; found: 405.0906.

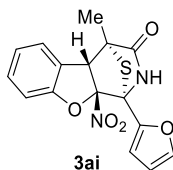

**(1R,4S,4aS,9aR)-1-(furan-2-yl)-4-methyl-9a-nitro-1,4,4a,9a-tetrahydro-1,4-epithiobenzofuro[2,3-c]pyridin-3(2H)-one (3ai)**

Yellow solid, 83% yield, 57.2 mg, >20:1 dr, 81% ee; m.p. 134.3-135.1 °C,  $[\alpha]_{\text{D}}^{25} = -86.6$  (c 0.5, CH<sub>2</sub>Cl<sub>2</sub>). The ee was determined by HPLC (Chiralpak IC, EtOH/hexane = 10/90, flow rate 1.0 mL/min,  $\lambda = 220$  nm,  $t_{\text{major}} = 24.80$  min,  $t_{\text{minor}} = 14.80$  min); <sup>1</sup>H NMR (300 MHz, DMSO-*d*<sub>6</sub>)  $\delta$  10.23 (s, 1H), 7.94 – 7.80 (m, 1H), 7.47 (d,  $J = 7.5$  Hz, 1H), 7.43 – 7.35 (m, 1H), 7.24 – 7.09 (m, 2H), 6.85 (d,  $J = 3.5$  Hz, 1H), 6.60 (dd,  $J = 3.5, 1.8$  Hz, 1H), 4.81 (s, 1H), 1.57 (s, 3H). <sup>13</sup>C NMR (75 MHz, DMSO-*d*<sub>6</sub>)  $\delta$  175.3, 160.2, 145.2, 142.3, 130.4, 126.1, 125.1, 123.1, 123.0, 111.4, 111.2, 110.4, 75.9, 63.1, 58.9, 11.9. HRMS (ESI-TOF) Calcd. for C<sub>16</sub>H<sub>12</sub>N<sub>2</sub>O<sub>5</sub>S [M+Na]<sup>+</sup>: 367.0359; found: 367.0360.

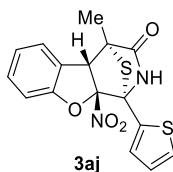

**(1S,4S,4aS,9aR)-4-methyl-9a-nitro-1-(thiophen-2-yl)-1,4,4a,9a-tetrahydro-1,4-epithiobenzofuro[2,3-c]pyridin-3(2H)-one (3aj)**

Yellow solid, 60% yield, 43.3 mg, >20:1 dr, 75% ee; m.p. 155.2-156.0 °C,  $[\alpha]_{\text{D}}^{25} = -1.6$  (c 0.5, CH<sub>2</sub>Cl<sub>2</sub>). The ee was determined by HPLC (Chiralpak IC, EtOH/hexane = 10/90, flow rate 1.0 mL/min,  $\lambda = 220$  nm,  $t_{\text{major}} = 22.54$  min,  $t_{\text{minor}} = 10.56$  min); <sup>1</sup>H NMR (300 MHz, DMSO-*d*<sub>6</sub>)  $\delta$  10.32 (s, 1H), 7.75 (dd,  $J = 5.1, 1.3$  Hz, 1H), 7.53 – 7.44 (m, 2H), 7.44 – 7.37 (m, 1H), 7.21 (d,  $J = 8.1$  Hz, 1H), 7.18 – 7.09 (m, 2H), 4.85 (s, 1H), 1.57 (s, 3H). <sup>13</sup>C NMR (75 MHz, DMSO-*d*<sub>6</sub>)  $\delta$  175.6, 160.0, 130.9, 130.4, 129.2, 128.1, 127.1, 126.1, 124.9, 123.3, 123.1, 110.3, 78.6, 63.7, 59.3, 11.8. HRMS (ESI-TOF) Calcd. for C<sub>16</sub>H<sub>13</sub>N<sub>2</sub>O<sub>4</sub>S<sub>2</sub> [M+H]<sup>+</sup>: 361.0311; found: 361.0314.

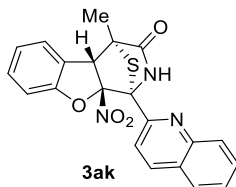

**(1R,4S,4aS,9aR)-4-methyl-9a-nitro-1-(quinolin-2-yl)-1,4,4a,9a-tetrahydro-1,4-epithiobenzofuro[2,3-c]pyridin-3(2H)-one (3ak)**

Pale yellow solid, 64% yield, 51.8 mg, >20:1 dr, 80% ee; m.p. 221.9-222.7 °C,  $[\alpha]_{\text{D}}^{25} = -60.3$  (c 0.5, CH<sub>2</sub>Cl<sub>2</sub>). The ee was determined by HPLC (Chiralpak IC, EtOH/hexane = 10/90, flow rate 1.0 mL/min,  $\lambda = 220$  nm,  $t_{\text{major}} = 19.62$  min,  $t_{\text{minor}} = 16.90$  min); <sup>1</sup>H NMR (400 MHz, DMSO-*d*<sub>6</sub>)  $\delta$  10.19 (s, 1H), 8.62 – 8.55 (m, 1H), 8.13 – 8.02 (m, 2H), 7.92 – 7.83 (m, 1H), 7.78 – 7.66 (m, 2H), 7.55-7.48 (m, 1H), 7.44 – 7.35 (m, 1H), 7.20 – 7.12 (m, 2H), 4.86 (s, 1H), 1.64 (s, 3H). <sup>13</sup>C NMR (101 MHz, DMSO-*d*<sub>6</sub>)  $\delta$  176.0, 160.6, 149.0, 146.8, 138.3, 131.2, 130.8, 129.5, 128.5, 128.4, 128.3, 126.6, 125.8, 123.7, 123.4, 119.9, 110.9, 83.4, 63.5, 60.0, 12.5. HRMS (ESI-TOF) Calcd. for C<sub>21</sub>H<sub>16</sub>N<sub>2</sub>O<sub>4</sub>S<sub>2</sub> [M+H]<sup>+</sup>: 406.0856; found: 406.0864.

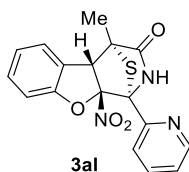

**(1R,4S,4aS,9aR)-4-methyl-9a-nitro-1-(pyridin-2-yl)-1,4,4a,9a-tetrahydro-1,4-epithiobenzofuro[2,3-c]pyridin-3(2H)-one (3al)**

White solid, 70% yield, 49.8 mg, >20:1 dr, 82% ee; m.p. 182.6-183.5 °C,  $[\alpha]_D^{25} = -113.2$  (c 0.5, CH<sub>2</sub>Cl<sub>2</sub>); The ee was determined by HPLC (Chiralpak IC, EtOH/hexane = 10/90, flow rate 1.0 mL/min,  $\lambda = 220$  nm,  $t_{\text{major}} = 35.00$  min,  $t_{\text{minor}} = 28.40$  min); <sup>1</sup>H NMR (300 MHz, DMSO-*d*<sub>6</sub>)  $\delta$  10.14 (s, 1H), 8.69 – 8.61 (m, 1H), 8.05 – 7.93 (m, 1H), 7.56 (dd, *J* = 8.2, 4.2 Hz, 2H), 7.47 (d, *J* = 7.5 Hz, 1H), 7.42 – 7.31 (m, 1H), 7.13 (dd, *J* = 8.0, 5.7 Hz, 2H), 4.77 (s, 1H), 1.59 (s, 3H). <sup>13</sup>C NMR (101 MHz, DMSO-*d*<sub>6</sub>)  $\delta$  176.2, 160.6, 149.6, 148.5, 137.9, 130.7, 126.5, 125.7, 125.6, 123.8, 123.3, 123.0, 110.8, 83.5, 62.9, 60.1, 12.4. HRMS (ESI-TOF) Calcd. for C<sub>17</sub>H<sub>14</sub>N<sub>3</sub>O<sub>4</sub>S [M+H]<sup>+</sup>: 356.0700; found: 356.0694.

### 3. Scale-up experiment

To a flame dried reaction tube were added 2-nitrobenzofurans **1a** (1.0 mmol), 5*H*-thiazol-4-ones **2a** (1.3 mmol, 1.3 equiv), **Cat. D** (20 mol%), and activated 5 Å molecular sieve (500 g), followed by addition CH<sub>2</sub>Cl<sub>2</sub> (10.0 mL). The reaction solution was stirred at room temperature for 48 h under a nitrogen atmosphere. After completion, the reaction mixture was directly purified by flash chromatography on silica gel (petroleum ether/ethyl acetate = 10:1) to give the corresponding products **3a** (0.317 g, 89% yield, >20:1 dr, and >96% ee).

To a flame dried reaction tube were added 2-nitrobenzofurans **1f** (3.0 mmol), 5*H*-thiazol-4-ones **2a** (3.9 mmol, 1.3 equiv), **Cat. D** (20 mol%), and activated 5 Å molecular sieve (1.5 g), followed by addition CH<sub>2</sub>Cl<sub>2</sub> (30.0 mL). The reaction solution was stirred at room temperature for 48 h under a nitrogen atmosphere. After completion, the reaction mixture was directly purified by flash chromatography on silica gel (petroleum ether/ethyl acetate = 10:1) to give the corresponding products **3a** (1.01 g, 78% yield, >20:1 dr, and 93% ee).

### 4. X-Ray crystal data for compounds **3a**

Single crystals of compound **3a** was prepared from the mixture solvent of EtOH and CH<sub>2</sub>Cl<sub>2</sub>. A suitable crystal was selected for structure determination on a Xcalibur, Eos, Gemini diffractometer. The crystal was kept at 293(2) K during data collection. Using Olex2, the structure was solved with the ShelXS structure solution program using Direct Methods and refined with the ShelXLrefinement package using Least Squares minimisation.

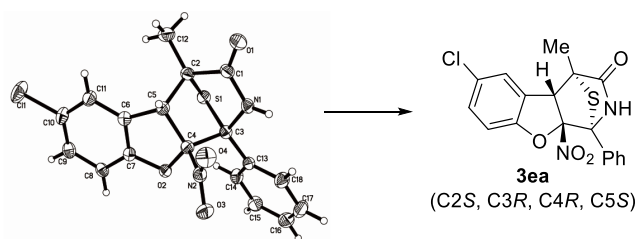

ORTEP of **3a** (at 50% level)

Crystal data and structure refinement for **3a** (CCDC-2095172)

|                     |                                                                                |
|---------------------|--------------------------------------------------------------------------------|
| Identification code | <b>3a</b>                                                                      |
| Empirical formula   | C <sub>20</sub> H <sub>19</sub> ClN <sub>2</sub> O <sub>5</sub> S <sub>2</sub> |
| Formula weight      | 466.94                                                                         |
| Temperature/K       | 293(2)                                                                         |
| Crystal system      | monoclinic                                                                     |
| Space group         | C2                                                                             |
| <i>a</i> /Å         | 26.7417(6)                                                                     |

|                                                |                                                               |
|------------------------------------------------|---------------------------------------------------------------|
| b/Å                                            | 6.38250(16)                                                   |
| c/Å                                            | 12.8324(3)                                                    |
| $\alpha/^\circ$                                | 90                                                            |
| $\beta/^\circ$                                 | 103.440(2)                                                    |
| $\gamma/^\circ$                                | 90                                                            |
| Volume/Å <sup>3</sup>                          | 2130.24(9)                                                    |
| Z                                              | 4                                                             |
| $\rho_{\text{calc}}/\text{cm}^3$               | 1.456                                                         |
| $\mu/\text{mm}^{-1}$                           | 3.728                                                         |
| F(000)                                         | 968.0                                                         |
| Crystal size/mm <sup>3</sup>                   | 0.17 × 0.12 × 0.09                                            |
| Radiation                                      | CuK $\alpha$ ( $\lambda = 1.54184$ )                          |
| 2 $\theta$ range for data collection/ $^\circ$ | 6.796 to 134.108                                              |
| Index ranges                                   | -28 ≤ h ≤ 31, -7 ≤ k ≤ 7, -15 ≤ l ≤ 15                        |
| Reflections collected                          | 7977                                                          |
| Independent reflections                        | 3813 [R <sub>int</sub> = 0.0320, R <sub>sigma</sub> = 0.0422] |
| Data/restraints/parameters                     | 3813/1/278                                                    |
| Goodness-of-fit on F <sup>2</sup>              | 1.027                                                         |
| Final R indexes [ $I \geq 2\sigma(I)$ ]        | R <sub>1</sub> = 0.0425, wR <sub>2</sub> = 0.1083             |
| Final R indexes [all data]                     | R <sub>1</sub> = 0.0462, wR <sub>2</sub> = 0.1133             |
| Largest diff. peak/hole / e Å <sup>-3</sup>    | 0.23/-0.46                                                    |
| Flack parameter                                | 0.001(14)                                                     |

## 5. General experimental procedures for in vitro cytotoxicity assay

Two human cancer cell lines, human leukemia cells K562 and human lung cancer cells A549 were purchased from Chinese Academy of Sciences, Kunming Cell Bank and Chinese Academy of Sciences, Shanghai Cell Bank respectively. All the cells were cultured in RPMI-1640 medium (GIBICO, USA), supplemented with 10% fetal bovine serum (Hyclone, USA) and Penicillin-Streptomycin (respectively 100 U/mL) in 5% CO<sub>2</sub> at 37 °C. The cytotoxicity assay was performed according to the MTT (3-(4,5-dimethylthiazol-2-yl)-2,5-diphenyl tetrazolium bromide) method in 96-well microplates. Briefly, 5000 cells were seeded into each well of 96-well cell culture plates and allowed to grow for 24 h before the drug is added. Unless K562 tumor cell line was exposed to compounds at the concentrations of 1, 2, 4, 8 and 20  $\mu\text{mol}\cdot\text{L}^{-1}$ , each A549 tumor cell line was exposed to the test compounds at the concentrations of 5, 10, 20, 40 and 80  $\mu\text{mol}\cdot\text{L}^{-1}$  in triplicates for 48 h, comparable to cisplatin (Aladdin, China). Then the MTT reagent was added to reaction with the cancer cells for 4 hours. At least, measure the OD value at 490 wavelengths. The average 50% inhibitory concentration (IC<sub>50</sub>) of all the compounds is calculated by IBM SPSS Statistics (version 19). Each concentration was analyzed in triplicate at least, and the whole experiment was repeated three times.

**Table 1. Cell Inhibitory Assay of target products in K562 and A549.**

| compound | IC <sub>50</sub> ( $\mu\text{M}$ ) <sup>a</sup> | compound | IC <sub>50</sub> ( $\mu\text{M}$ ) <sup>a</sup> |
|----------|-------------------------------------------------|----------|-------------------------------------------------|
|----------|-------------------------------------------------|----------|-------------------------------------------------|

|                              | <b>A549</b> | <b>K562</b> |            | <b>A549</b> | <b>K562</b> |
|------------------------------|-------------|-------------|------------|-------------|-------------|
| <b>3aa</b>                   | 28.15       | 12.4        | <b>3ba</b> | 32.58       | 13.02       |
| <b>3ca</b>                   | 57.72       | 18.97       | <b>3da</b> | 34.29       | 10.27       |
| <b>3ea</b>                   | 45.33       | 21.42       | <b>3fa</b> | 67.59       | 30.87       |
| <b>3ga</b>                   | 30.84       | 7.09        | <b>3ha</b> | 67.32       | 22.27       |
| <b>3ja</b>                   | 33.26       | 14.54       | <b>3ka</b> | 4.83        | 2.60        |
| <b>3la</b>                   | 31.84       | 20.33       | <b>3ma</b> | 33.00       | 29.62       |
| <b>3oa</b>                   | 15.61       | 3.10        | <b>3ab</b> | 57.00       | 52.19       |
| <b>3ac</b>                   | 58.23       | 74.61       | <b>3ad</b> | 39.95       | 50.23       |
| <b>3ae</b>                   | 45.51       | 54.74       | <b>3af</b> | 39.50       | 46.39       |
| <b>3ai</b>                   | 44.60       | 30.21       | <b>3aj</b> | 61.08       | 45.05       |
| <b>3ak</b>                   | 20.46       | 59.39       | <b>3al</b> | 23.88       | 32.32       |
| <b>cisplatin<sup>b</sup></b> | 23.96       | 20.33       |            |             |             |

<sup>a</sup>IC<sub>50</sub> is the concentration of a compound that affords a 50% reduction in cell growth (after 48 h of incubation), expressed as the mean of triplicate experiments. <sup>b</sup>Commercially available broad-spectrum anticancer drug cisplatin as a positive control.

## 6. $^1\text{H}$ , $^{13}\text{C}$ NMR, and HPLC spectra for compounds 3

### $^1\text{H}$ , $^{13}\text{C}$ NMR of compound 3aa

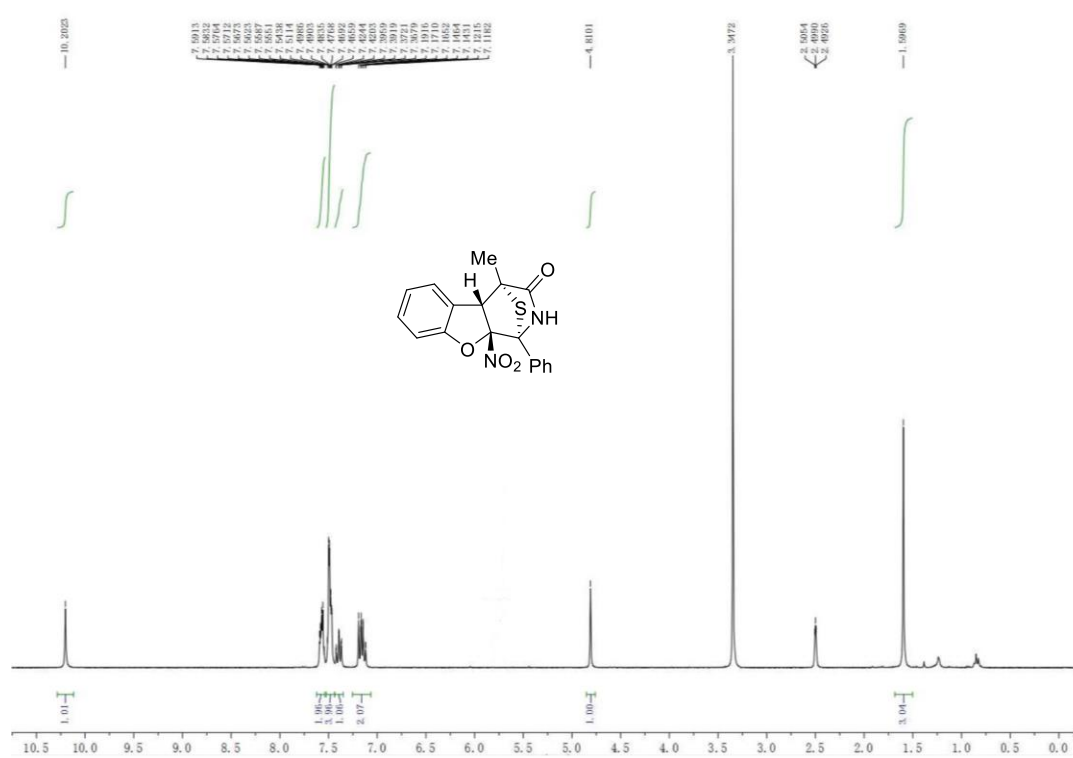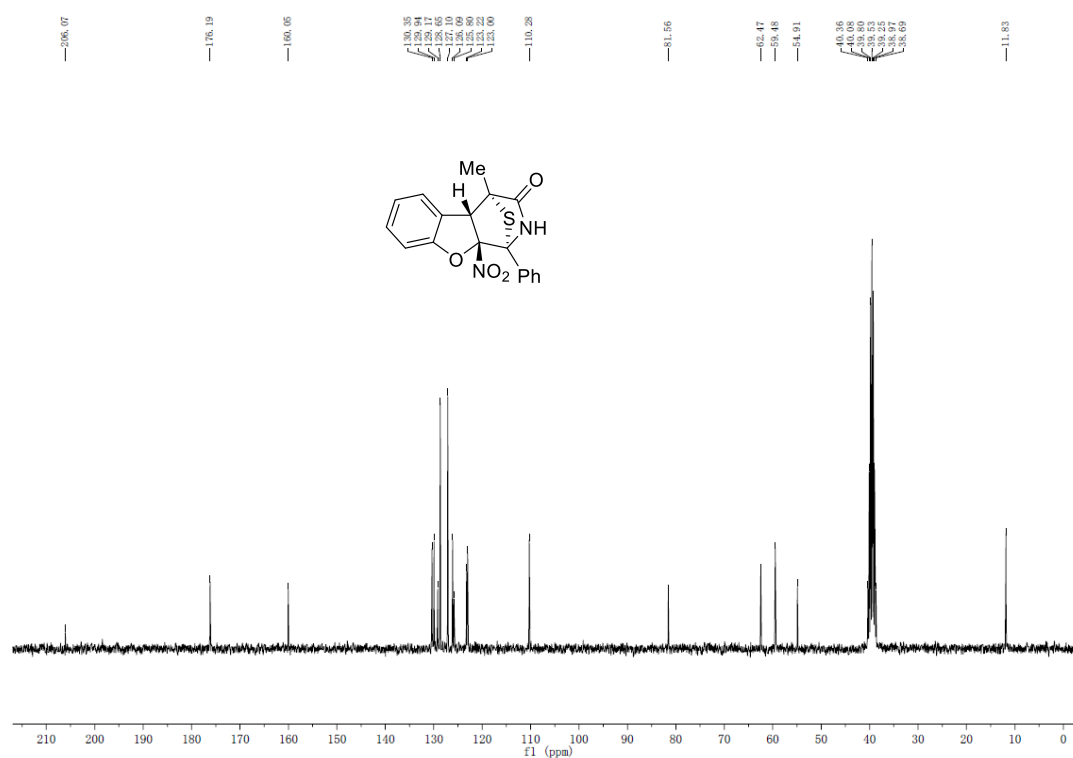

### HPLC of compound 3aa

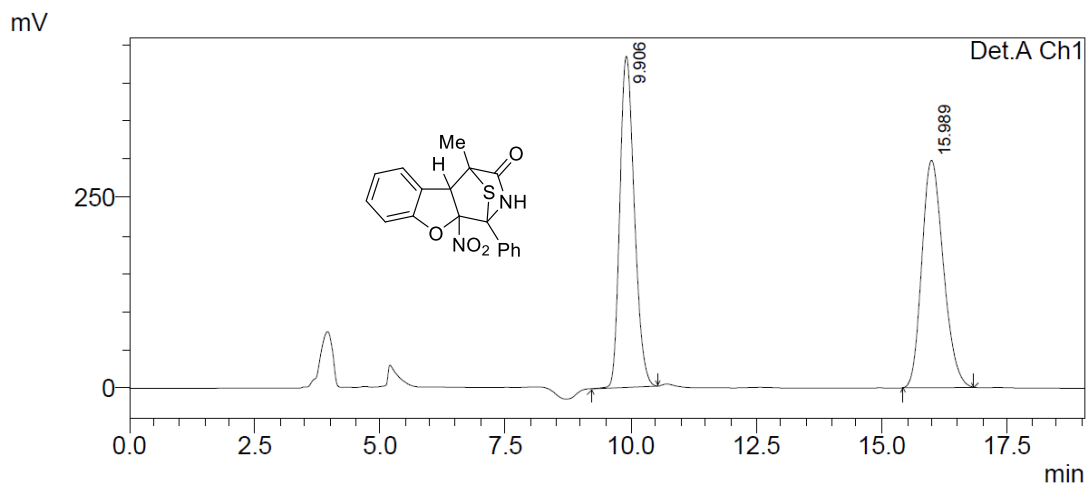

PeakTable

Detector A Ch1 220nm

| Peak# | Ret. Time | Area     | Height | Area %  |
|-------|-----------|----------|--------|---------|
| 1     | 9.906     | 8746512  | 433106 | 49.640  |
| 2     | 15.989    | 8873271  | 297338 | 50.360  |
| Total |           | 17619783 |        | 100.000 |

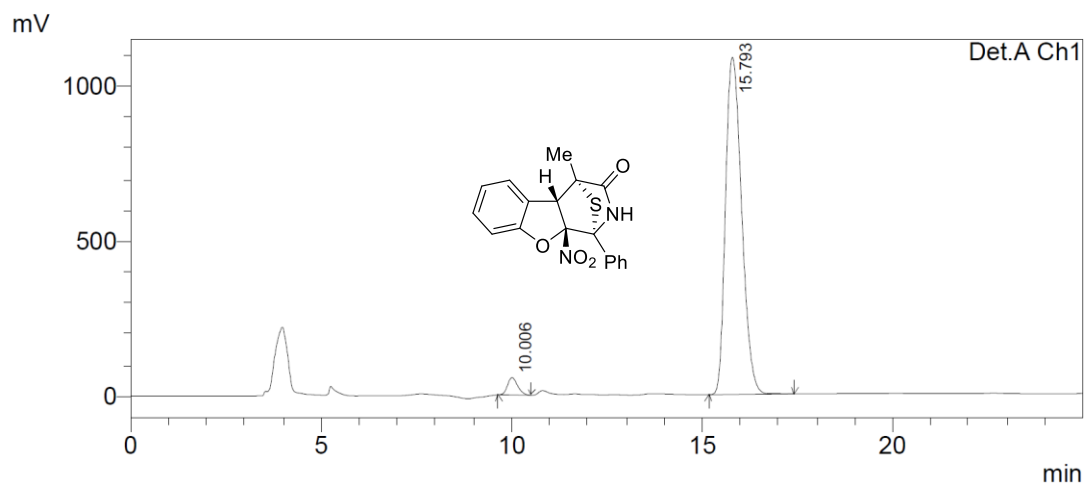

PeakTable

Detector A Ch1 220nm

| Peak# | Ret. Time | Area     | Height  | Area %  |
|-------|-----------|----------|---------|---------|
| 1     | 10.006    | 1025293  | 55973   | 3.098   |
| 2     | 15.793    | 32068345 | 1088783 | 96.902  |
| Total |           | 33093639 |         | 100.000 |

$^1\text{H}$ ,  $^{13}\text{C}$  NMR of compound **3ba**

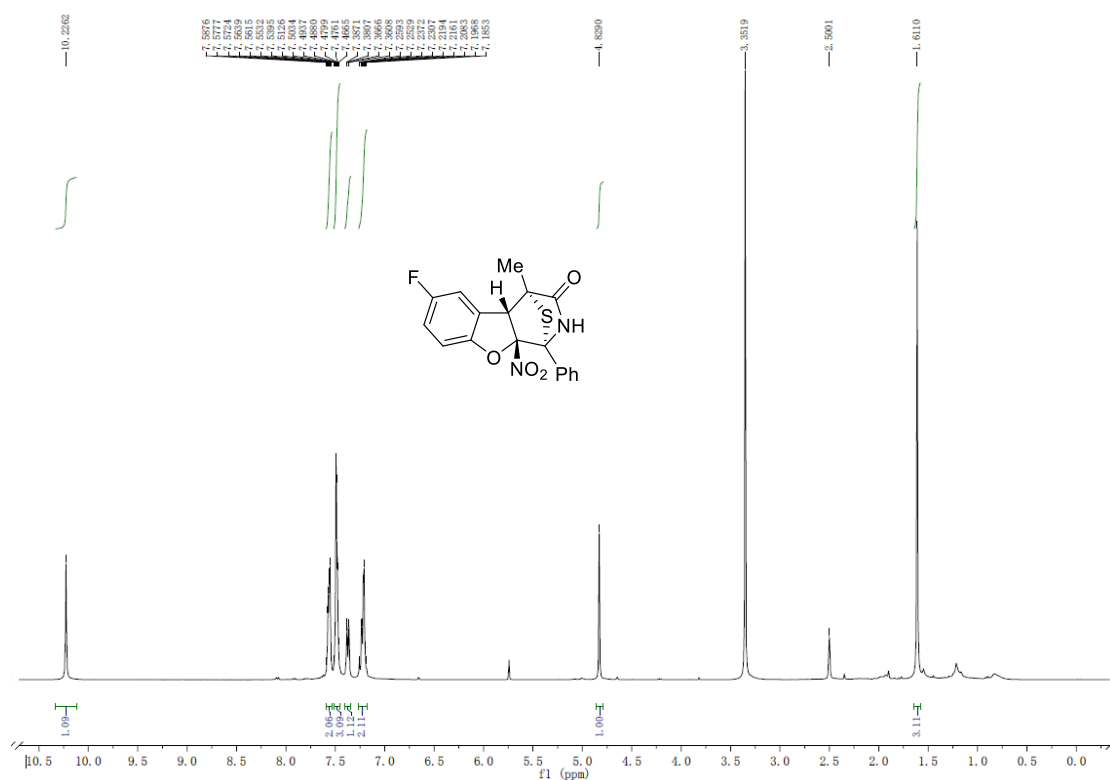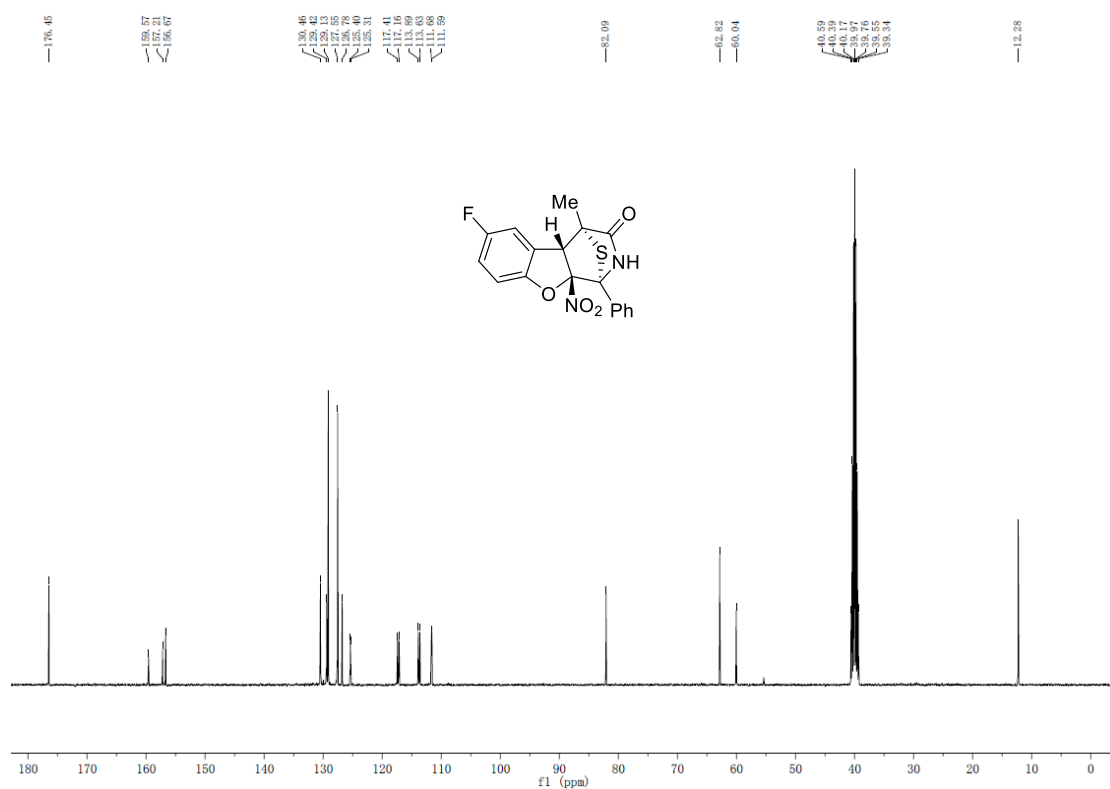



### HPLC of compound **3ba**

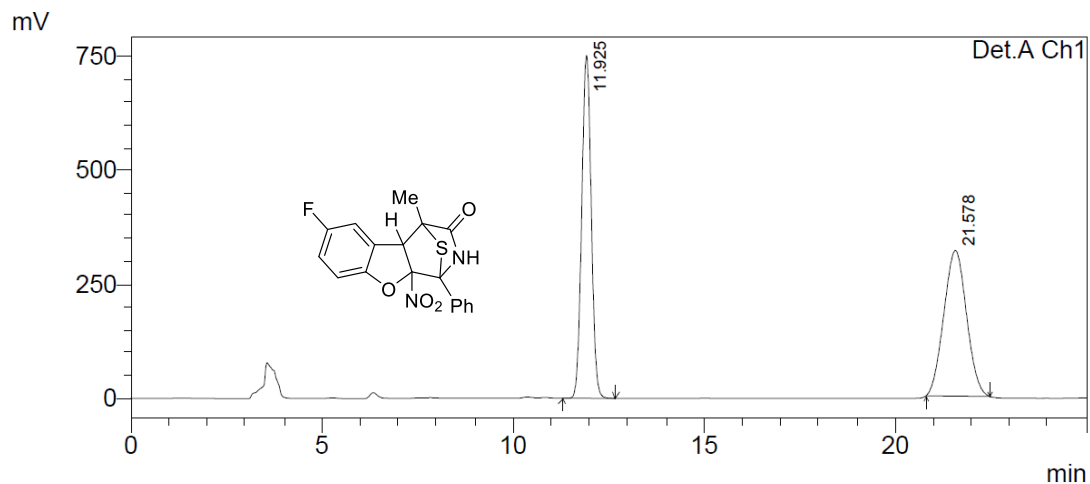

PeakTable

Detector A Ch1 220nm

| Peak# | Ret. Time | Area     | Height | Area %  |
|-------|-----------|----------|--------|---------|
| 1     | 11.925    | 13010510 | 750662 | 49.631  |
| 2     | 21.578    | 13203885 | 319046 | 50.369  |
| Total |           | 26214395 |        | 100.000 |

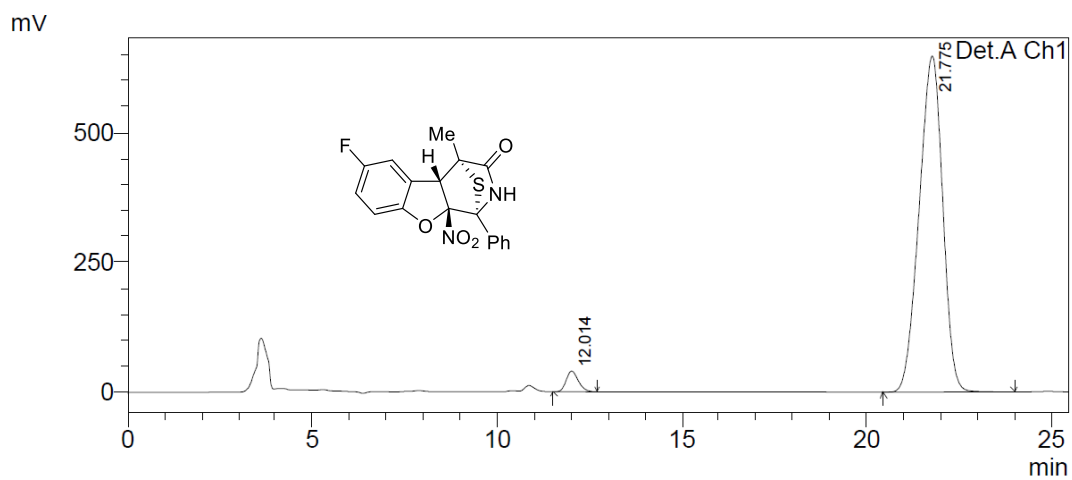

PeakTable

Detector A Ch1 220nm

| Peak# | Ret. Time | Area     | Height | Area %  |
|-------|-----------|----------|--------|---------|
| 1     | 12.014    | 904259   | 39667  | 3.063   |
| 2     | 21.775    | 28621222 | 646290 | 96.937  |
| Total |           | 29525481 |        | 100.000 |

$^1\text{H}$ ,  $^{13}\text{C}$  NMR of compound **3ca**

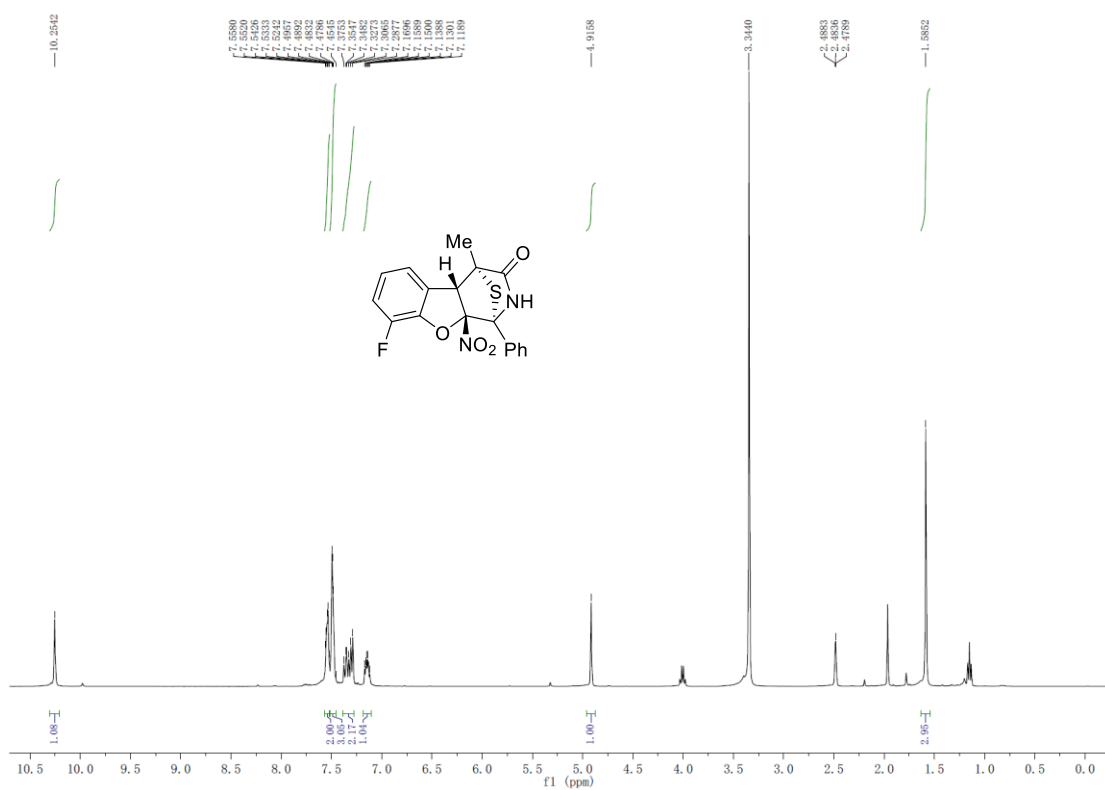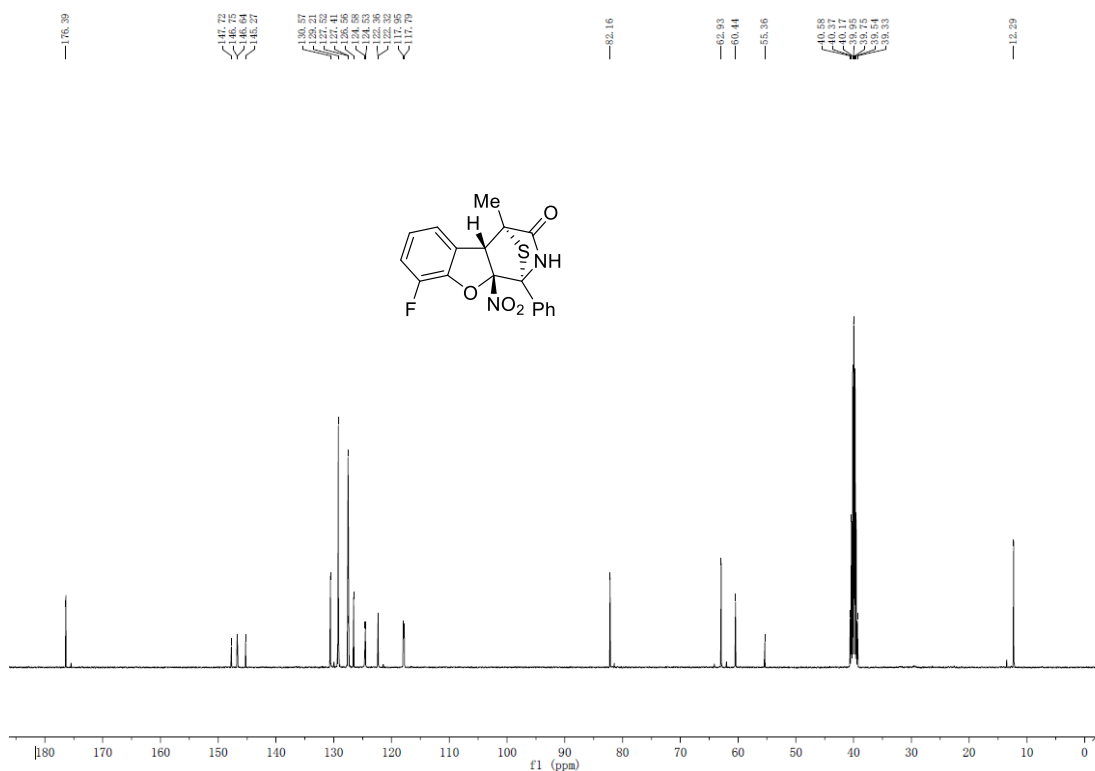

### HPLC of compound 3ca

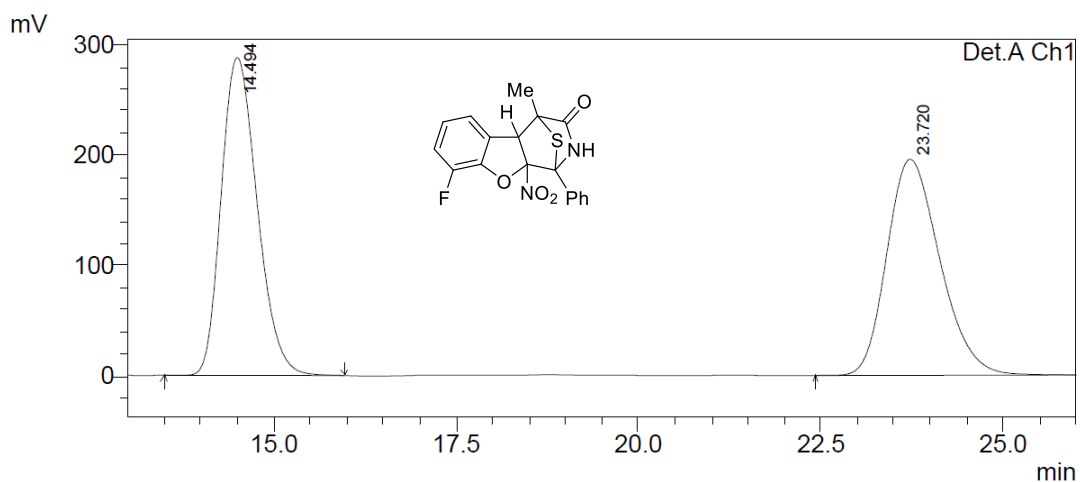

PeakTable

Detector A Ch1 220nm

| Peak# | Ret. Time | Area     | Height | Area %  |
|-------|-----------|----------|--------|---------|
| 1     | 14.494    | 9902093  | 288120 | 50.012  |
| 2     | 23.720    | 9897222  | 195793 | 49.988  |
| Total |           | 19799315 |        | 100.000 |

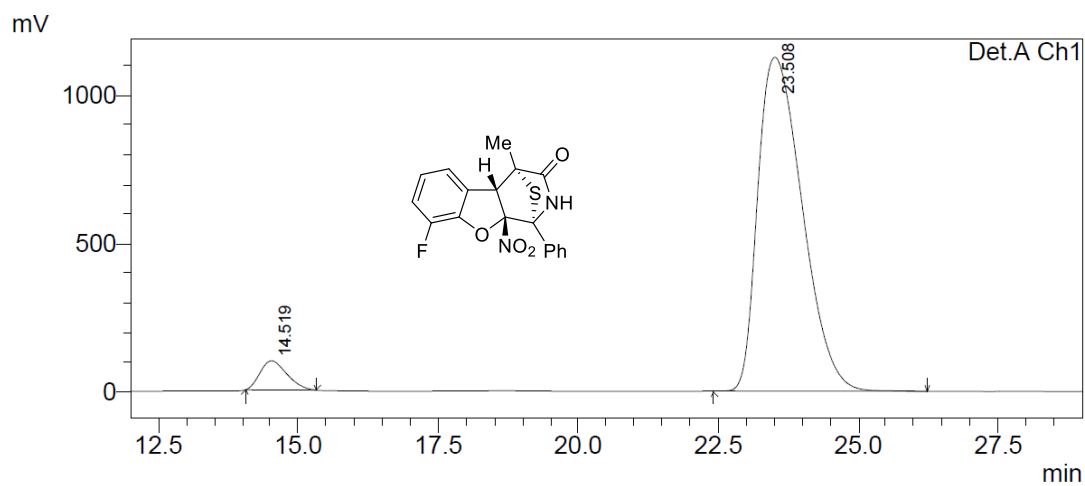

PeakTable

Detector A Ch1 220nm

| Peak# | Ret. Time | Area     | Height  | Area %  |
|-------|-----------|----------|---------|---------|
| 1     | 14.519    | 3298316  | 98486   | 5.032   |
| 2     | 23.508    | 62253856 | 1126090 | 94.968  |
| Total |           | 65552173 |         | 100.000 |

$^1\text{H}$ ,  $^{13}\text{C}$  NMR of compound **3da**

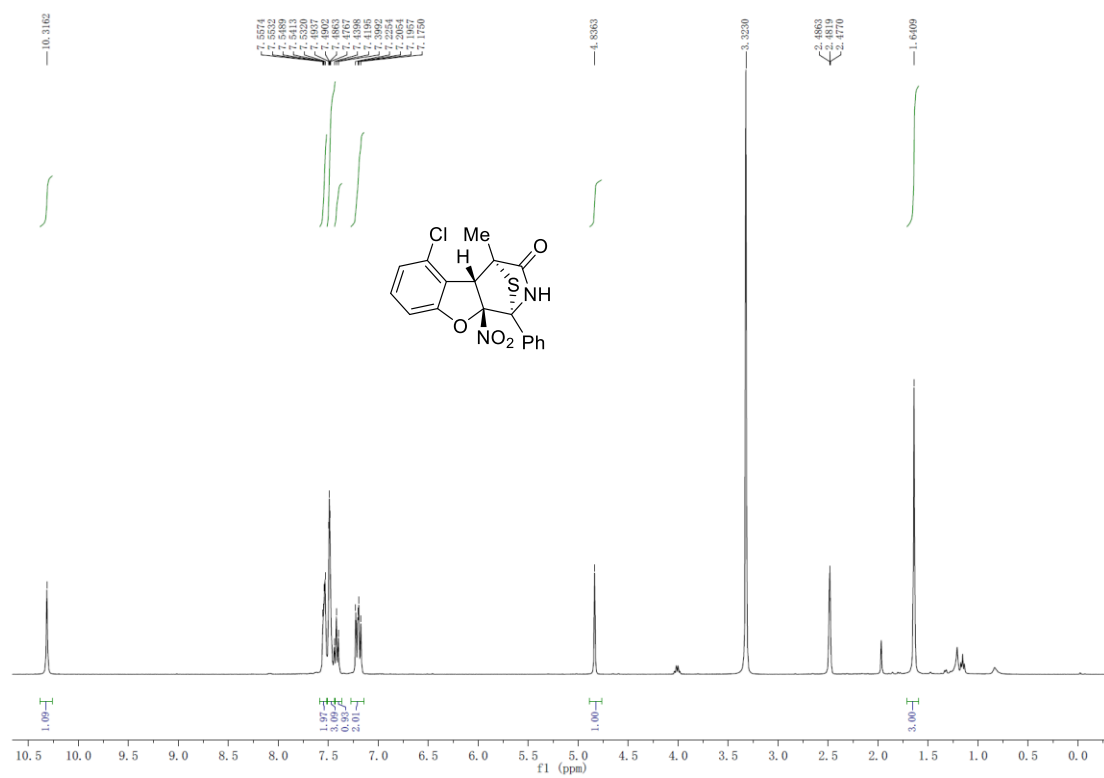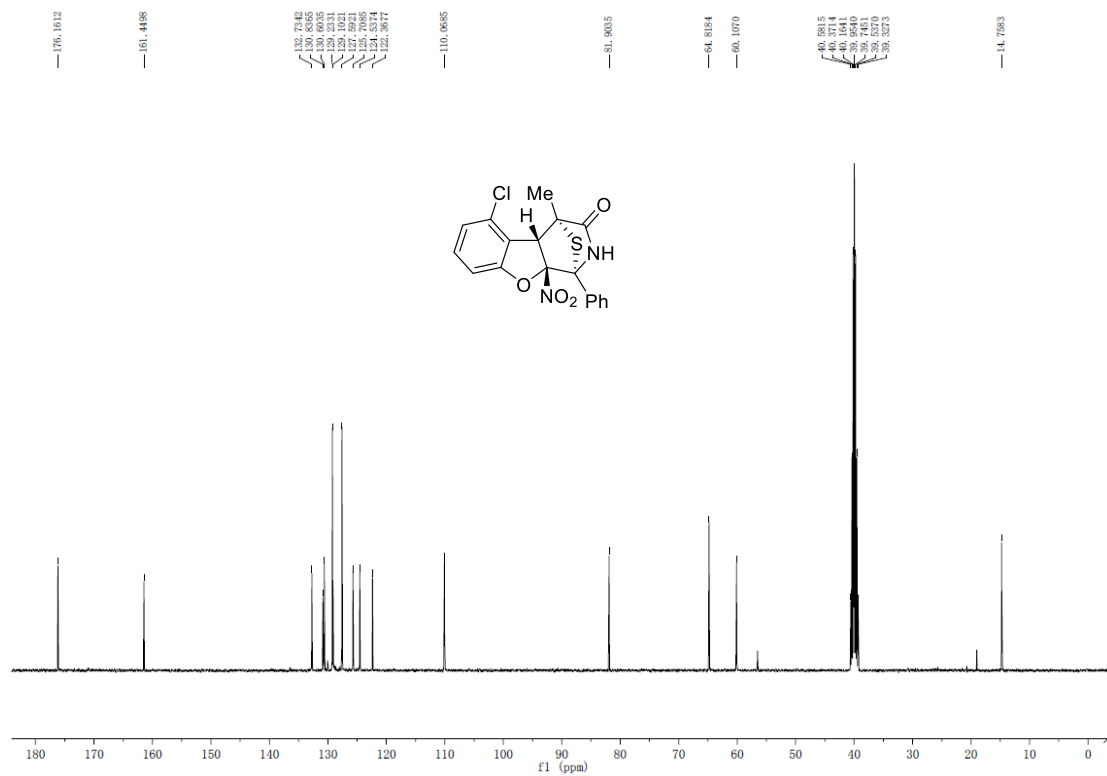

### HPLC of compound **3da**

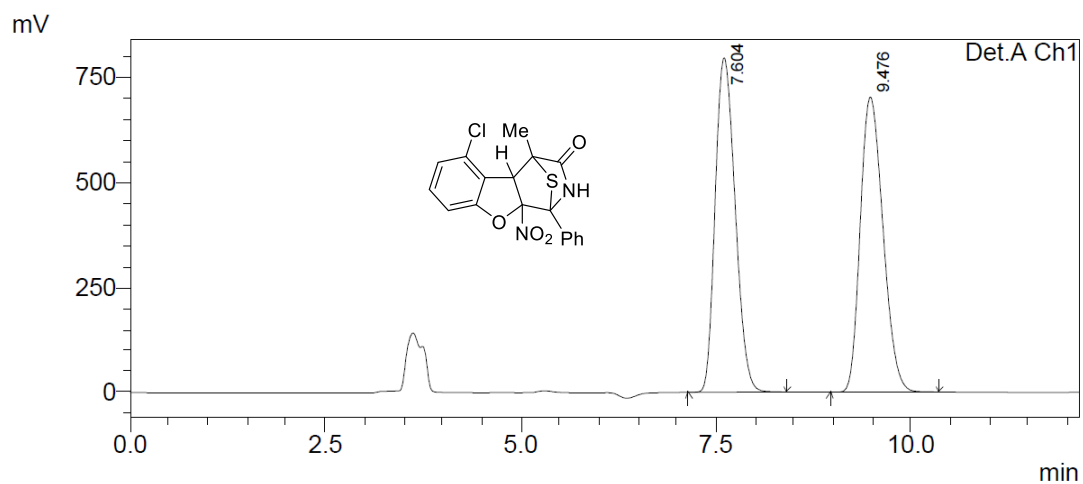

1 Det.A Ch1/220nm

PeakTable

Detector A Ch1 220nm

| Peak# | Ret. Time | Area     | Height | Area %  |
|-------|-----------|----------|--------|---------|
| 1     | 7.604     | 14141982 | 794418 | 49.914  |
| 2     | 9.476     | 14190453 | 700566 | 50.086  |
| Total |           | 28332435 |        | 100.000 |

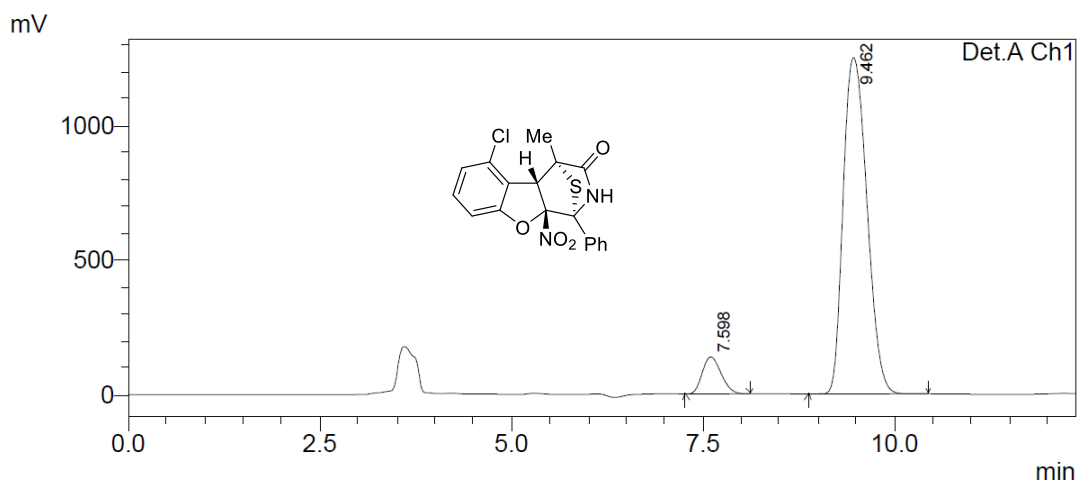

1 Det.A Ch1/220nm

PeakTable

Detector A Ch1 220nm

| Peak# | Ret. Time | Area     | Height  | Area %  |
|-------|-----------|----------|---------|---------|
| 1     | 7.598     | 2354077  | 137726  | 8.031   |
| 2     | 9.462     | 26957742 | 1250875 | 91.969  |
| Total |           | 29311819 |         | 100.000 |



### HPLC of compound 3ea

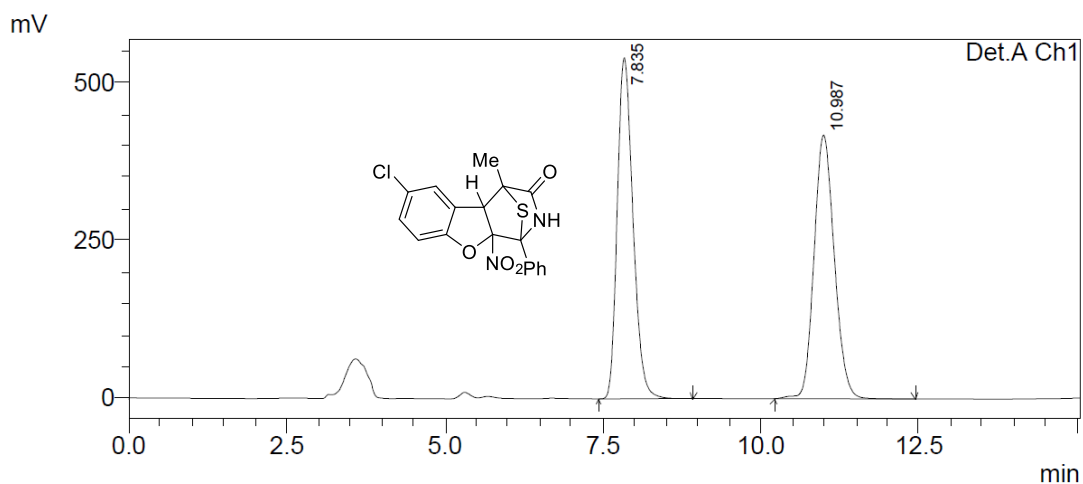

PeakTable

Detector A Ch1 220nm

| Peak# | Ret. Time | Area     | Height | Area %  |
|-------|-----------|----------|--------|---------|
| 1     | 7.835     | 9343910  | 541010 | 50.026  |
| 2     | 10.987    | 9334129  | 418361 | 49.974  |
| Total |           | 18678039 |        | 100.000 |

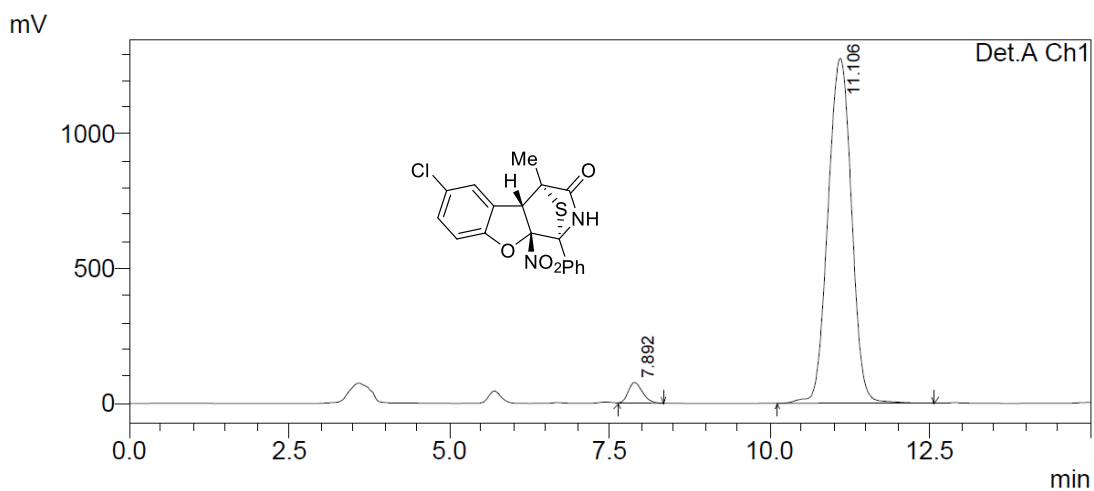

PeakTable

Detector A Ch1 220nm

| Peak# | Ret. Time | Area     | Height  | Area %  |
|-------|-----------|----------|---------|---------|
| 1     | 7.892     | 1160770  | 76013   | 3.413   |
| 2     | 11.106    | 32847844 | 1280990 | 96.587  |
| Total |           | 34008614 |         | 100.000 |

$^1\text{H}$ ,  $^{13}\text{C}$  NMR of compound **3fa**

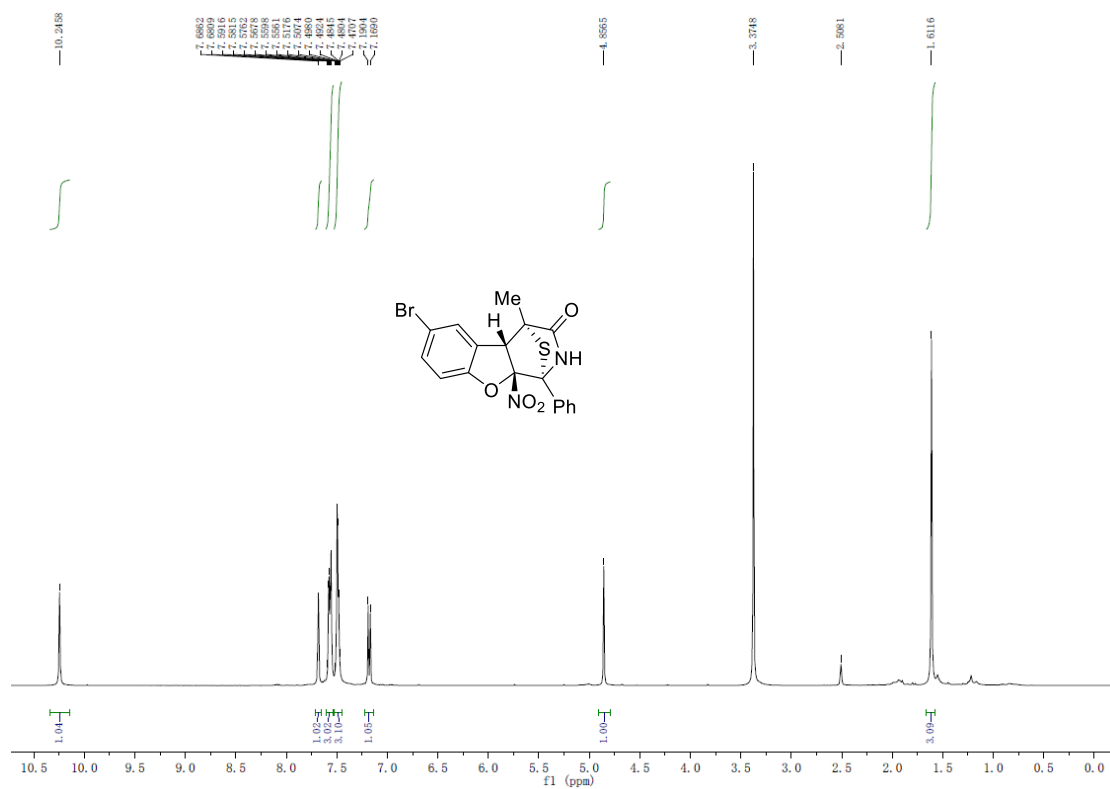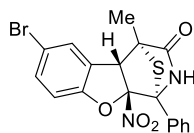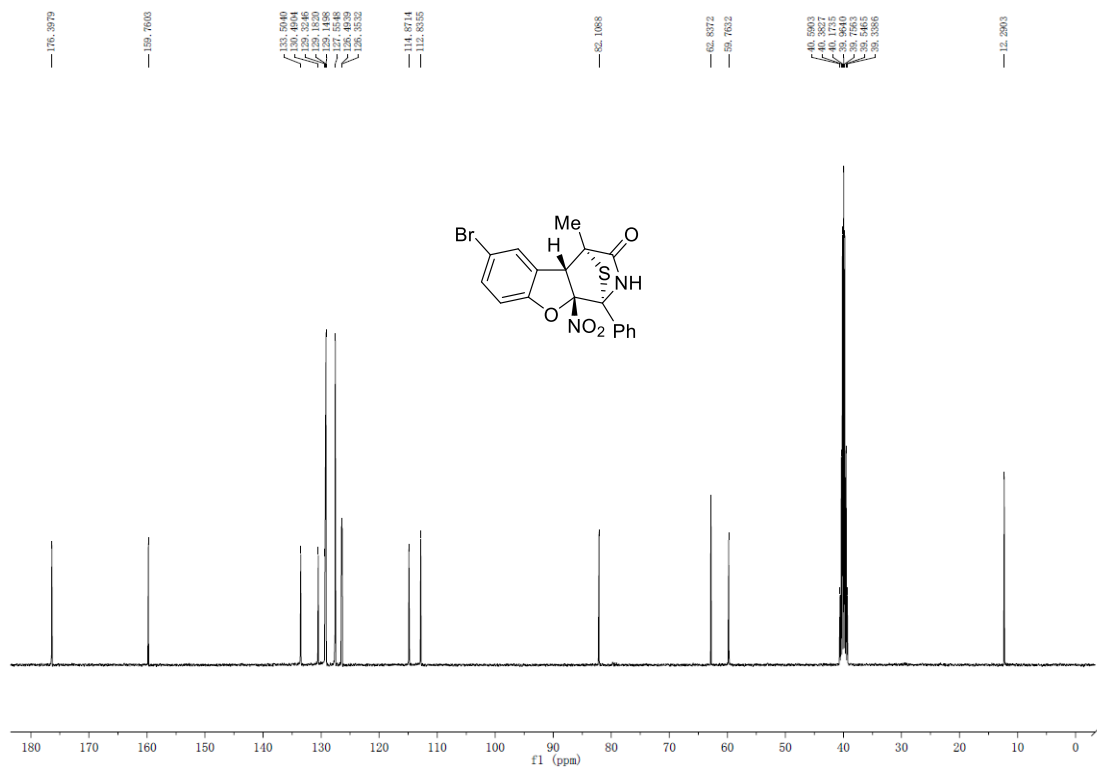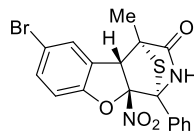



### HPLC of compound **3fa**

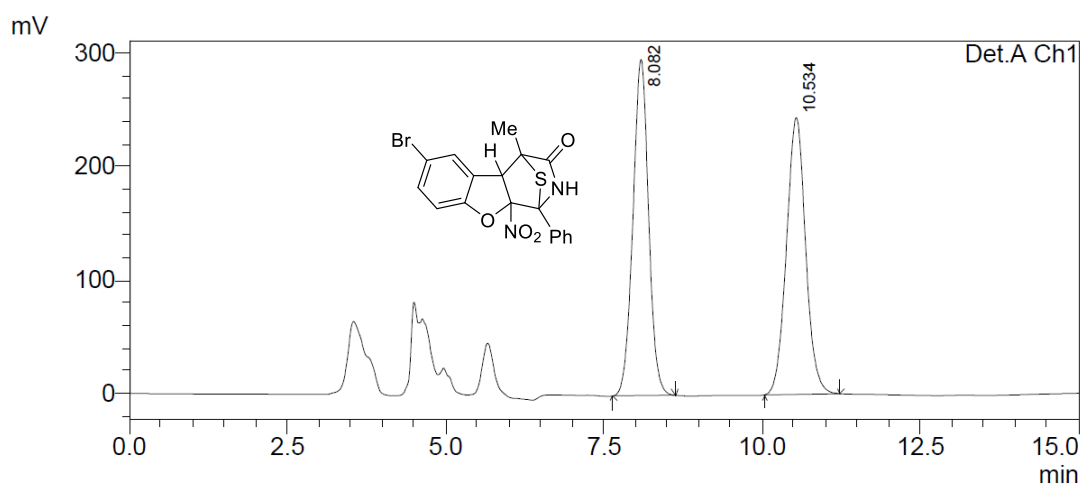

PeakTable

Detector A Ch1 220nm

| Peak# | Ret. Time | Area     | Height | Area %  |
|-------|-----------|----------|--------|---------|
| 1     | 8.082     | 5095754  | 295938 | 49.774  |
| 2     | 10.534    | 5141990  | 243511 | 50.226  |
| Total |           | 10237744 |        | 100.000 |

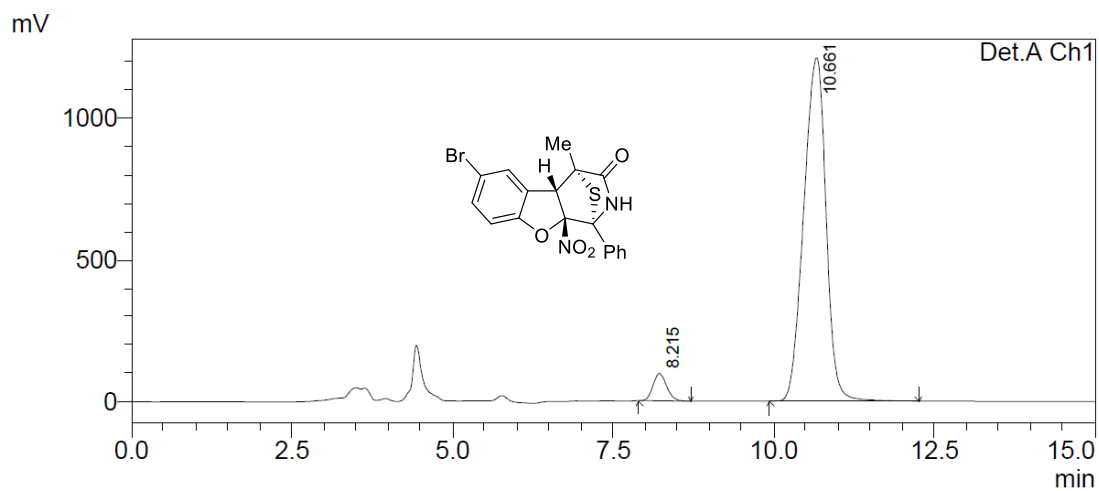

PeakTable

Detector A Ch1 220nm

| Peak# | Ret. Time | Area     | Height  | Area %  |
|-------|-----------|----------|---------|---------|
| 1     | 8.215     | 1423202  | 96310   | 4.649   |
| 2     | 10.661    | 29191194 | 1211374 | 95.351  |
| Total |           | 30614397 |         | 100.000 |

### <sup>1</sup>H, <sup>13</sup>C NMR of compound **3ga**

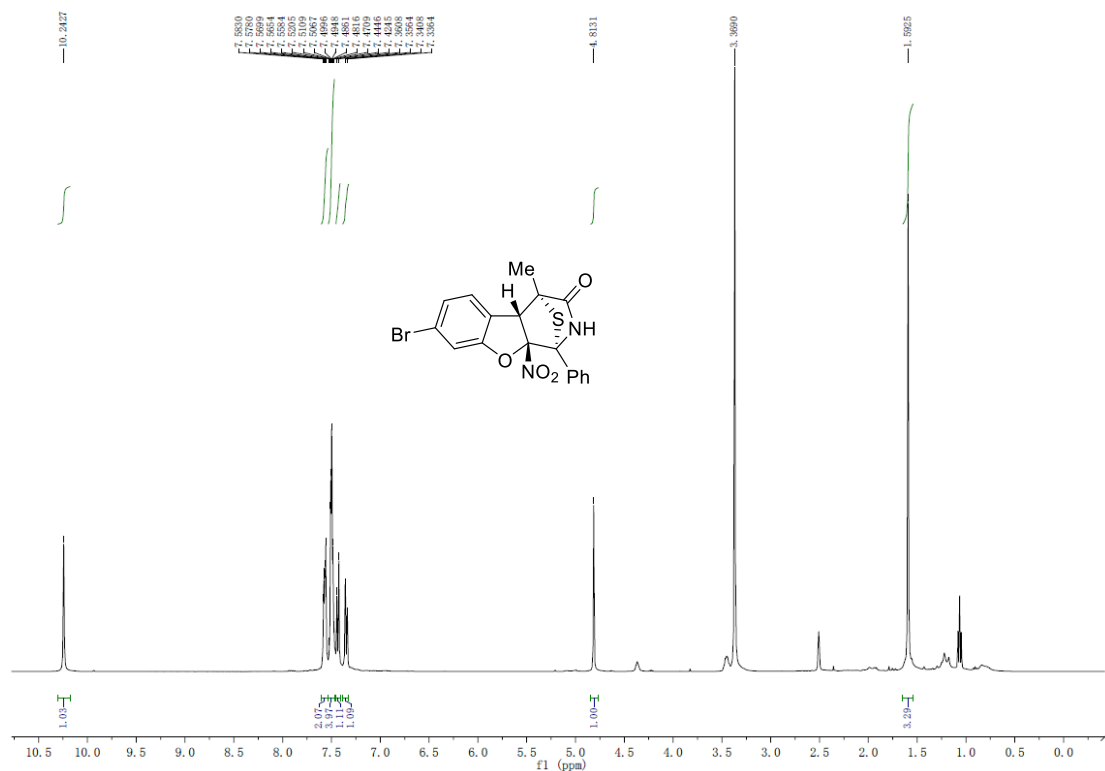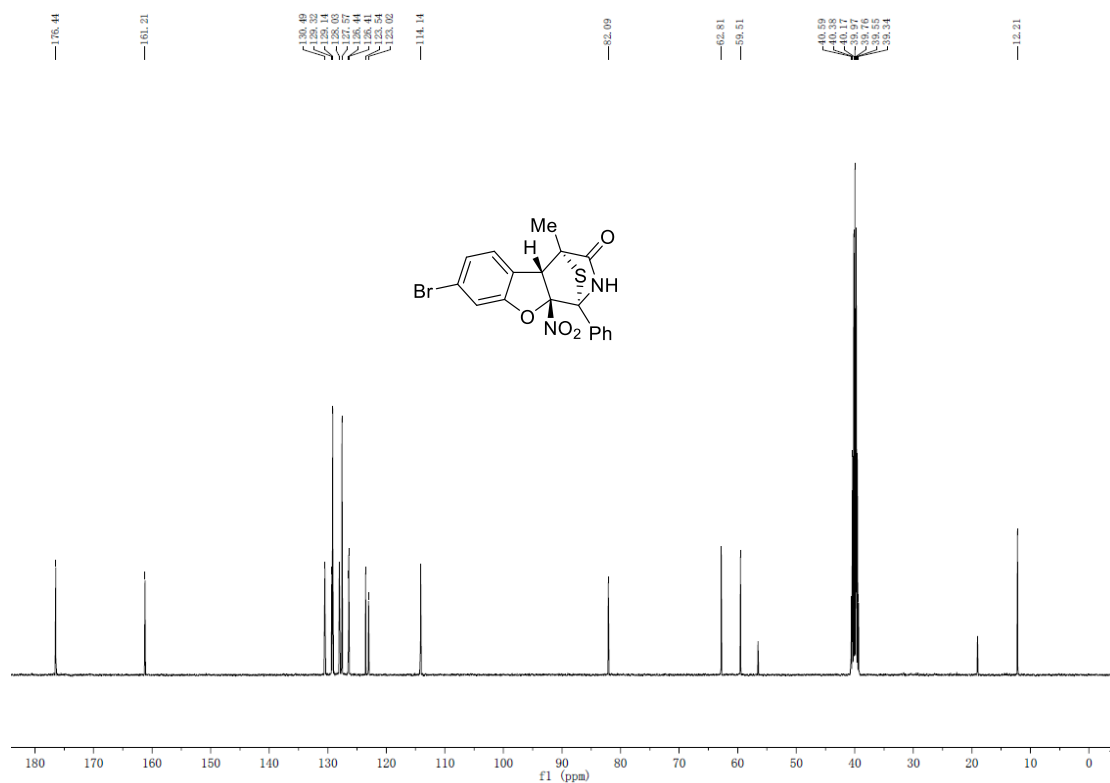

HPLC of compound 3ga

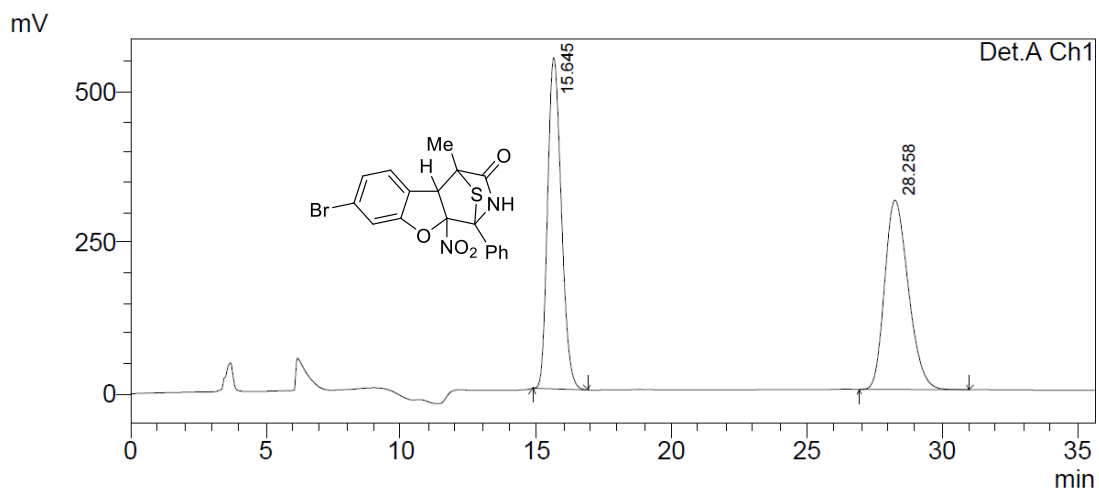

1 Det.A Ch1/220nm

PeakTable

Detector A Ch1 220nm

| Peak# | Ret. Time | Area     | Height | Area %  |
|-------|-----------|----------|--------|---------|
| 1     | 15.645    | 19420022 | 549281 | 50.453  |
| 2     | 28.258    | 19070917 | 314008 | 49.547  |
| Total |           | 38490939 |        | 100.000 |

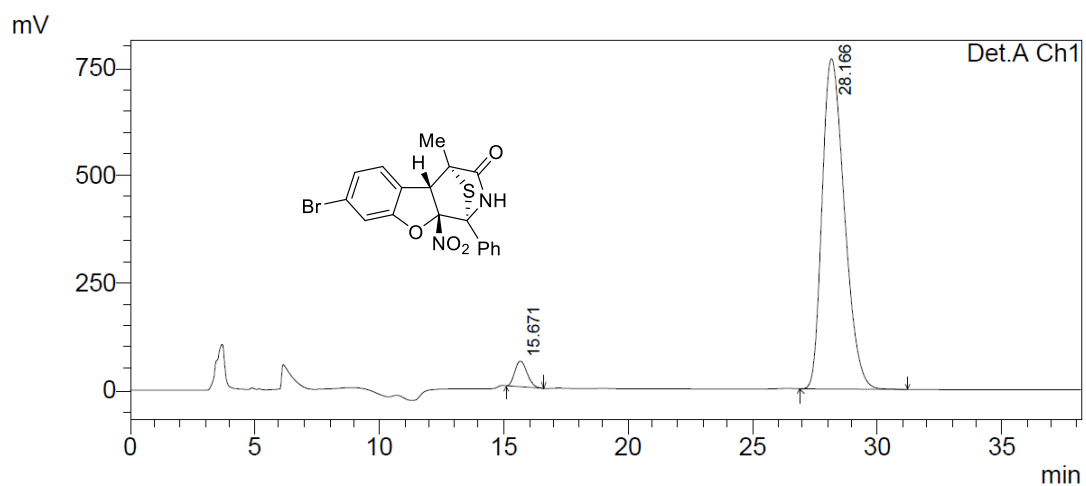

1 Det.A Ch1/220nm

PeakTable

Detector A Ch1 220nm

| Peak# | Ret. Time | Area     | Height | Area %  |
|-------|-----------|----------|--------|---------|
| 1     | 15.671    | 2047054  | 59786  | 4.104   |
| 2     | 28.166    | 47837845 | 767764 | 95.896  |
| Total |           | 49884899 |        | 100.000 |

$^1\text{H}$ ,  $^{13}\text{C}$  NMR of compound **3ha**

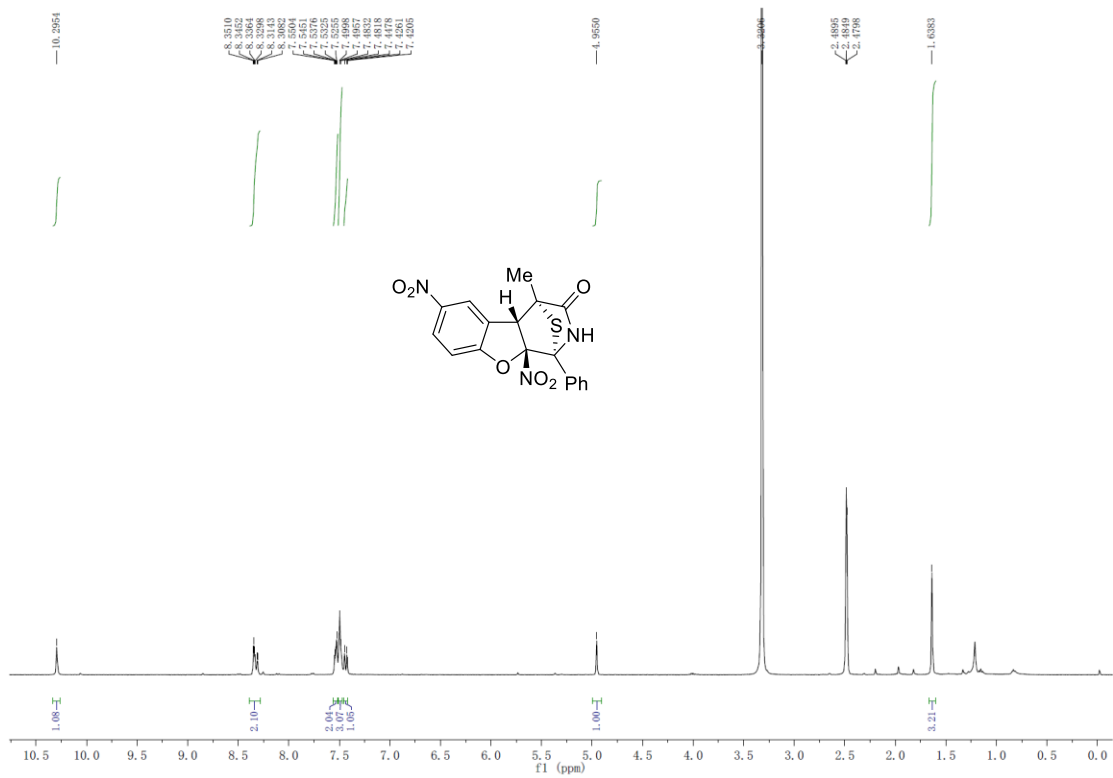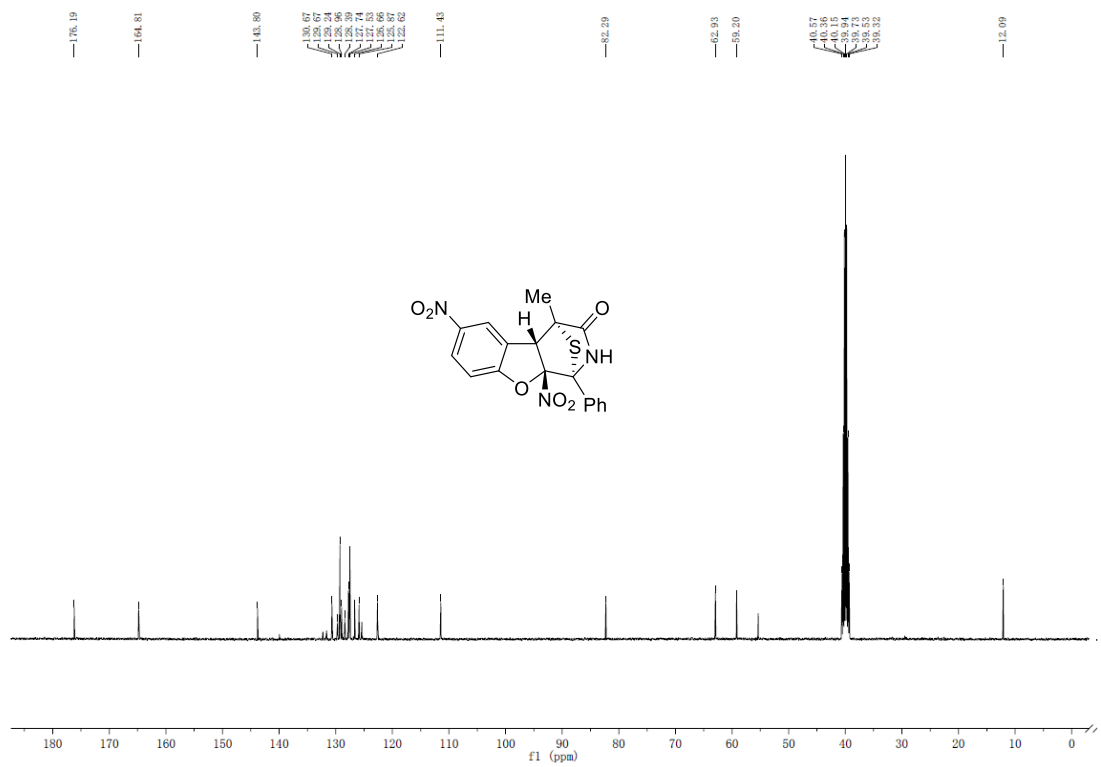

HPLC of compound 3ha

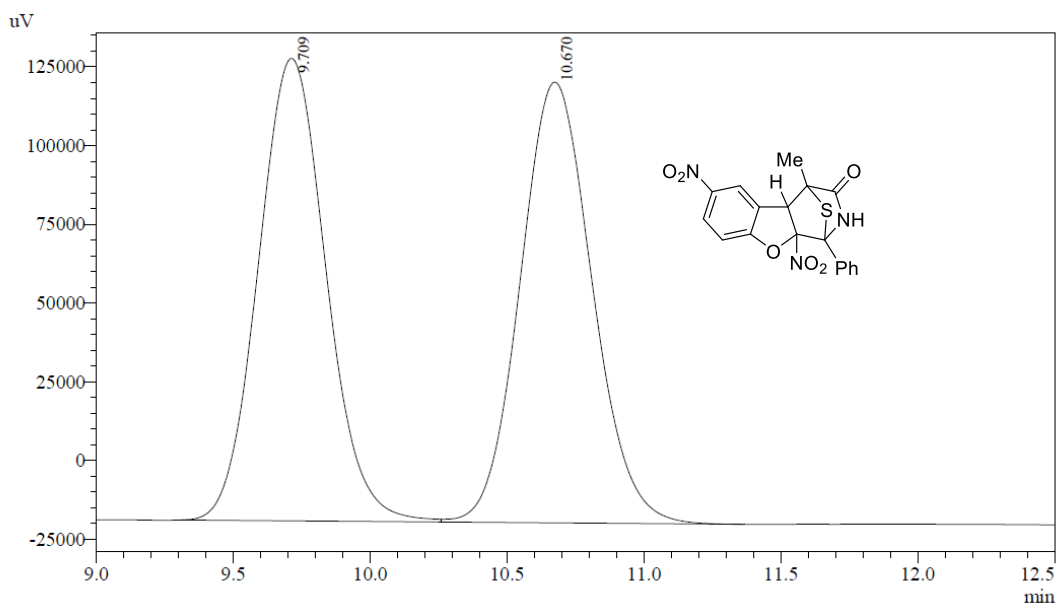

1 Det.A Ch1 / 220nm

Detector A Ch1 220nm

| Peak# | Ret. Time | Area    | Height | Area %  | Height % |
|-------|-----------|---------|--------|---------|----------|
| 1     | 9.709     | 2527321 | 146831 | 49.720  | 51.190   |
| 2     | 10.670    | 2555777 | 140006 | 50.280  | 48.810   |
| Total |           | 5083098 | 286838 | 100.000 | 100.000  |

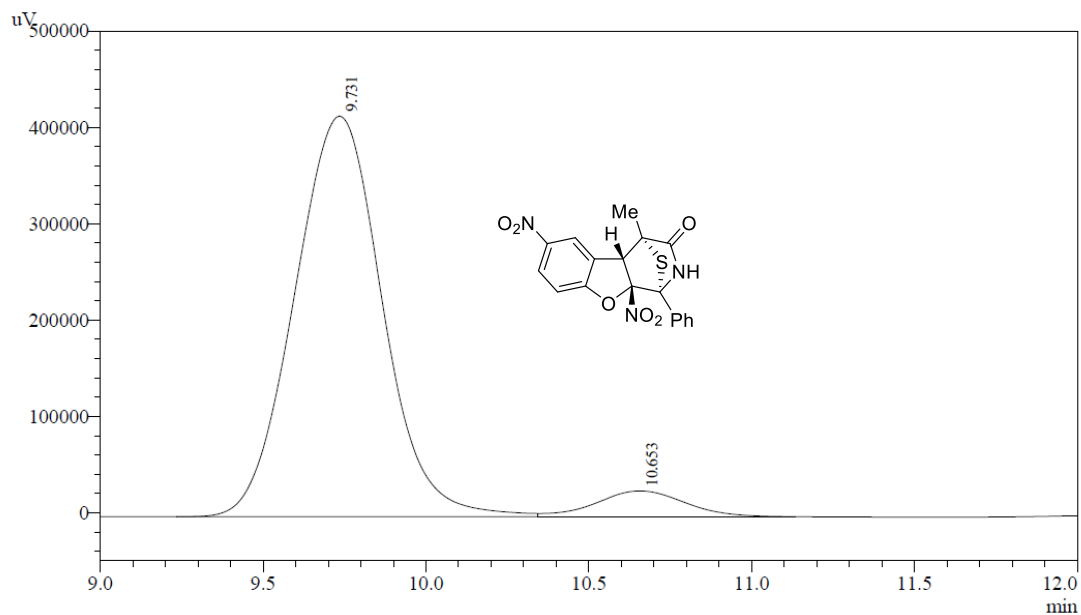

1 Det.A Ch1 / 220nm

Detector A Ch1 220nm

| Peak# | Ret. Time | Area    | Height | Area %  | Height % |
|-------|-----------|---------|--------|---------|----------|
| 1     | 9.731     | 7783316 | 415656 | 93.860  | 93.926   |
| 2     | 10.653    | 509143  | 26879  | 6.140   | 6.074    |
| Total |           | 8292459 | 442535 | 100.000 | 100.000  |

<sup>1</sup>H, <sup>13</sup>C NMR of compound **3ia**

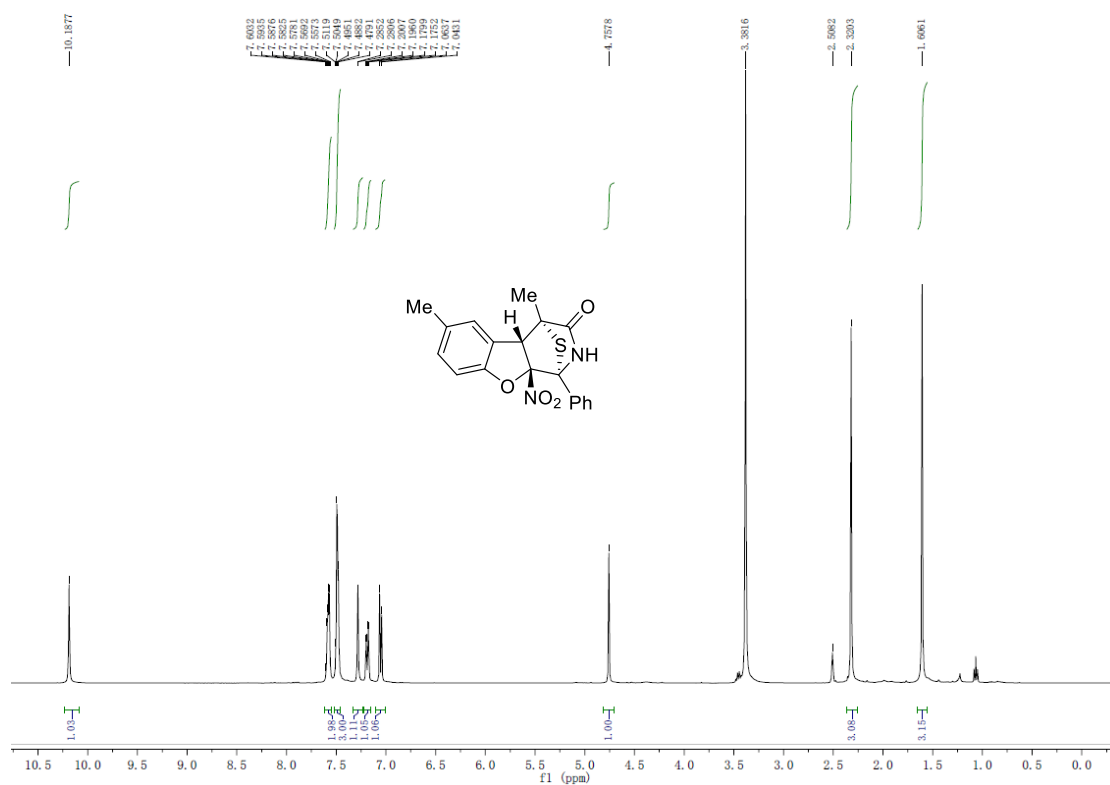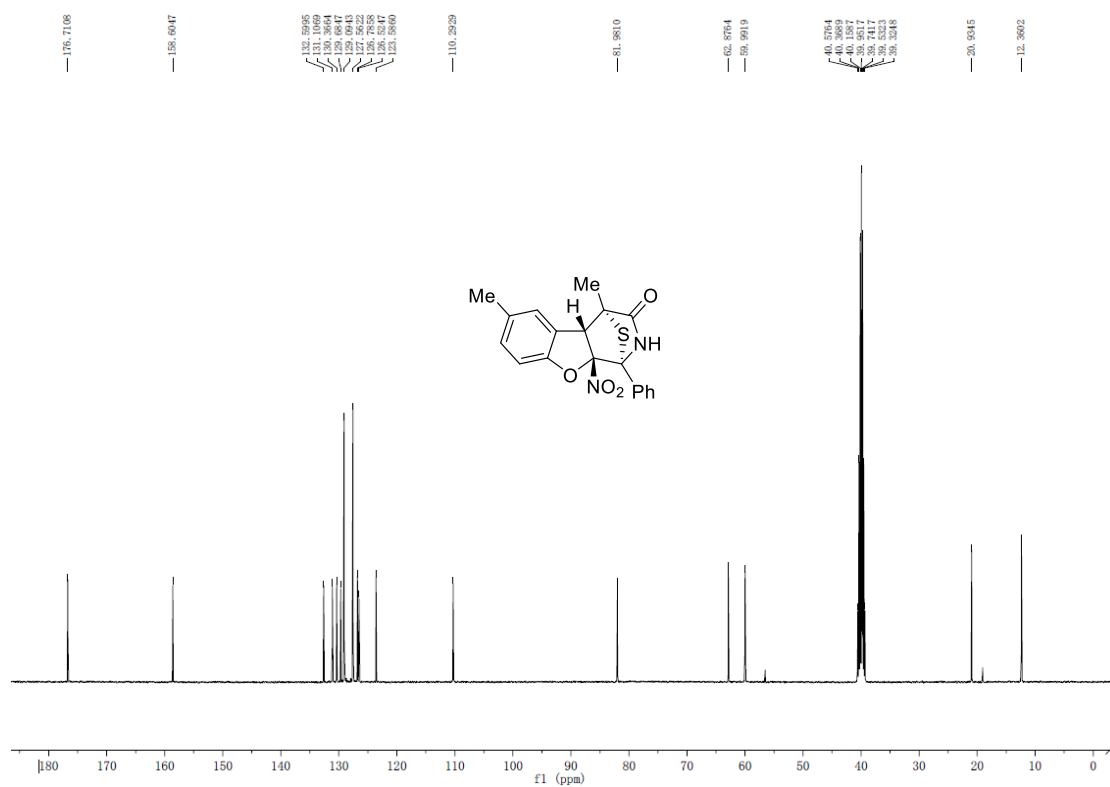

### HPLC of compound **3ia**

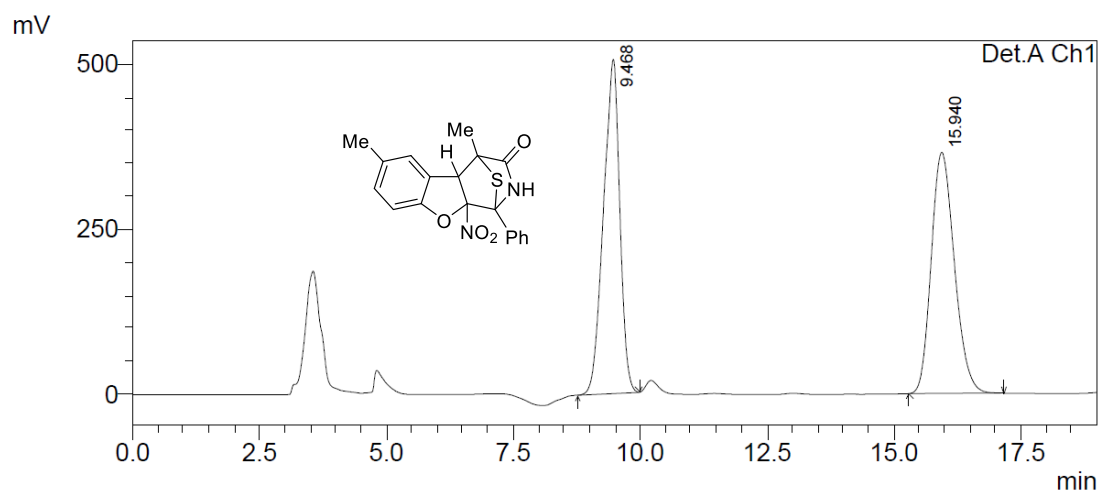

PeakTable

Detector A Ch1 220nm

| Peak# | Ret. Time | Area     | Height | Area %  |
|-------|-----------|----------|--------|---------|
| 1     | 9.468     | 11313175 | 505500 | 49.427  |
| 2     | 15.940    | 11575644 | 364415 | 50.573  |
| Total |           | 22888819 |        | 100.000 |

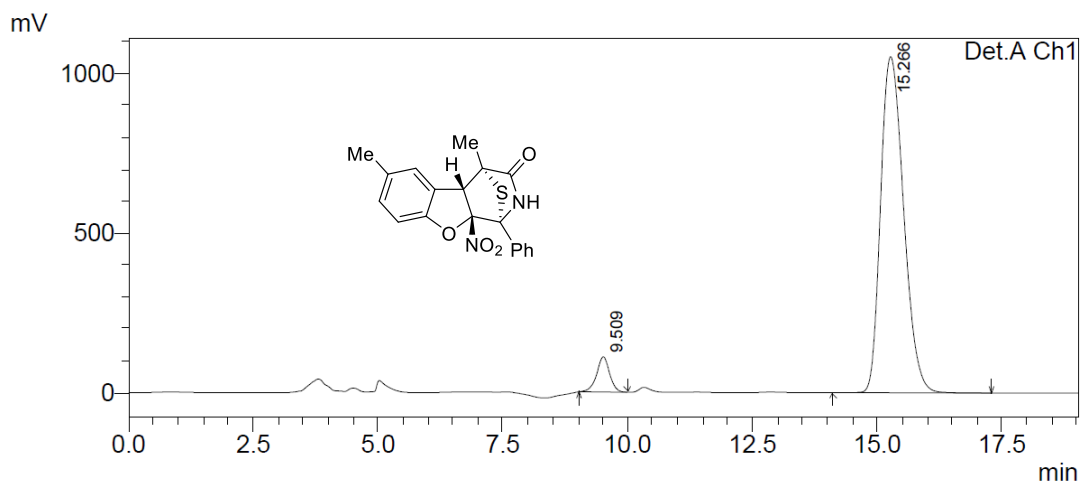

PeakTable

Detector A Ch1 220nm

| Peak# | Ret. Time | Area     | Height  | Area %  |
|-------|-----------|----------|---------|---------|
| 1     | 9.509     | 1992468  | 110351  | 5.569   |
| 2     | 15.266    | 33786476 | 1053149 | 94.431  |
| Total |           | 35778944 |         | 100.000 |

# $^1\text{H}$ , $^{13}\text{C}$ NMR of compound **3ja**

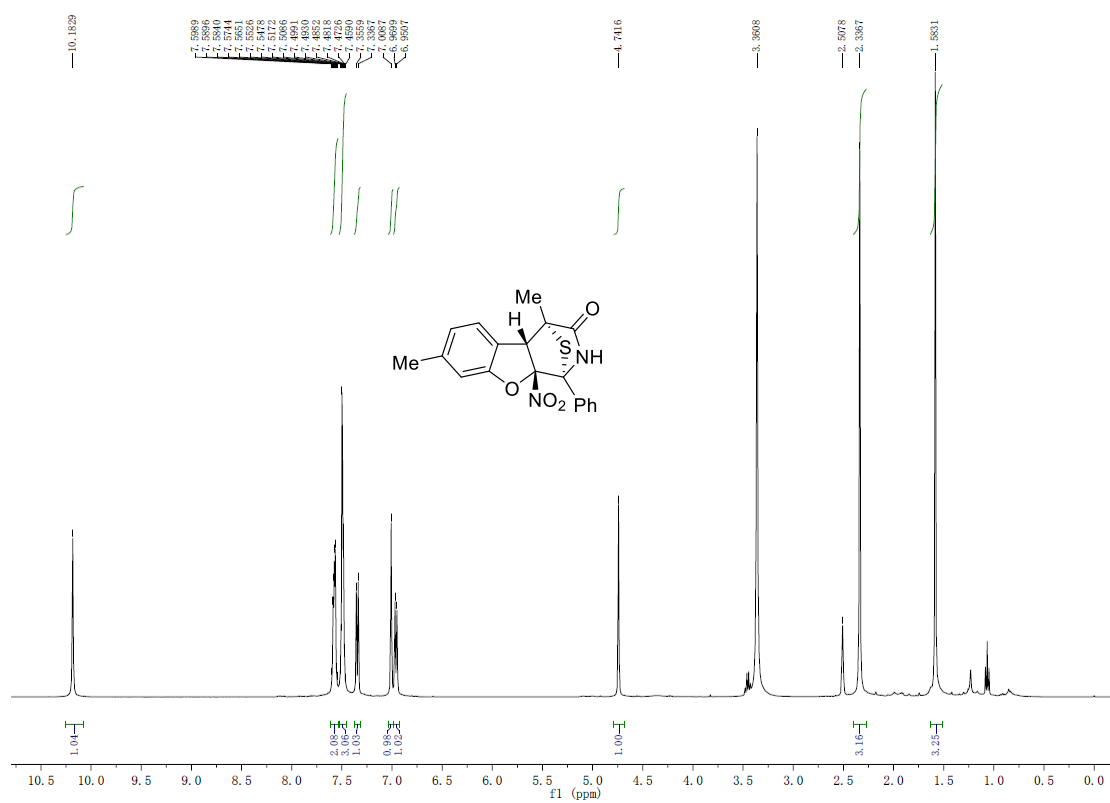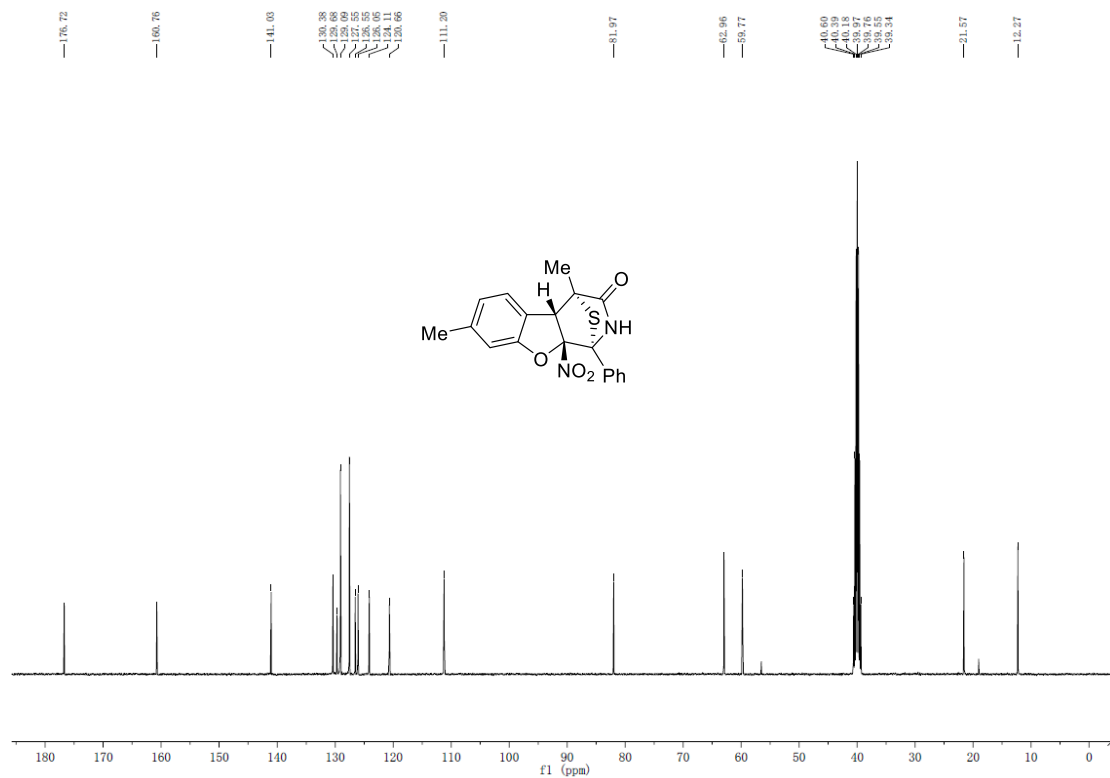



### HPLC of compound 3ja

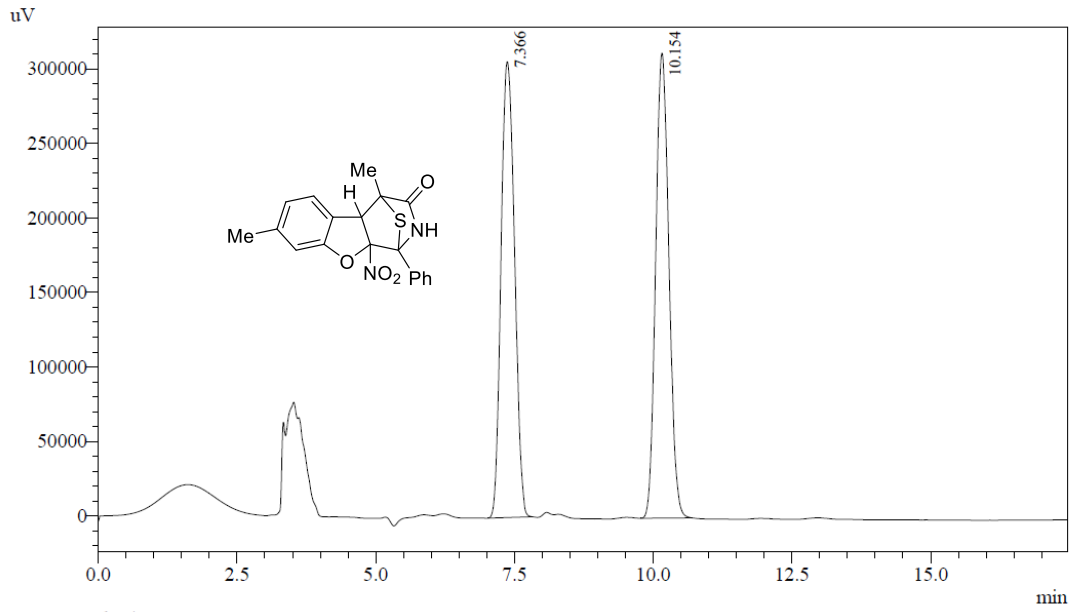

Detector A Ch1 220nm

| Peak# | Ret. Time | Area     | Height | Area %  | Height % |
|-------|-----------|----------|--------|---------|----------|
| 1     | 7.366     | 5180674  | 305862 | 49.979  | 49.499   |
| 2     | 10.154    | 5185075  | 312053 | 50.021  | 50.501   |
| Total |           | 10365749 | 617915 | 100.000 | 100.000  |

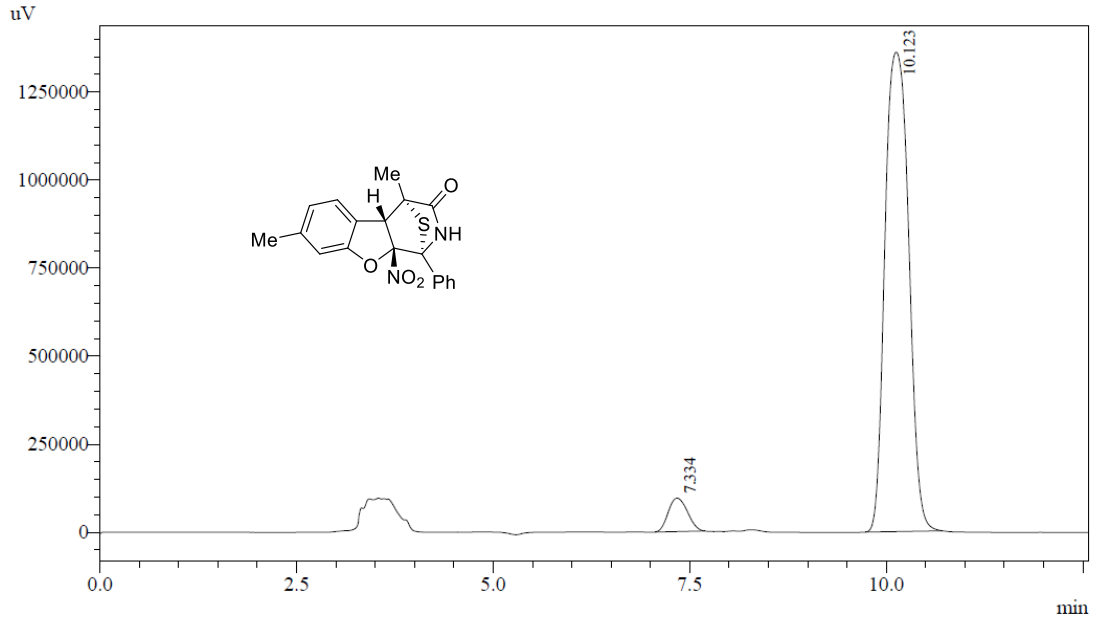

Detector A Ch1 220nm

| Peak# | Ret. Time | Area     | Height  | Area %  | Height % |
|-------|-----------|----------|---------|---------|----------|
| 1     | 7.334     | 1610690  | 94998   | 5.320   | 6.524    |
| 2     | 10.123    | 28667322 | 1361040 | 94.680  | 93.476   |
| Total |           | 30278012 | 1456038 | 100.000 | 100.000  |

# $^1\text{H}$ , $^{13}\text{C}$ NMR of compound **3ka**

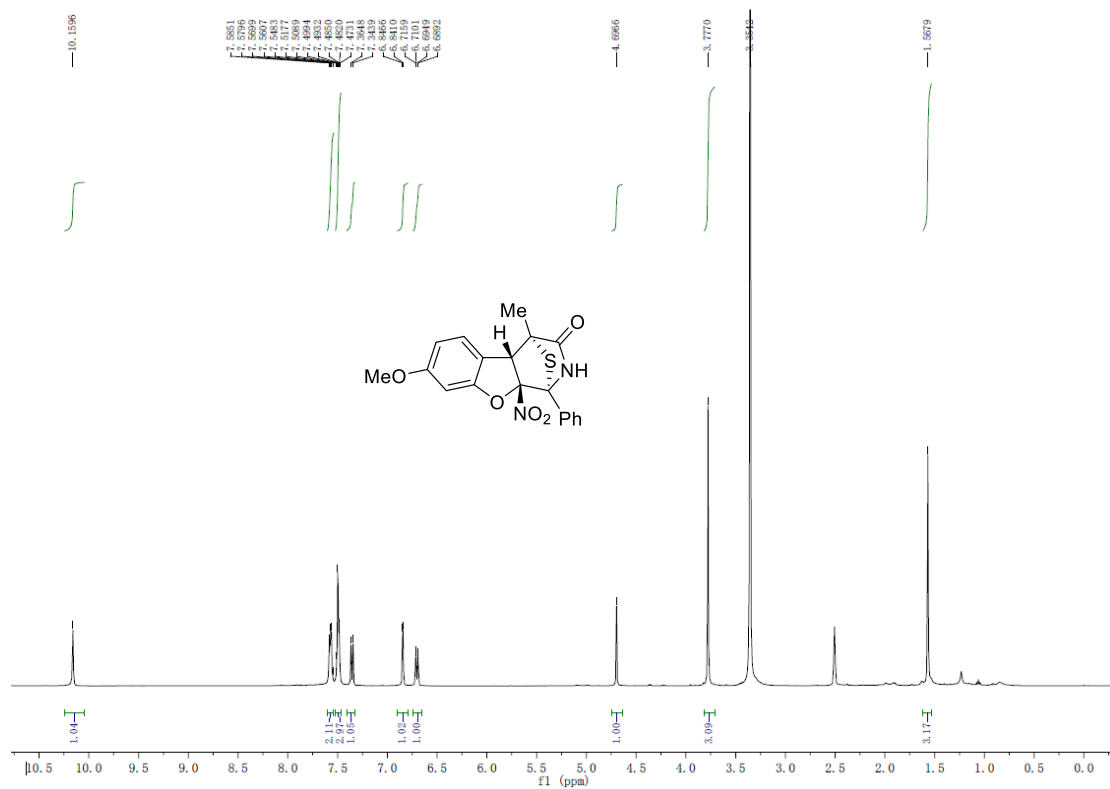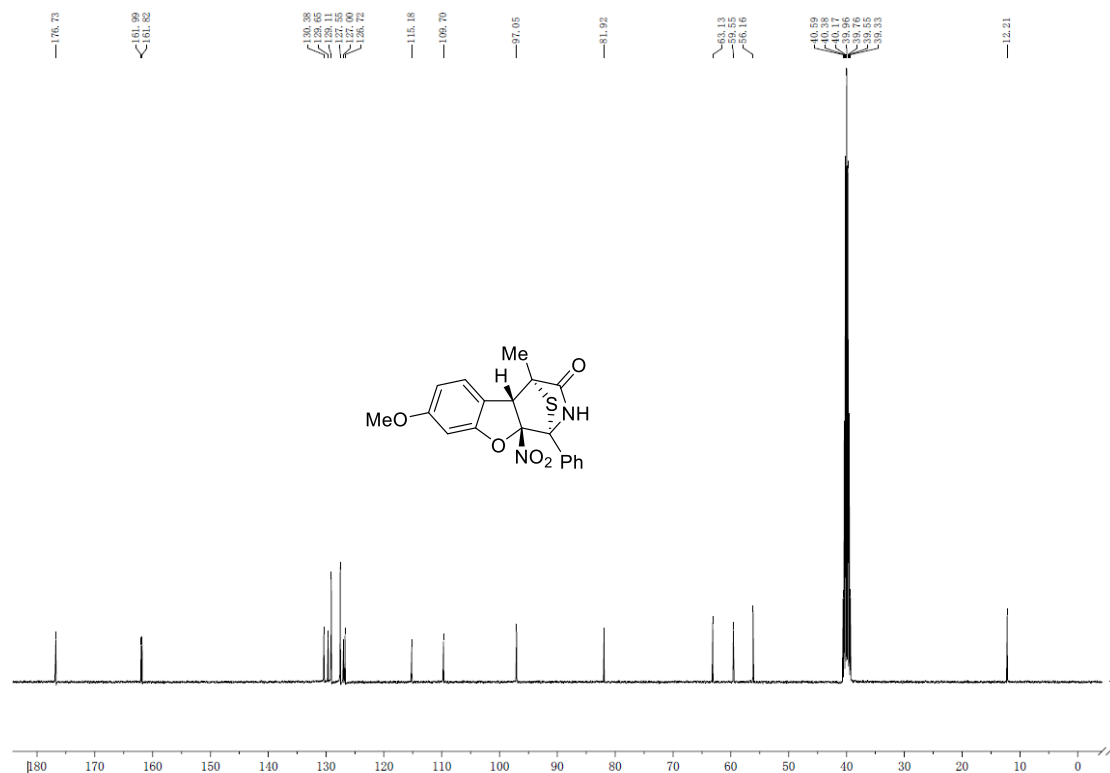

### HPLC of compound 3ka

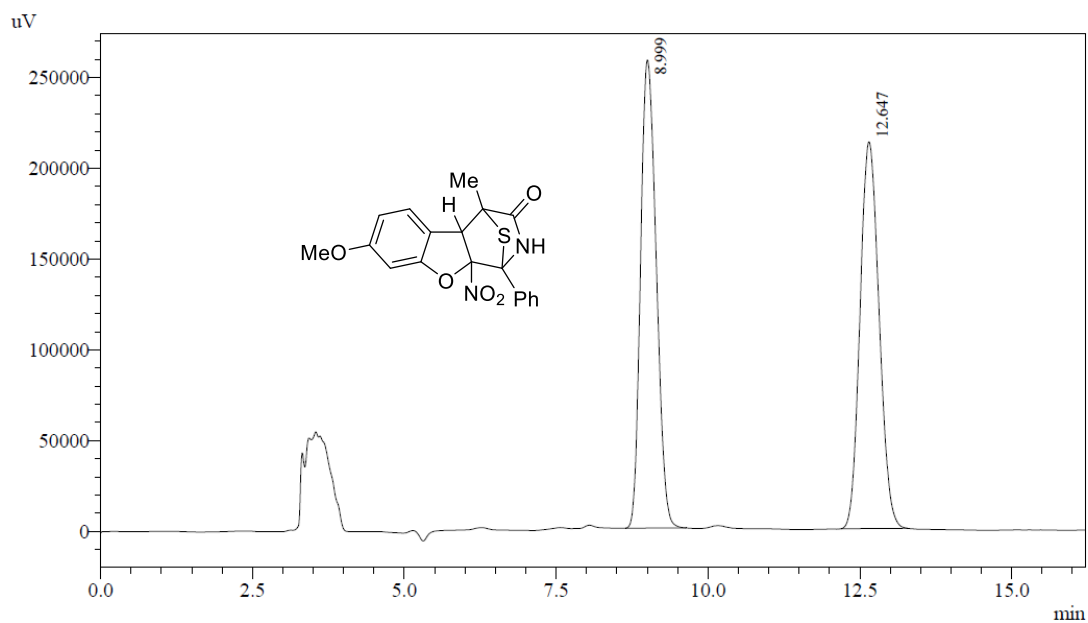

Detector A Ch1 220nm

| Peak# | Ret. Time | Area    | Height | Area %  | Height % |
|-------|-----------|---------|--------|---------|----------|
| 1     | 8.999     | 4643193 | 257880 | 49.944  | 54.754   |
| 2     | 12.647    | 4653547 | 213104 | 50.056  | 45.246   |
| Total |           | 9296741 | 470984 | 100.000 | 100.000  |

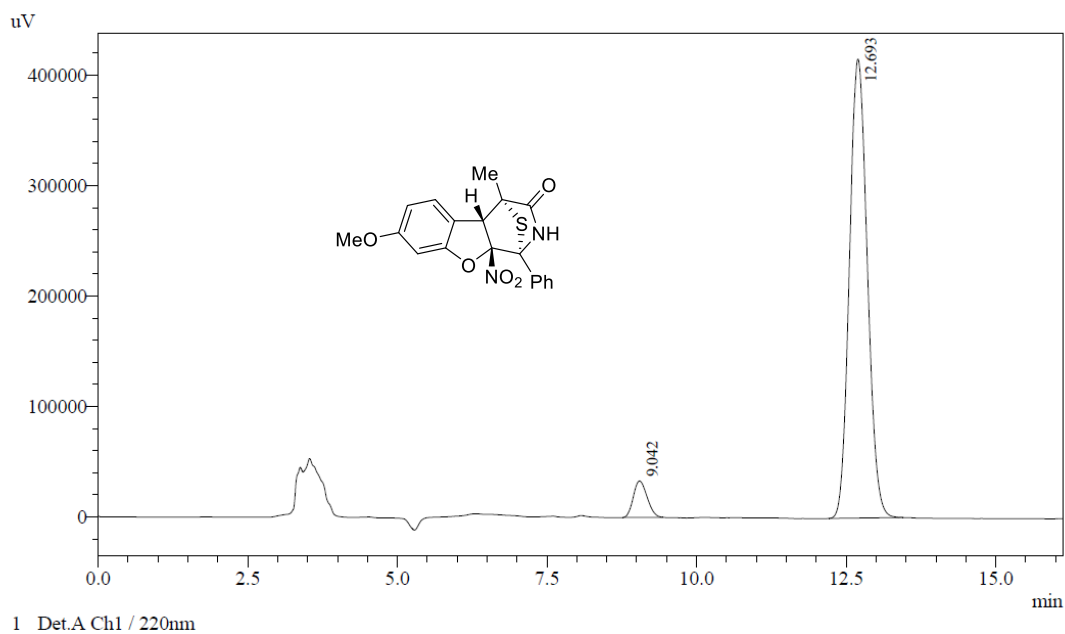

Detector A Ch1 220nm

| Peak# | Ret. Time | Area    | Height | Area %  | Height % |
|-------|-----------|---------|--------|---------|----------|
| 1     | 9.042     | 529166  | 33042  | 5.757   | 7.362    |
| 2     | 12.693    | 8663183 | 415762 | 94.243  | 92.638   |
| Total |           | 9192349 | 448804 | 100.000 | 100.000  |

# $^1\text{H}$ , $^{13}\text{C}$ NMR of compound **3a**

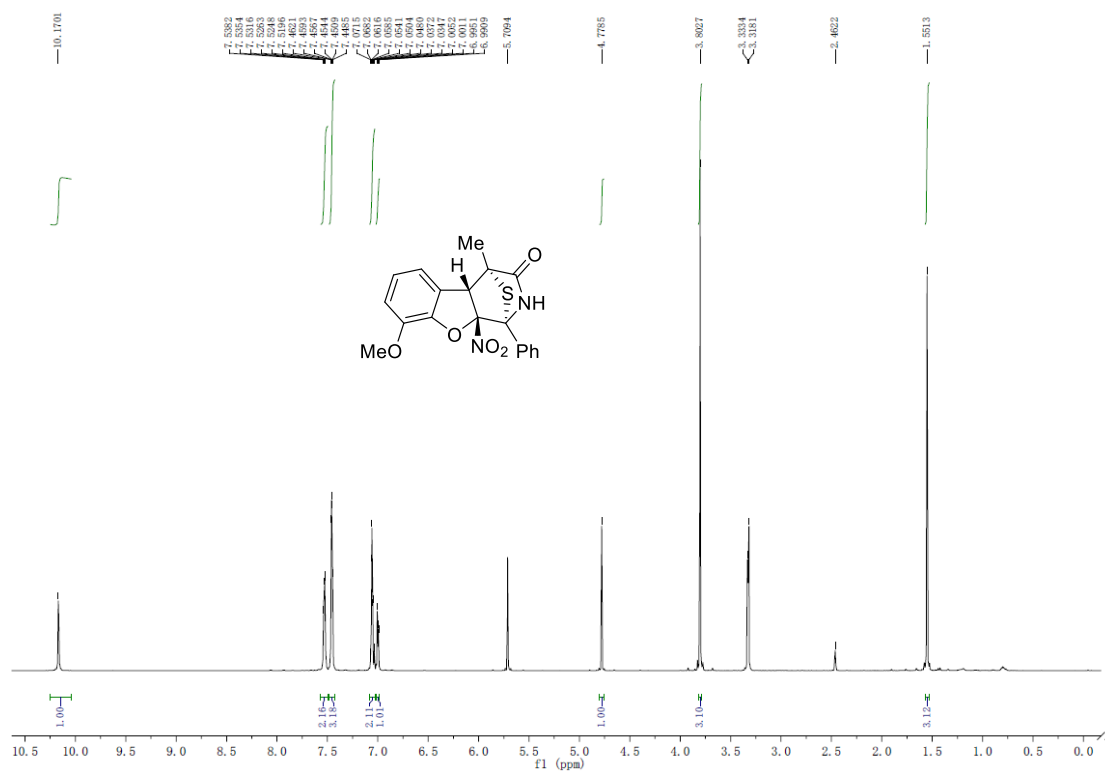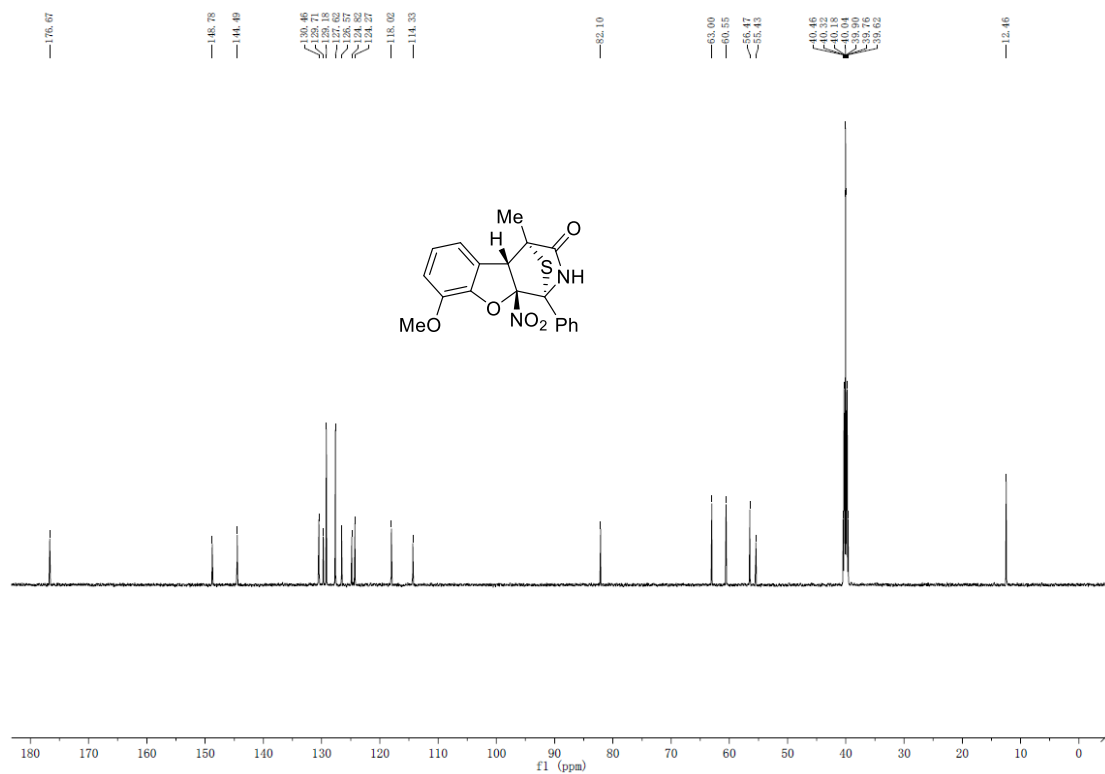

### HPLC of compound 3la

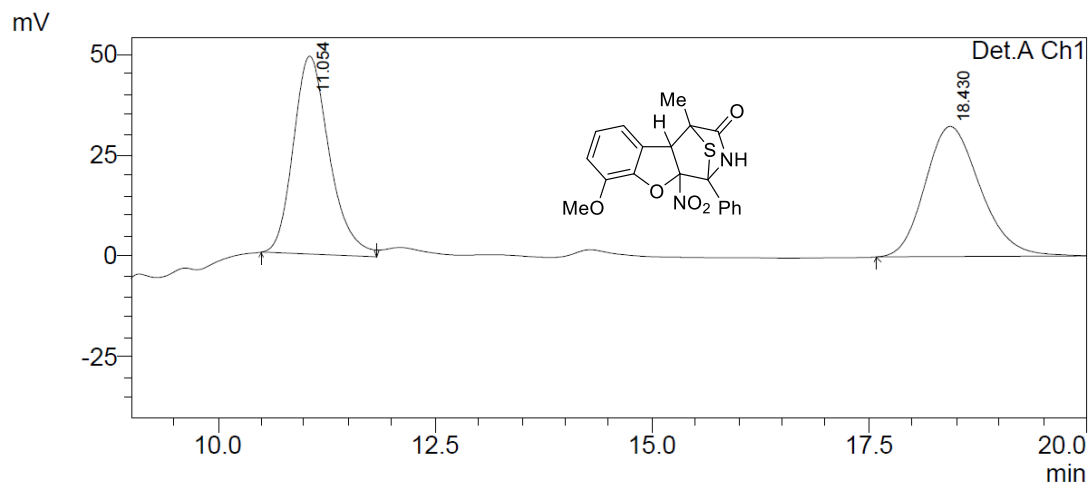

1 Det.A Ch1/220nm

PeakTable

| Detector A Ch1 220nm |           |         |        |         |
|----------------------|-----------|---------|--------|---------|
| Peak#                | Ret. Time | Area    | Height | Area %  |
| 1                    | 11.054    | 1416281 | 48993  | 49.870  |
| 2                    | 18.430    | 1423678 | 32189  | 50.130  |
| Total                |           | 2839959 |        | 100.000 |

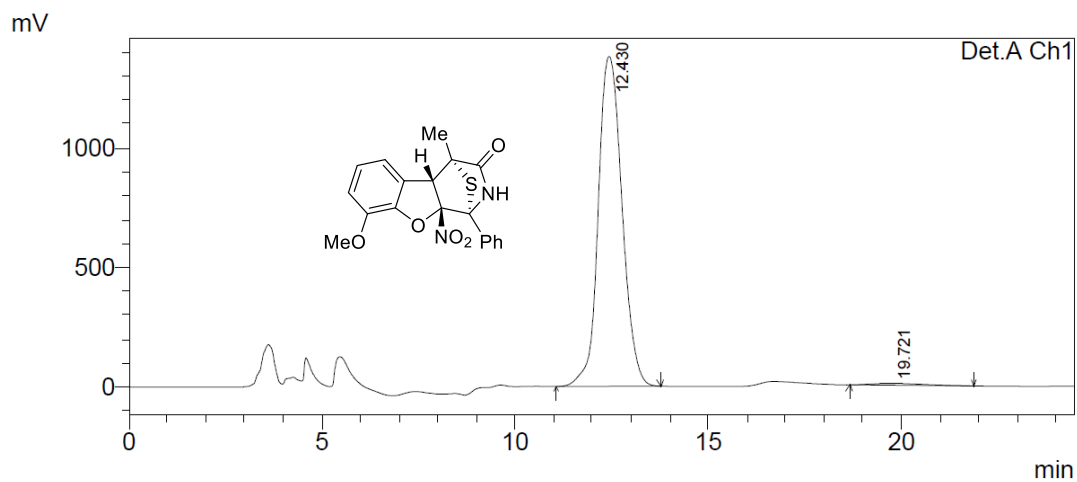

1 Det.A Ch1/220nm

PeakTable

| Detector A Ch1 220nm |           |          |         |         |
|----------------------|-----------|----------|---------|---------|
| Peak#                | Ret. Time | Area     | Height  | Area %  |
| 1                    | 12.430    | 59223134 | 1378349 | 98.734  |
| 2                    | 19.721    | 759396   | 8403    | 1.266   |
| Total                |           | 59982530 |         | 100.000 |

$^1\text{H}$ ,  $^{13}\text{C}$  NMR of compound **3ma**

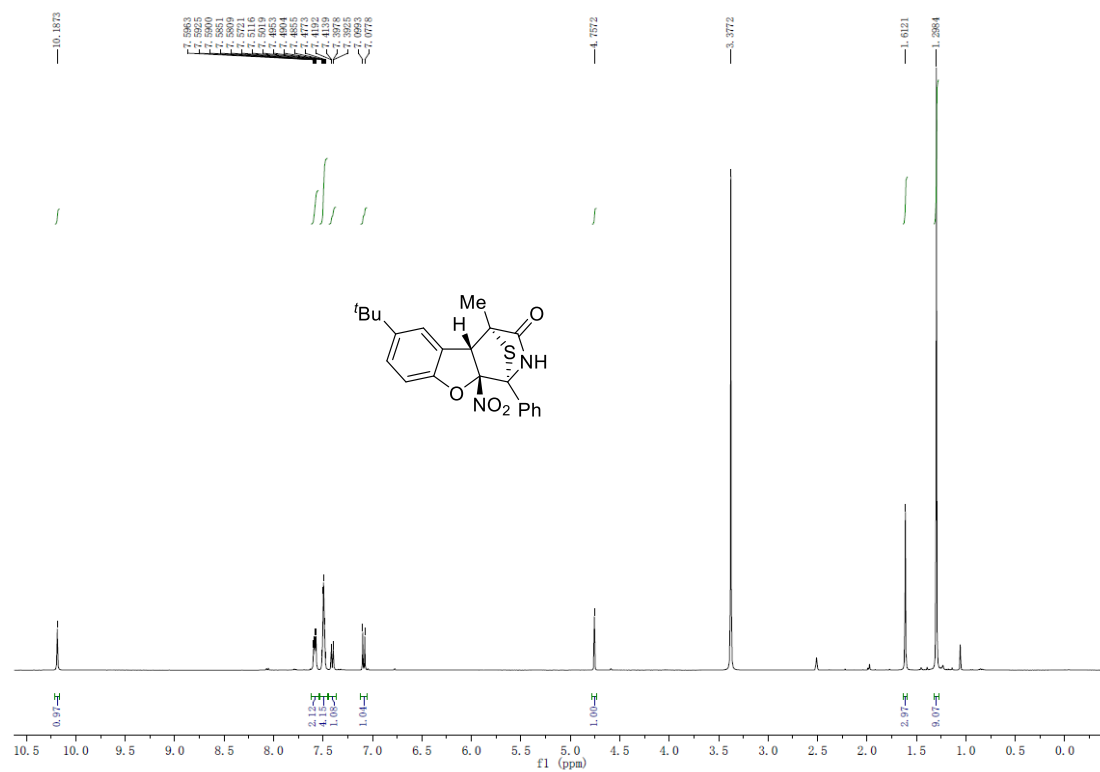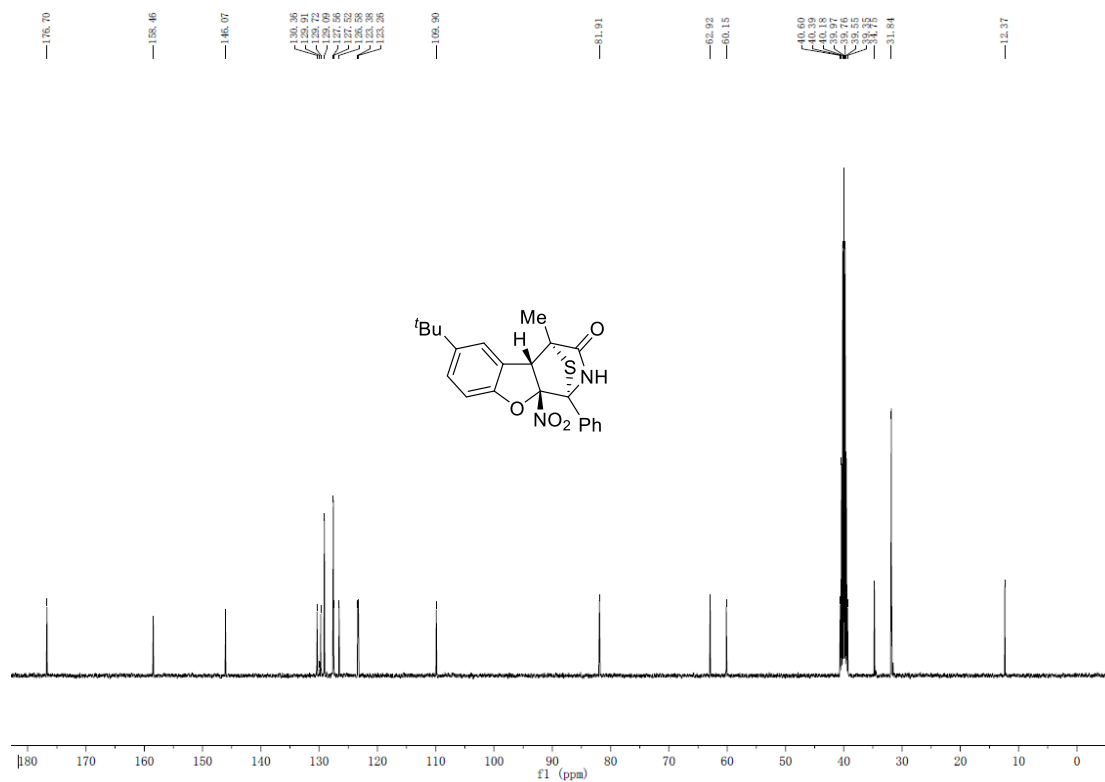

### HPLC of compound **3ma**

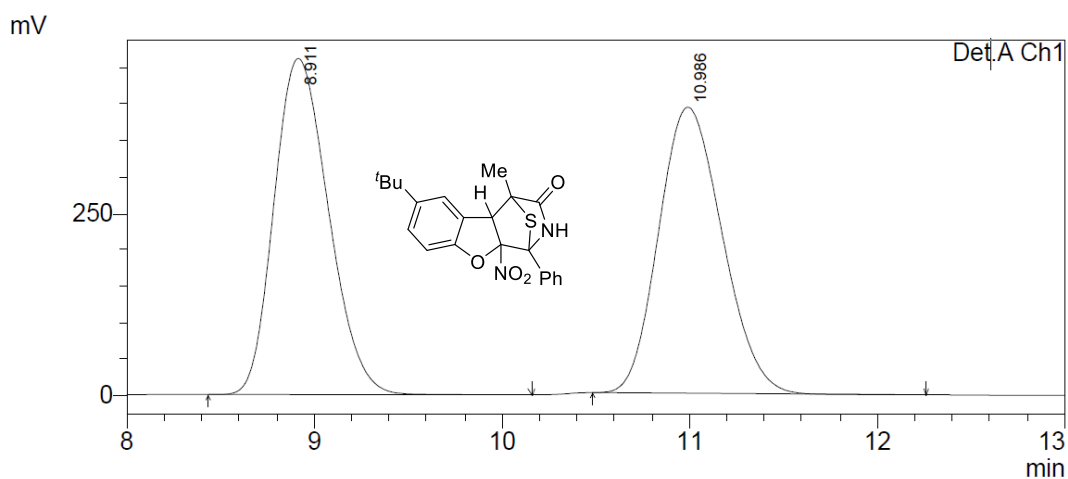

PeakTable

Detector A Ch1 220nm

| Peak# | Ret. Time | Area     | Height | Area %  |
|-------|-----------|----------|--------|---------|
| 1     | 8.911     | 9322069  | 462098 | 50.216  |
| 2     | 10.986    | 9241897  | 393033 | 49.784  |
| Total |           | 18563966 |        | 100.000 |

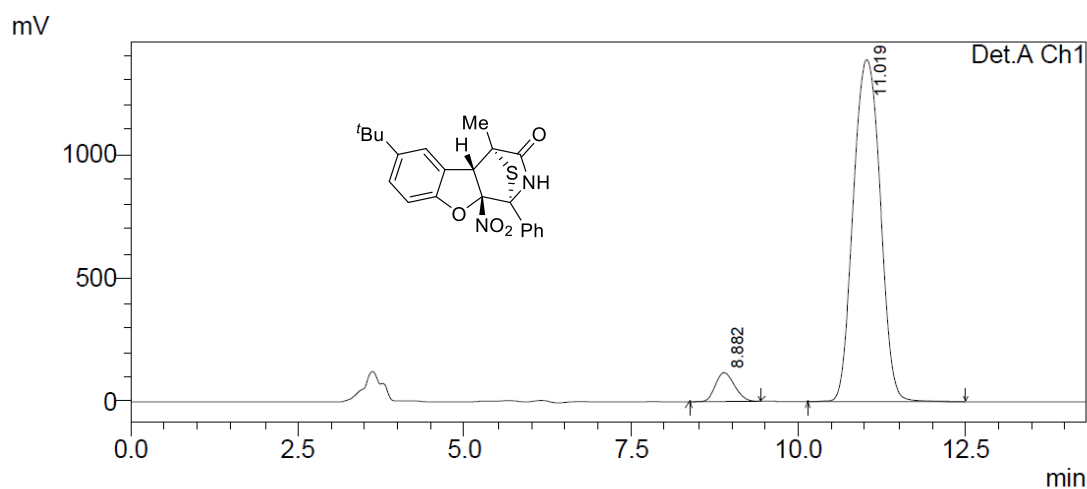

PeakTable

Detector A Ch1 220nm

| Peak# | Ret. Time | Area     | Height  | Area %  |
|-------|-----------|----------|---------|---------|
| 1     | 8.882     | 2326947  | 116822  | 5.640   |
| 2     | 11.019    | 38932882 | 1383017 | 94.360  |
| Total |           | 41259828 |         | 100.000 |

# $^1\text{H}$ , $^{13}\text{C}$ NMR of compound **3na**

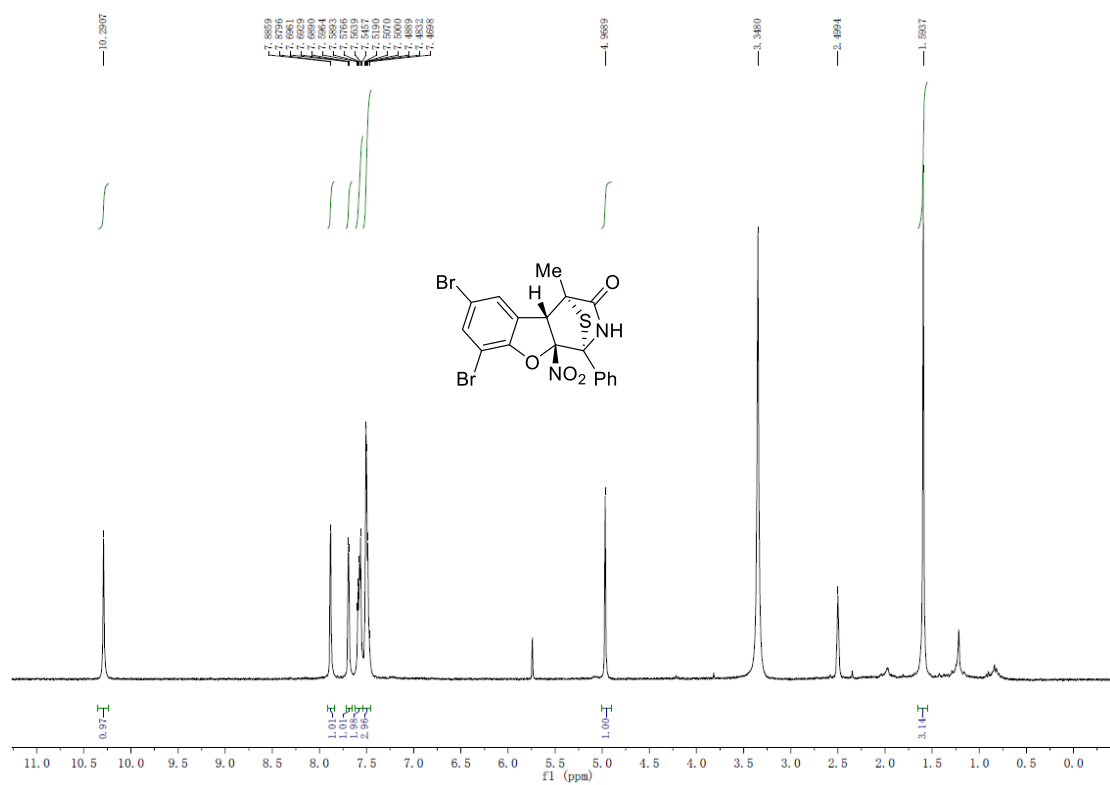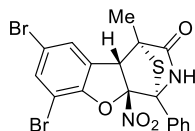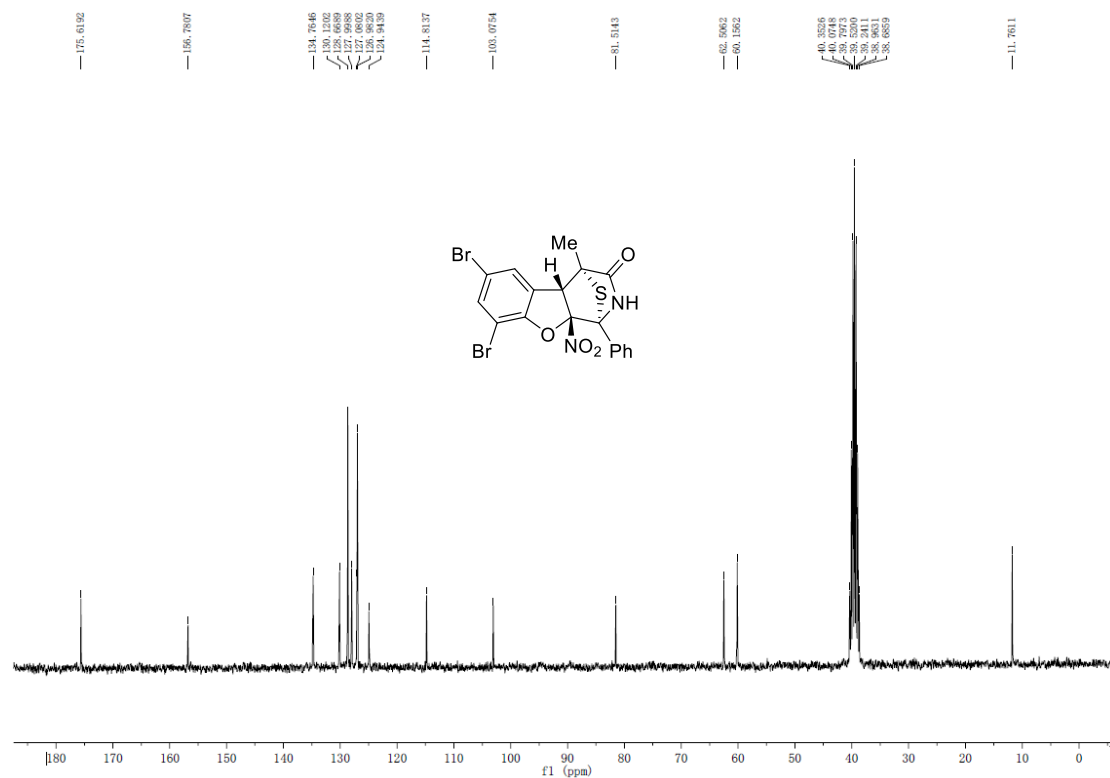



### HPLC of compound **3na**

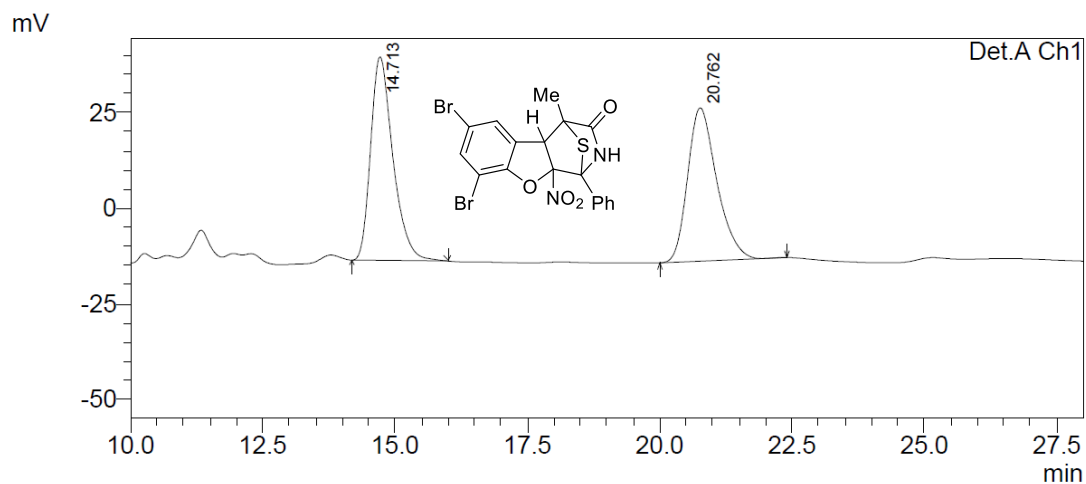

1 Det.A Ch1/220nm

PeakTable

| Peak# | Ret. Time | Area    | Height | Area %  |
|-------|-----------|---------|--------|---------|
| 1     | 14.713    | 1561177 | 53247  | 50.396  |
| 2     | 20.762    | 1536619 | 40105  | 49.604  |
| Total |           | 3097796 |        | 100.000 |

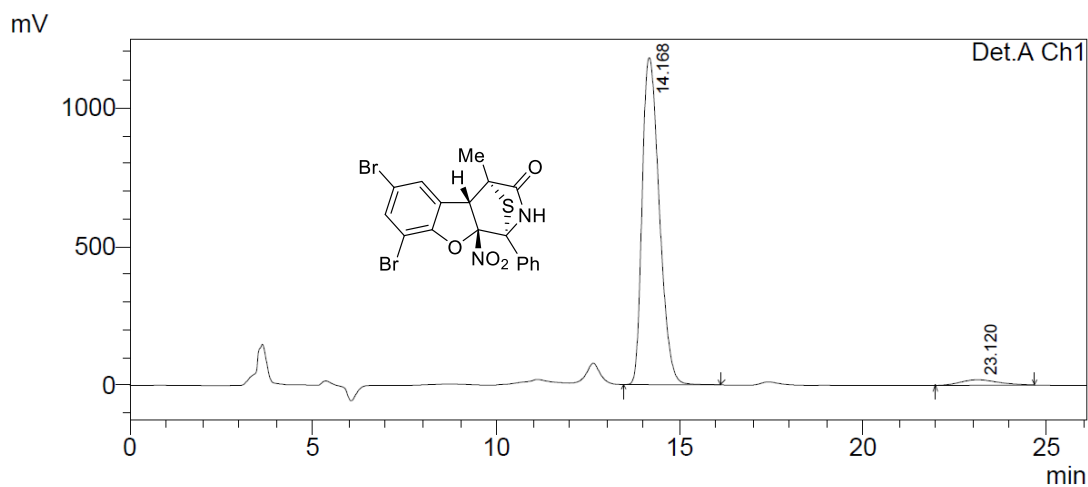

1 Det.A Ch1/220nm

PeakTable

| Peak# | Ret. Time | Area     | Height  | Area %  |
|-------|-----------|----------|---------|---------|
| 1     | 14.168    | 38255273 | 1175999 | 96.495  |
| 2     | 23.120    | 1389593  | 19583   | 3.505   |
| Total |           | 39644866 |         | 100.000 |

# $^1\text{H}$ , $^{13}\text{C}$ NMR of compound **30a**

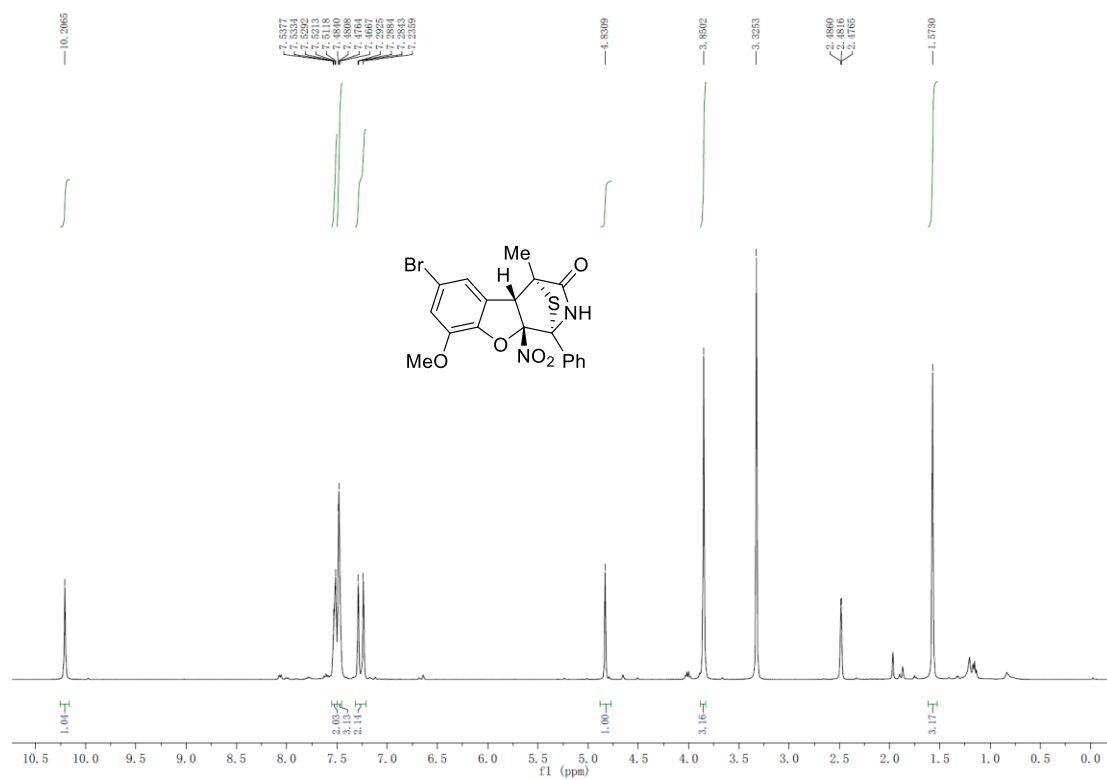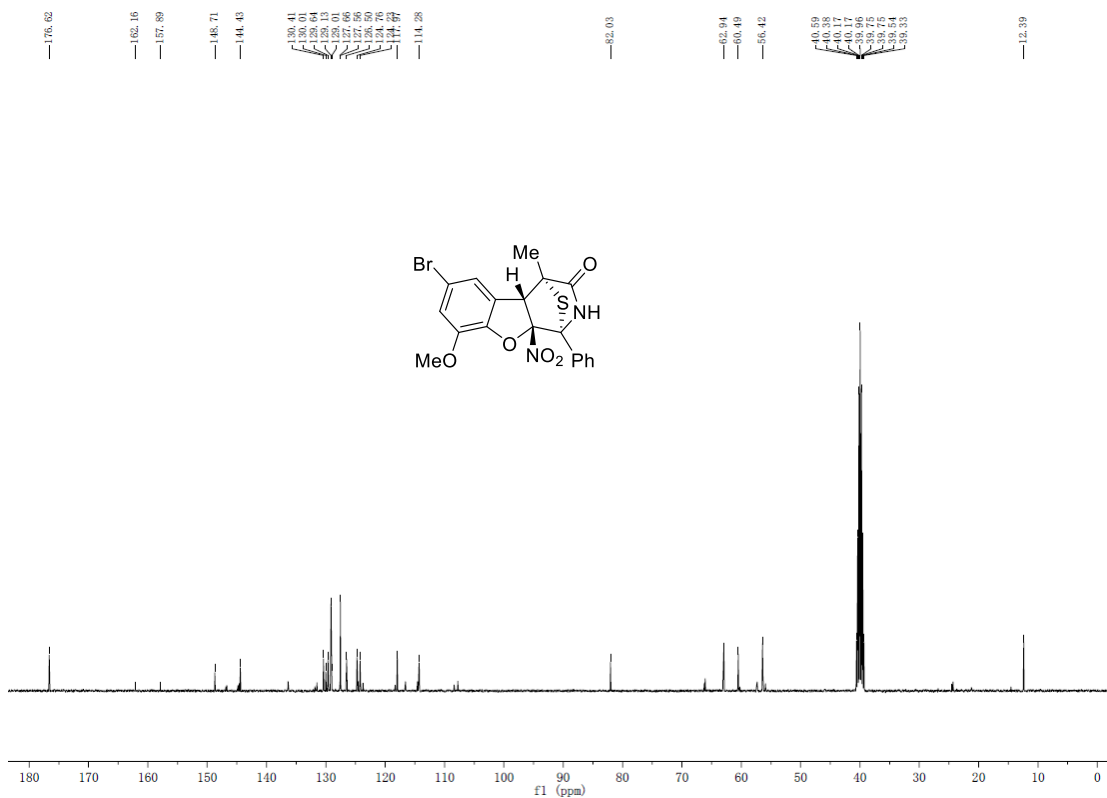

### HPLC of compound 30a

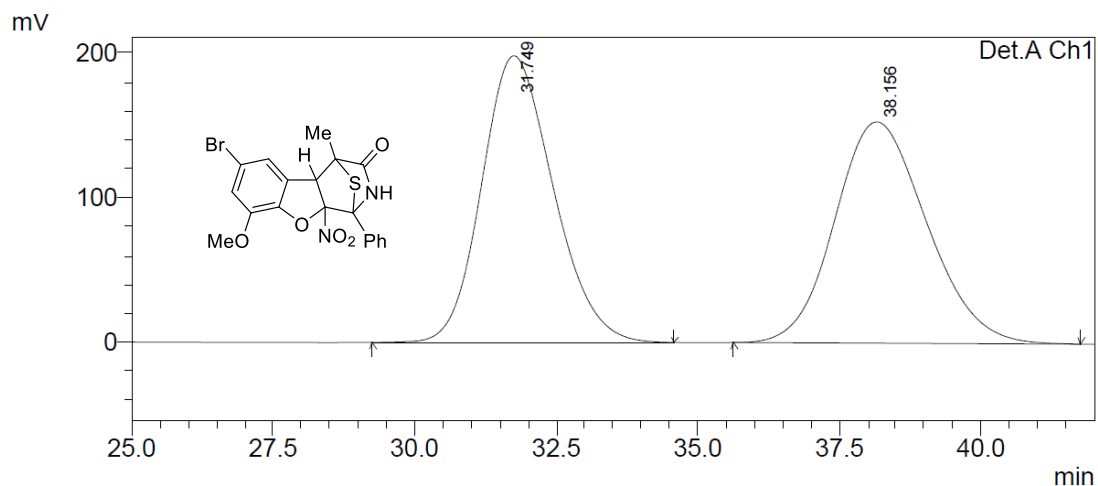

PeakTable

Detector A Ch1 220nm

| Peak# | Ret. Time | Area     | Height | Area %  |
|-------|-----------|----------|--------|---------|
| 1     | 31.749    | 17403710 | 198119 | 50.149  |
| 2     | 38.156    | 17299961 | 152986 | 49.851  |
| Total |           | 34703671 |        | 100.000 |

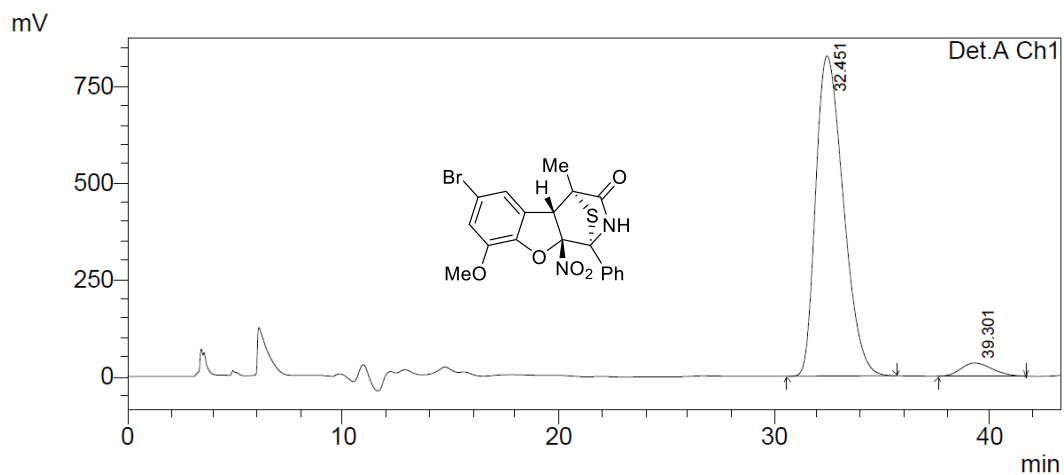

PeakTable

Detector A Ch1 220nm

| Peak# | Ret. Time | Area     | Height | Area %  |
|-------|-----------|----------|--------|---------|
| 1     | 32.451    | 73691537 | 827009 | 95.525  |
| 2     | 39.301    | 3451910  | 34085  | 4.475   |
| Total |           | 77143447 |        | 100.000 |

# $^1\text{H}$ , $^{13}\text{C}$ NMR of compound **3ab**

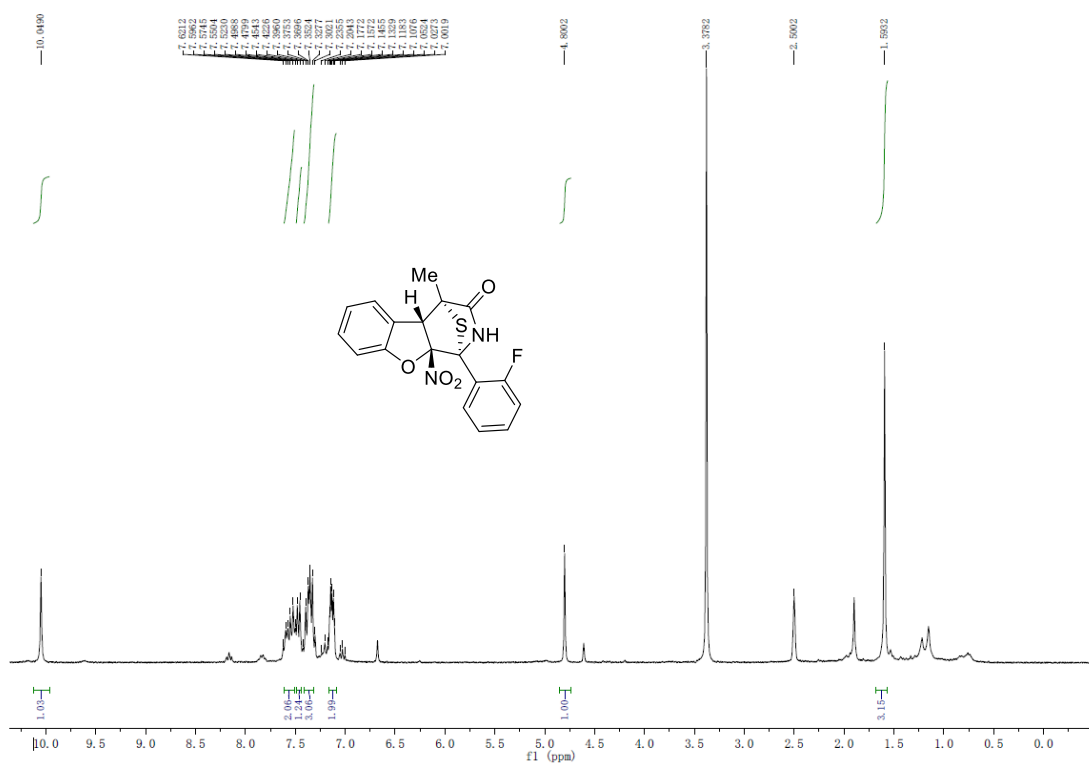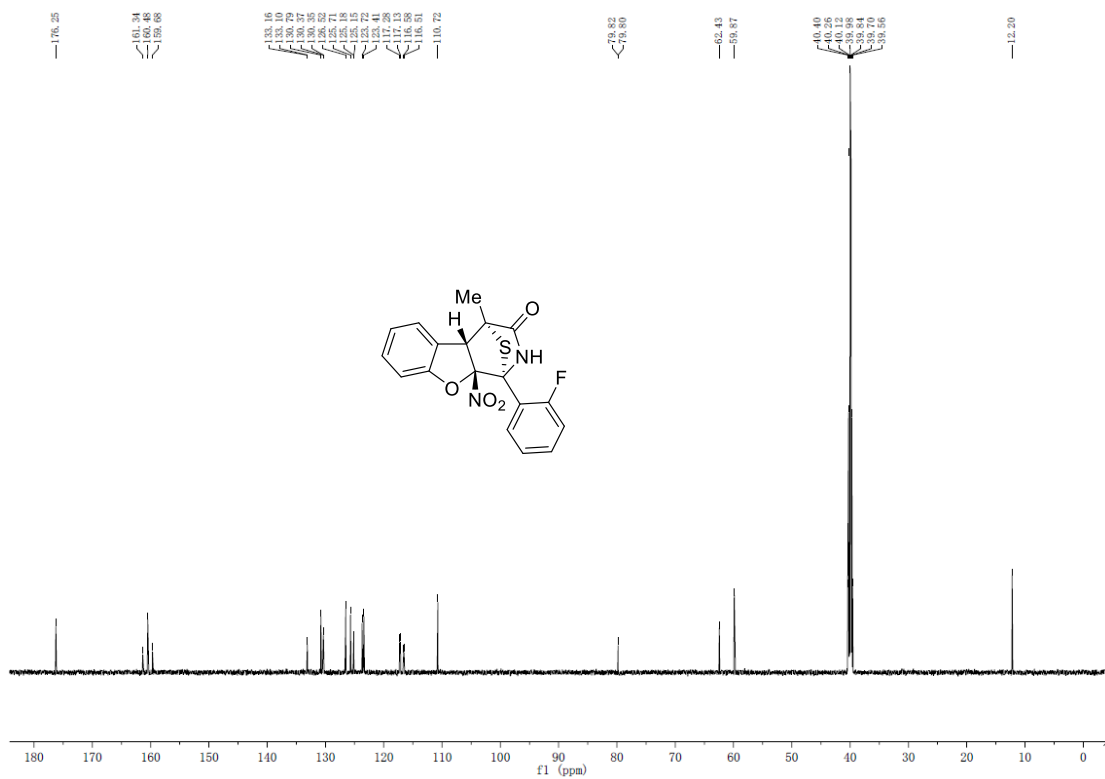

### HPLC of compound **3ab**

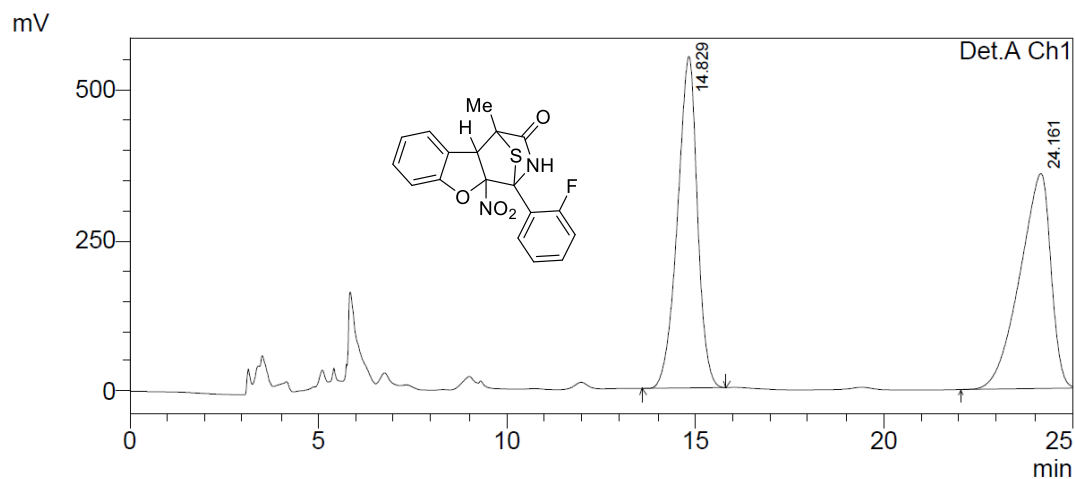

1 Det.A Ch1/254nm

PeakTable

Detector A Ch1 254nm

| Peak# | Ret. Time | Area     | Height | Area %  |
|-------|-----------|----------|--------|---------|
| 1     | 14.829    | 20224244 | 549728 | 49.708  |
| 2     | 24.161    | 20461943 | 356693 | 50.292  |
| Total |           | 40686187 |        | 100.000 |

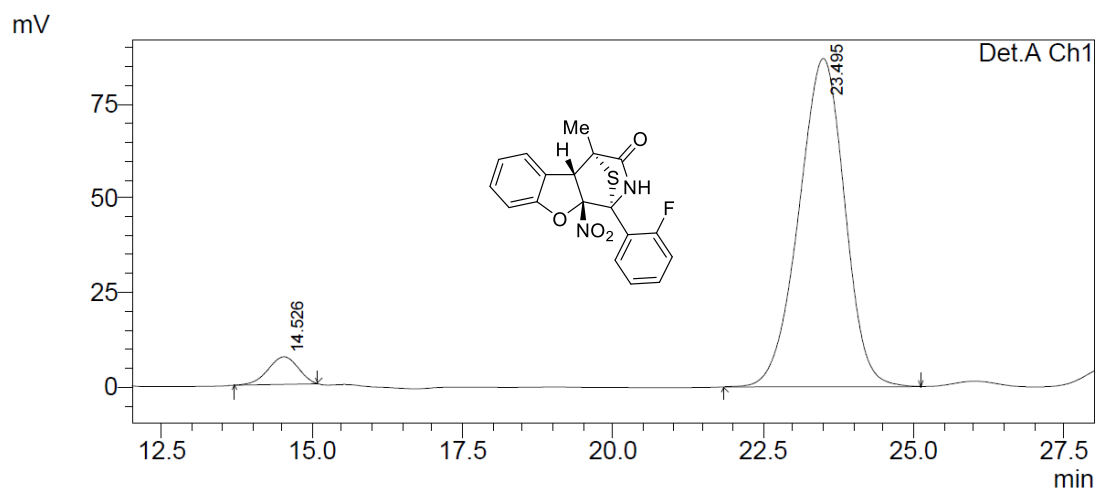

1 Det.A Ch1/254nm

PeakTable

Detector A Ch1 254nm

| Peak# | Ret. Time | Area    | Height | Area %  |
|-------|-----------|---------|--------|---------|
| 1     | 14.526    | 257370  | 7337   | 5.284   |
| 2     | 23.495    | 4613783 | 87056  | 94.716  |
| Total |           | 4871152 |        | 100.000 |

# $^1\text{H}$ , $^{13}\text{C}$ NMR of compound **3ac**

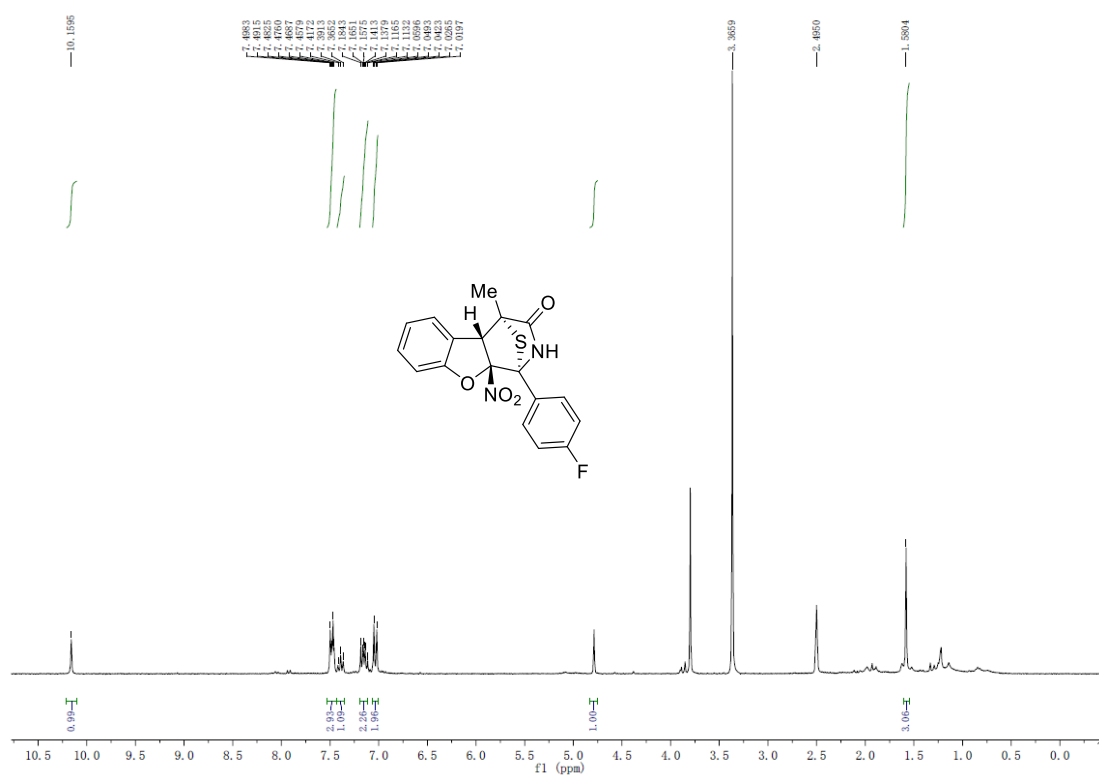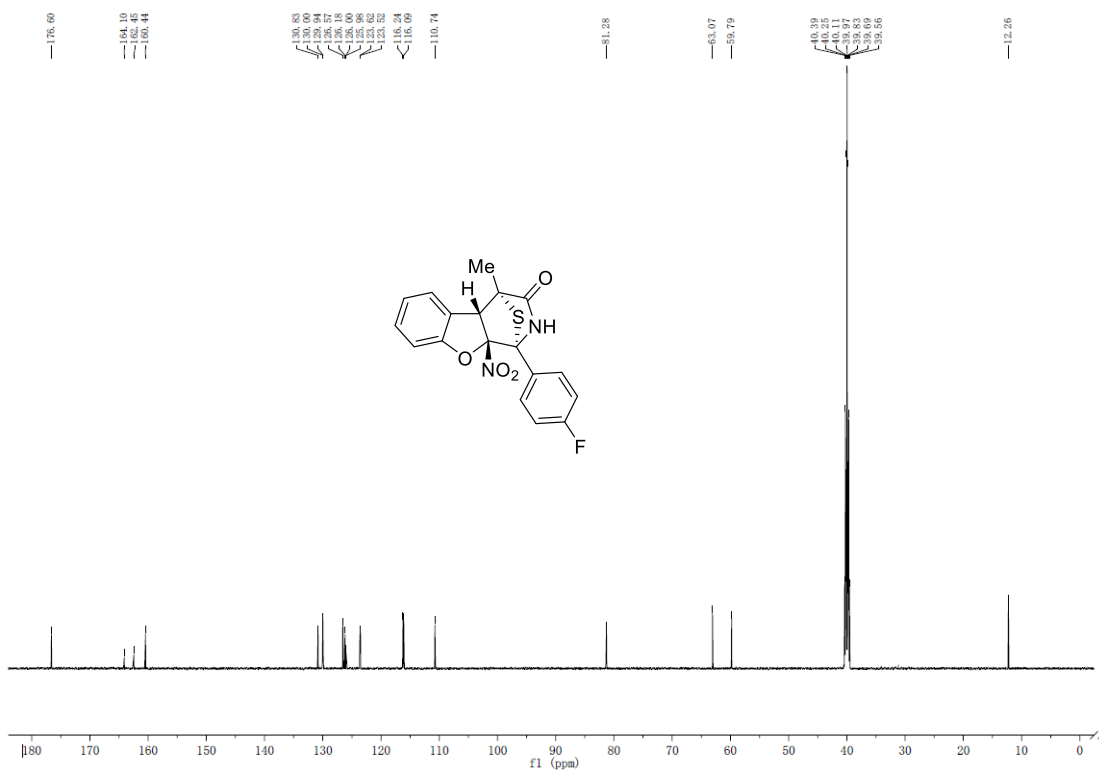

### HPLC of compound 3ac

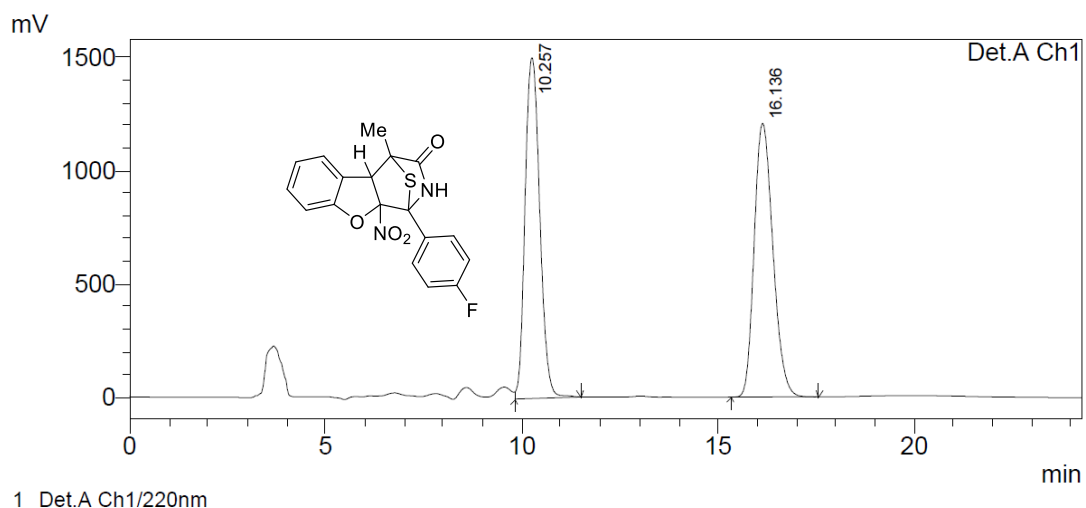

PeakTable

Detector A Ch1 220nm

| Peak# | Ret. Time | Area     | Height  | Area %  |
|-------|-----------|----------|---------|---------|
| 1     | 10.257    | 39219369 | 1504184 | 49.446  |
| 2     | 16.136    | 40098282 | 1208044 | 50.554  |
| Total |           | 79317652 |         | 100.000 |

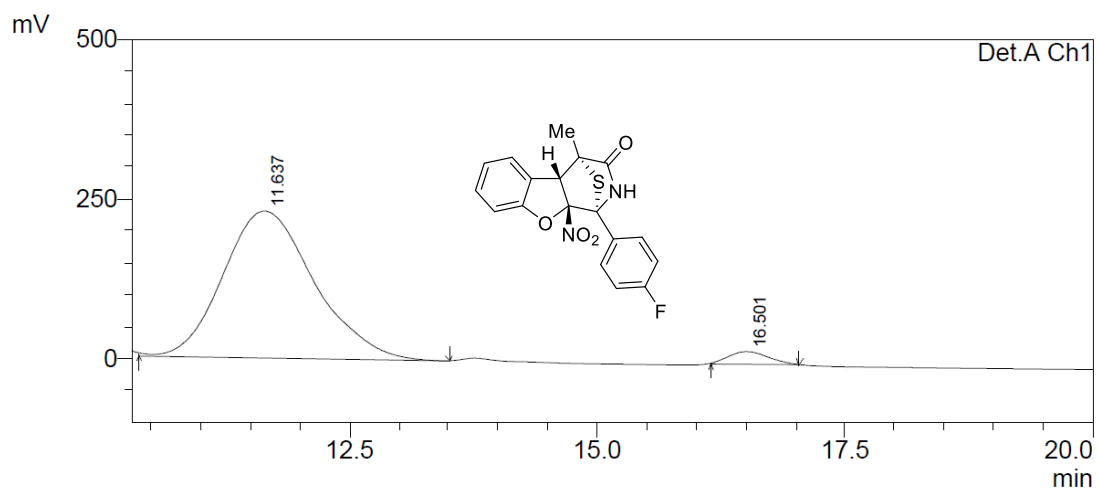

PeakTable

Detector A Ch1 220nm

| Peak# | Ret. Time | Area     | Height | Area %  |
|-------|-----------|----------|--------|---------|
| 1     | 11.637    | 14736811 | 230007 | 96.405  |
| 2     | 16.501    | 549513   | 19658  | 3.595   |
| Total |           | 15286323 |        | 100.000 |





### HPLC of compound 3ad

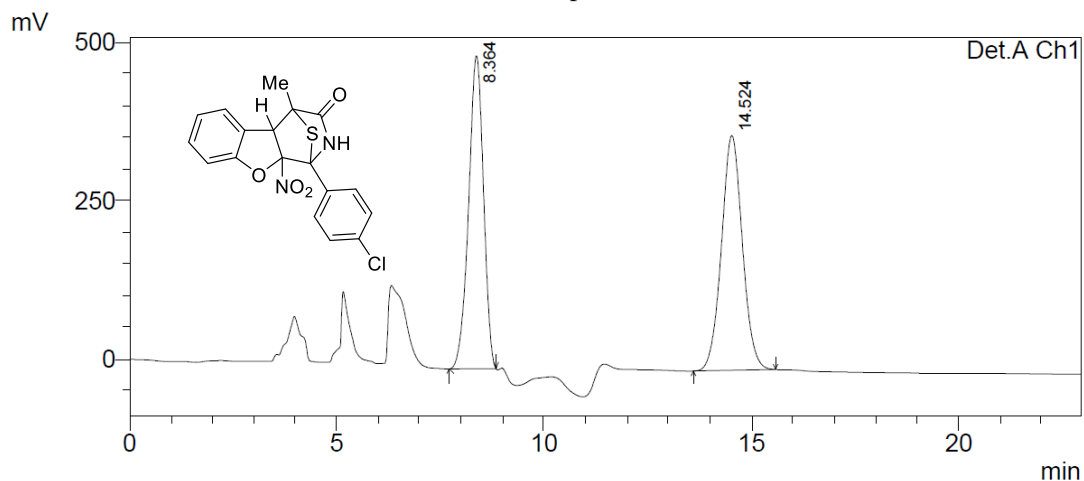

PeakTable

Detector A Ch1 220nm

| Peak# | Ret. Time | Area     | Height | Area %  |
|-------|-----------|----------|--------|---------|
| 1     | 8.364     | 12324406 | 493928 | 48.628  |
| 2     | 14.524    | 13019776 | 370267 | 51.372  |
| Total |           | 25344182 |        | 100.000 |

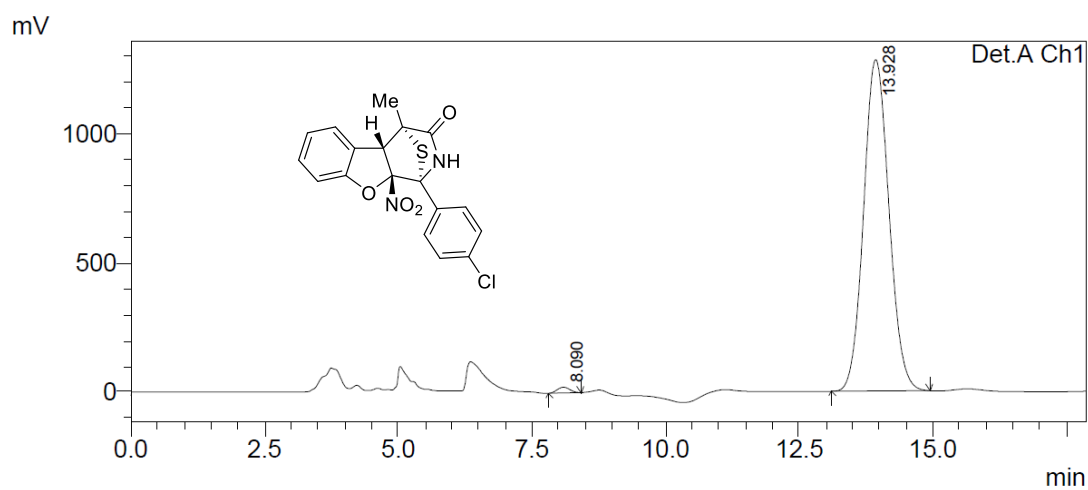

PeakTable

Detector A Ch1 220nm

| Peak# | Ret. Time | Area     | Height  | Area %  |
|-------|-----------|----------|---------|---------|
| 1     | 8.090     | 363138   | 22328   | 0.848   |
| 2     | 13.928    | 42474636 | 1286107 | 99.152  |
| Total |           | 42837774 |         | 100.000 |

# $^1\text{H}$ , $^{13}\text{C}$ NMR of compound **3ae**

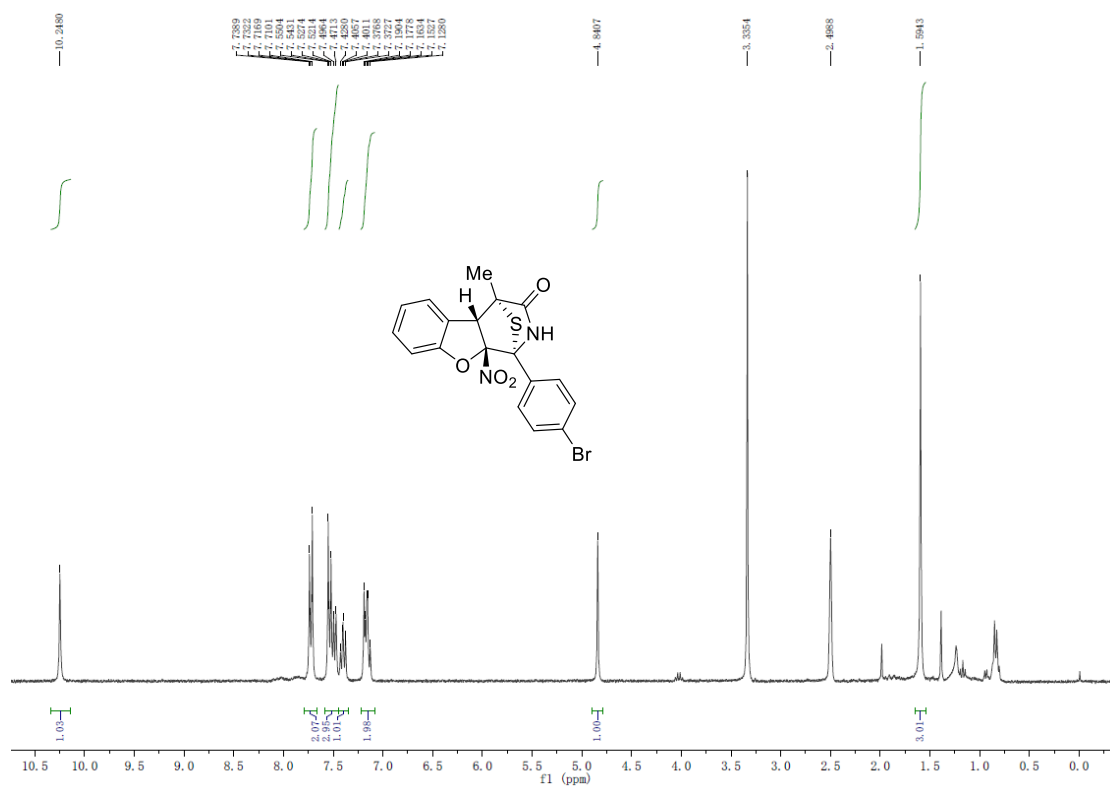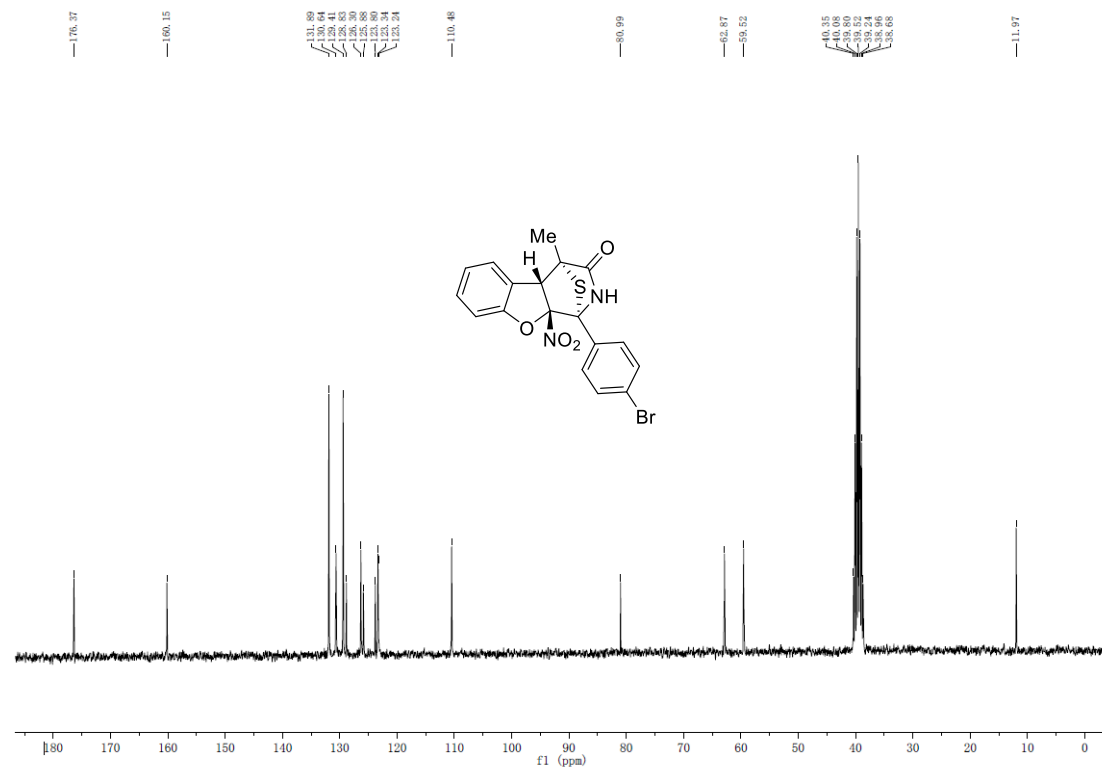

### HPLC of compound 3ae

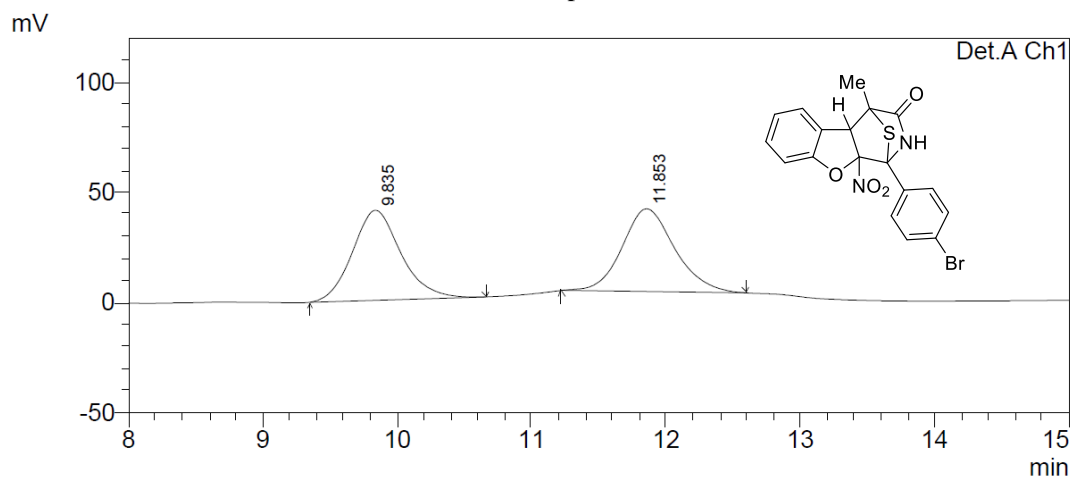

PeakTable

Detector A Ch1 220nm

| Peak# | Ret. Time | Area    | Height | Area %  |
|-------|-----------|---------|--------|---------|
| 1     | 9.835     | 1023749 | 40819  | 50.008  |
| 2     | 11.853    | 1023417 | 37535  | 49.992  |
| Total |           | 2047165 |        | 100.000 |

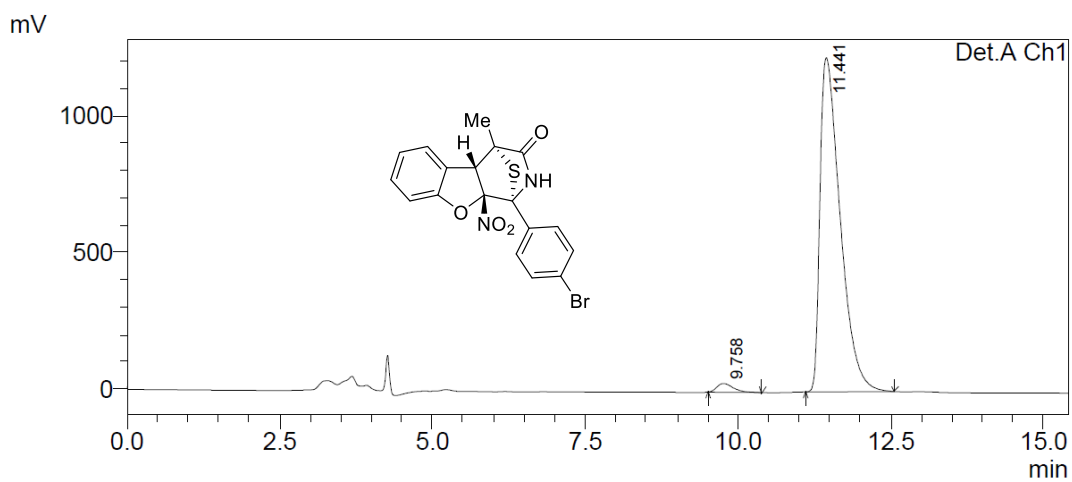

PeakTable

Detector A Ch1 220nm

| Peak# | Ret. Time | Area     | Height  | Area %  |
|-------|-----------|----------|---------|---------|
| 1     | 9.758     | 598887   | 32120   | 2.086   |
| 2     | 11.441    | 28108410 | 1221375 | 97.914  |
| Total |           | 28707297 |         | 100.000 |

$^1\text{H}$ ,  $^{13}\text{C}$  NMR of compound **3af**

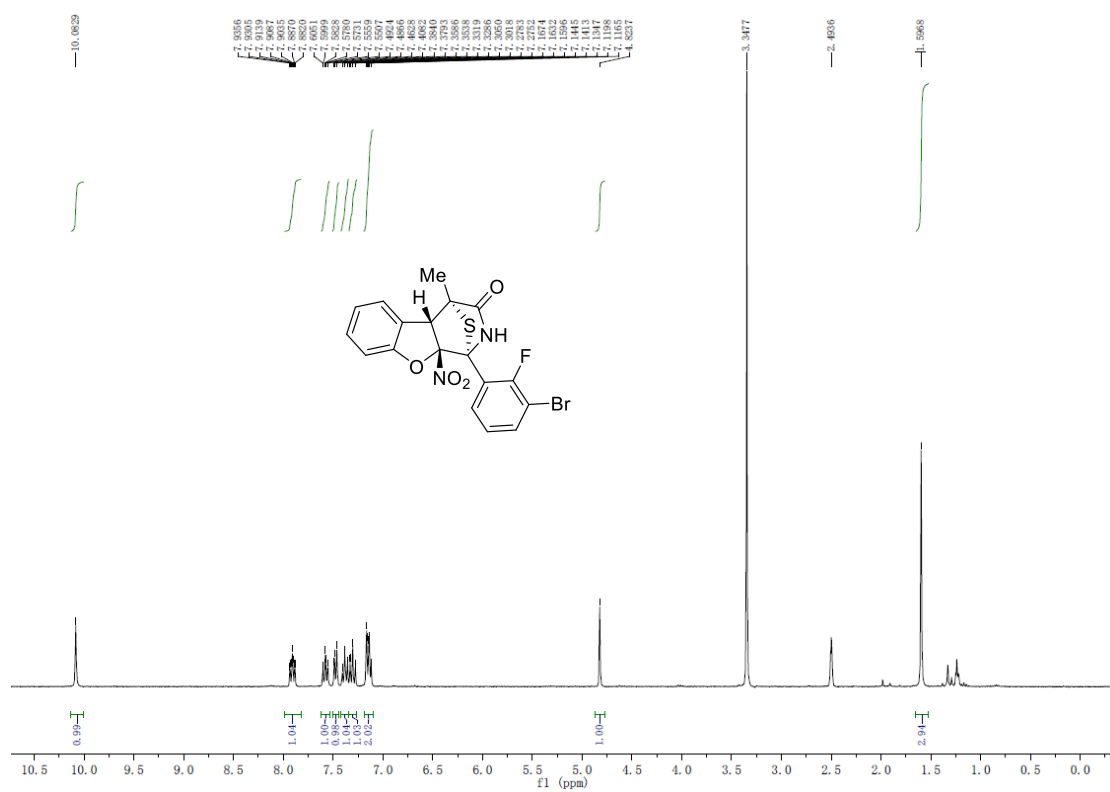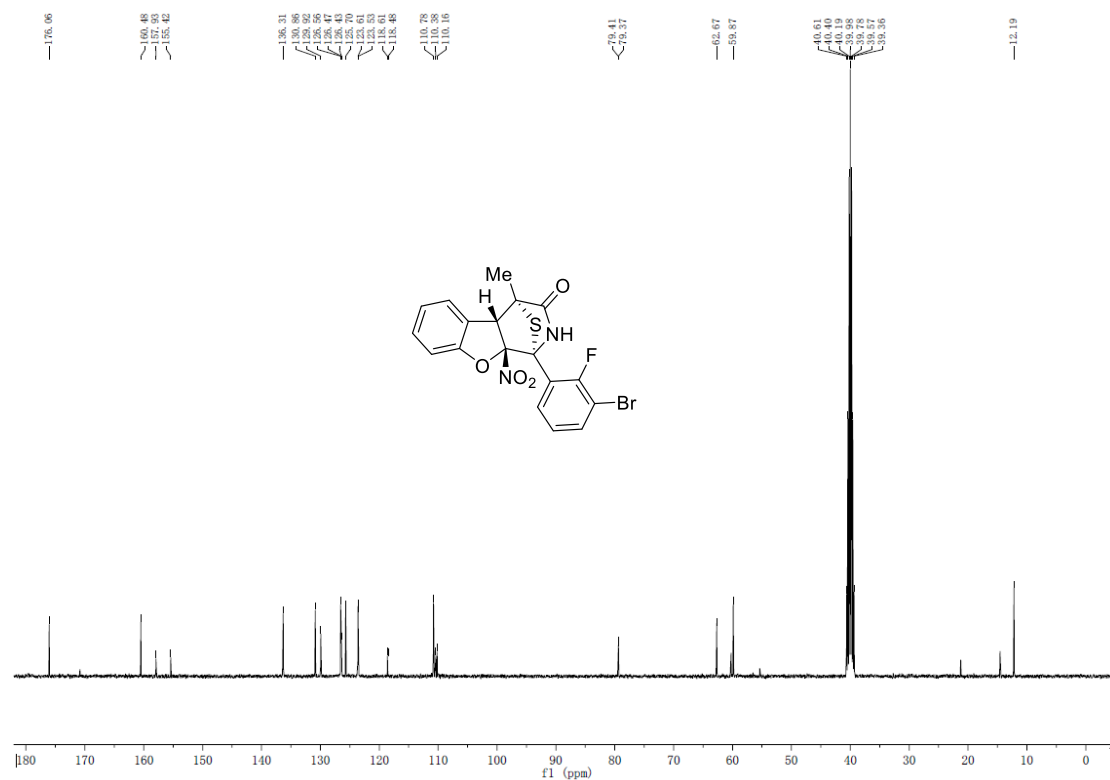

### HPLC of compound 3af

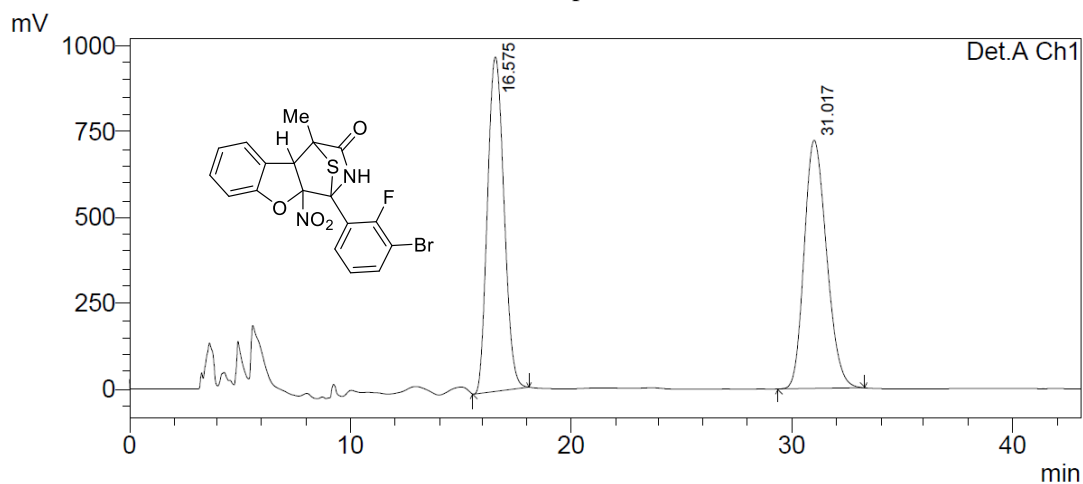

PeakTable

Detector A Ch1 220nm

| Peak# | Ret. Time | Area      | Height | Area %  |
|-------|-----------|-----------|--------|---------|
| 1     | 16.575    | 50628160  | 974487 | 49.798  |
| 2     | 31.017    | 51038156  | 723237 | 50.202  |
| Total |           | 101666316 |        | 100.000 |

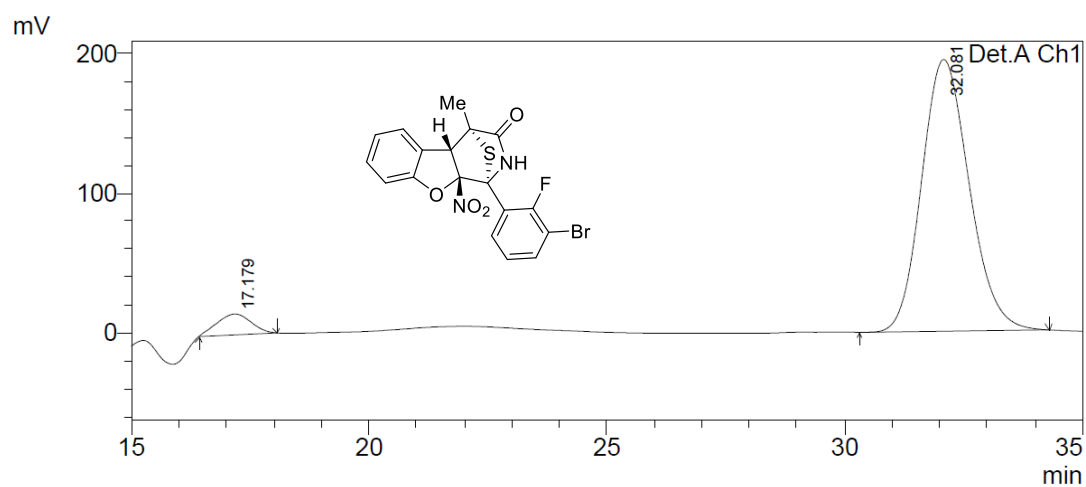

PeakTable

Detector A Ch1 220nm

| Peak# | Ret. Time | Area     | Height | Area %  |
|-------|-----------|----------|--------|---------|
| 1     | 17.179    | 745090   | 14887  | 5.218   |
| 2     | 32.081    | 13533873 | 194676 | 94.782  |
| Total |           | 14278963 |        | 100.000 |

# $^1\text{H}$ , $^{13}\text{C}$ NMR of compound **3ag**

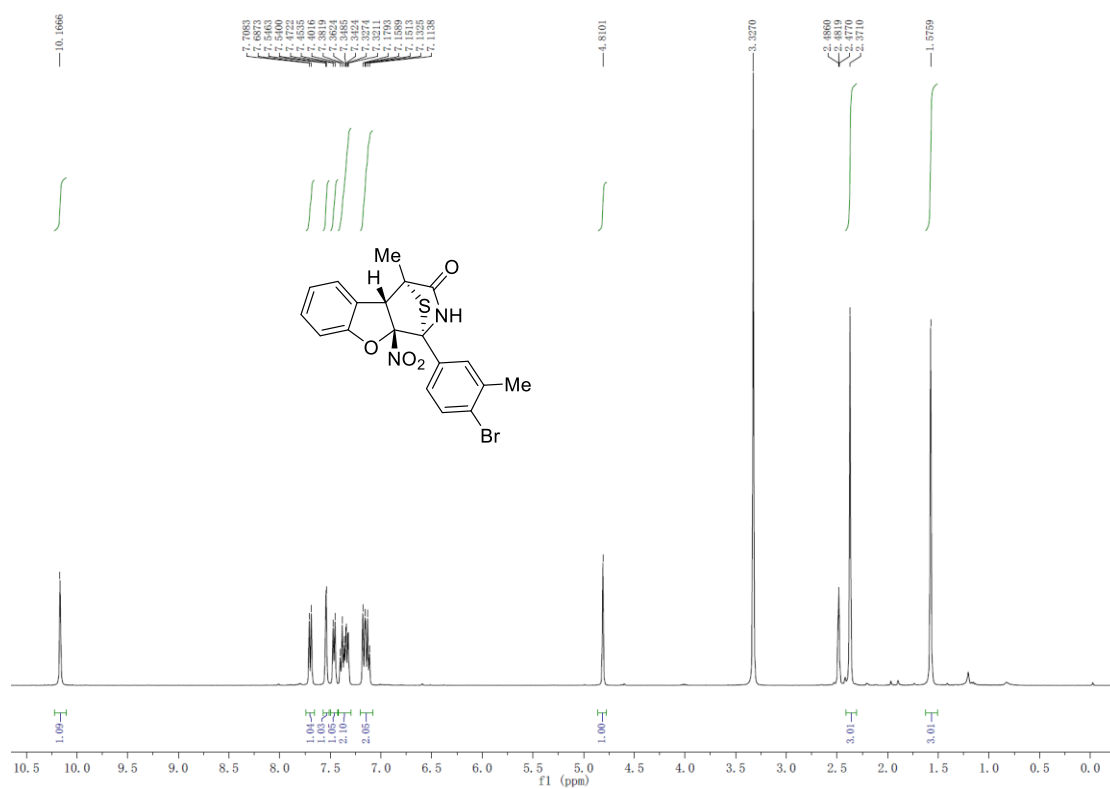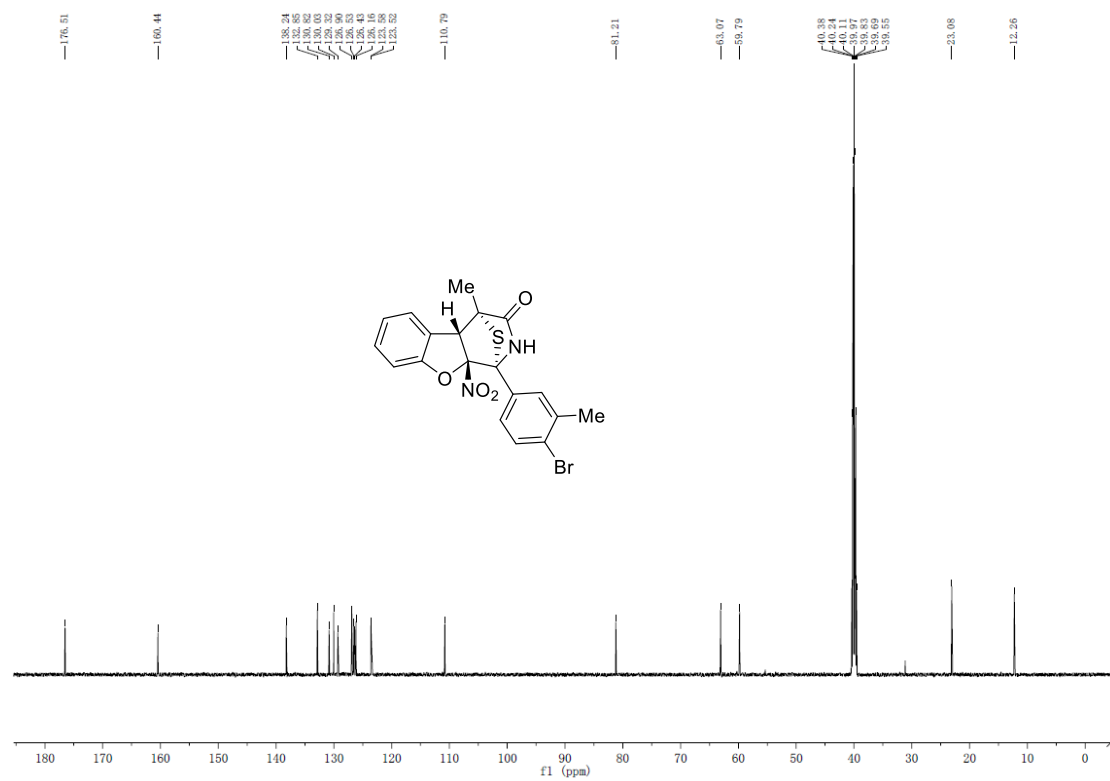

### HPLC of compound **3ag**

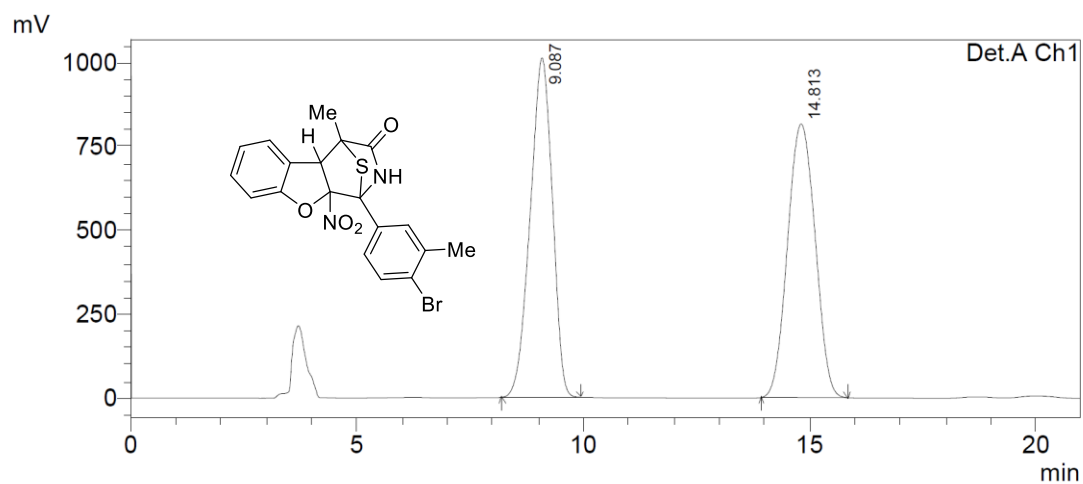

PeakTable

Detector A Ch1 220nm

| Peak# | Ret. Time | Area     | Height  | Area %  |
|-------|-----------|----------|---------|---------|
| 1     | 9.087     | 34518577 | 1011405 | 49.949  |
| 2     | 14.813    | 34589729 | 815256  | 50.051  |
| Total |           | 69108306 |         | 100.000 |

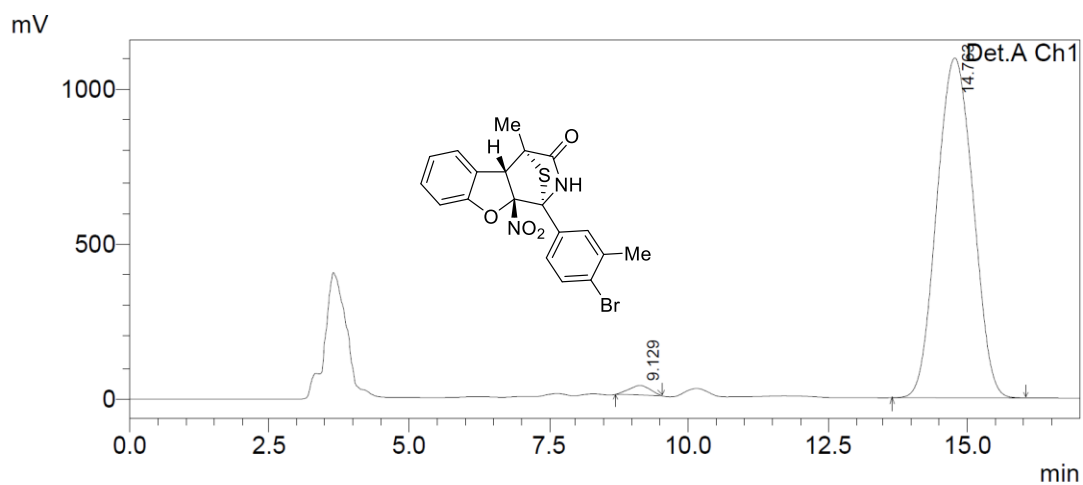

PeakTable

Detector A Ch1 220nm

| Peak# | Ret. Time | Area     | Height  | Area %  |
|-------|-----------|----------|---------|---------|
| 1     | 9.129     | 822680   | 31088   | 1.631   |
| 2     | 14.763    | 49627395 | 1098111 | 98.369  |
| Total |           | 50450075 |         | 100.000 |

# $^1\text{H}$ , $^{13}\text{C}$ NMR of compound **3ah**

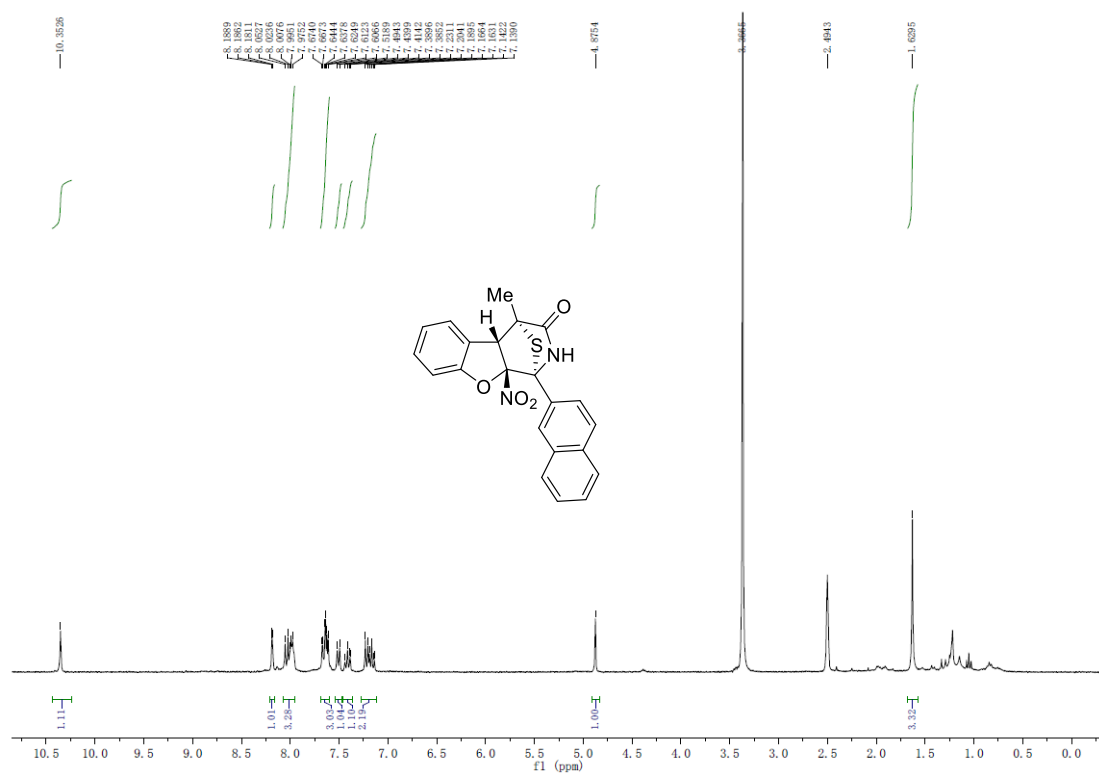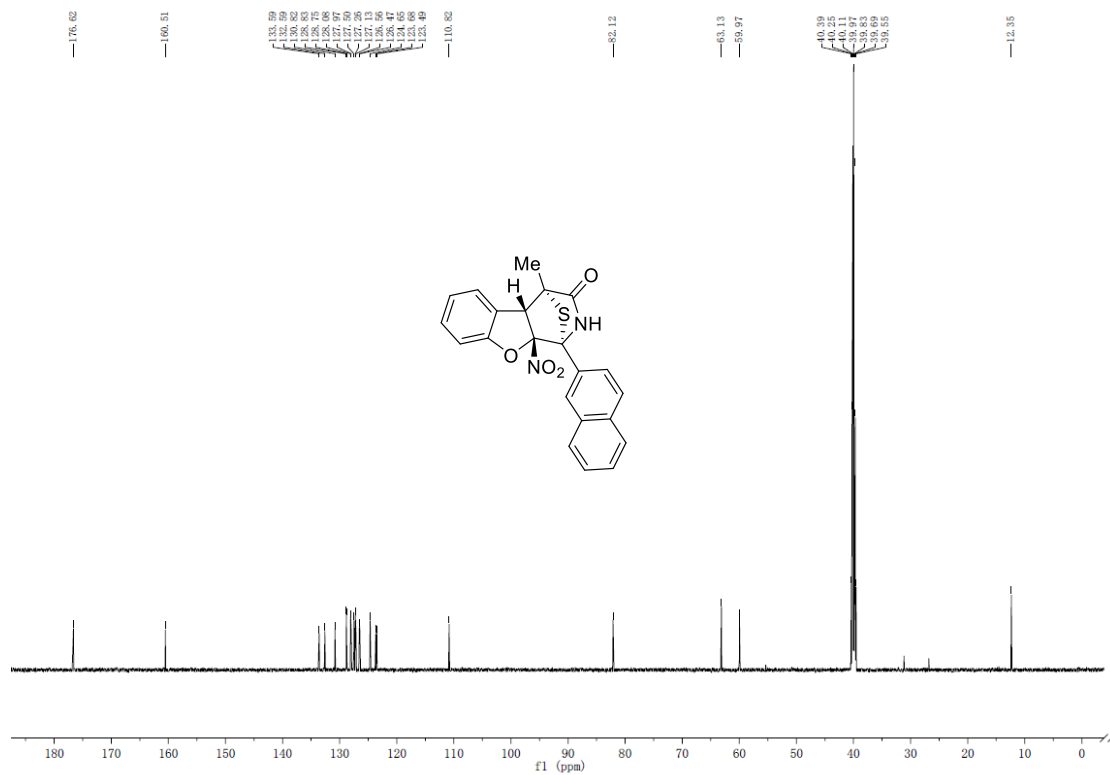



### HPLC of compound 3ah

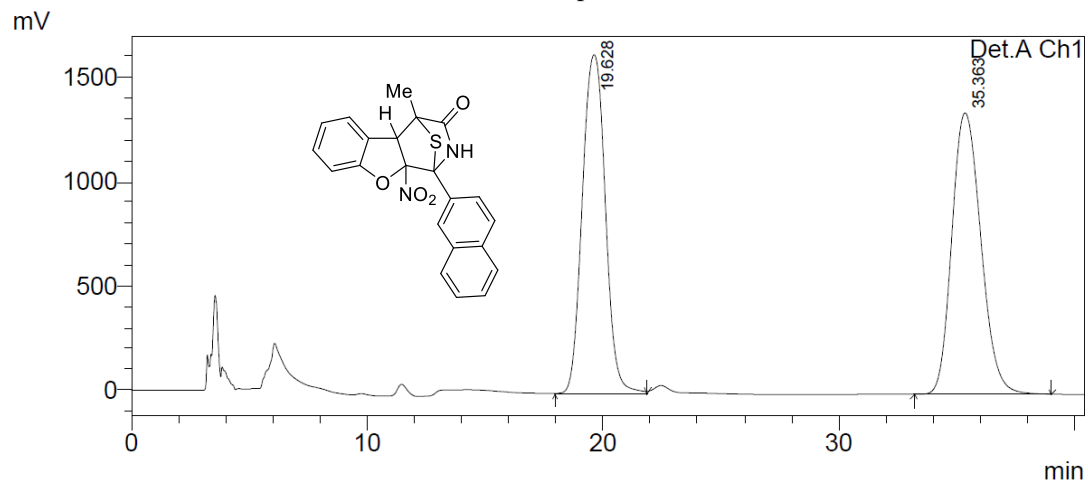

1 Det.A Ch1/220nm

PeakTable

Detector A Ch1 220nm

| Peak# | Ret. Time | Area      | Height  | Area %  |
|-------|-----------|-----------|---------|---------|
| 1     | 19.628    | 110425732 | 1623035 | 48.877  |
| 2     | 35.363    | 115497798 | 1347961 | 51.123  |
| Total |           | 225923530 |         | 100.000 |

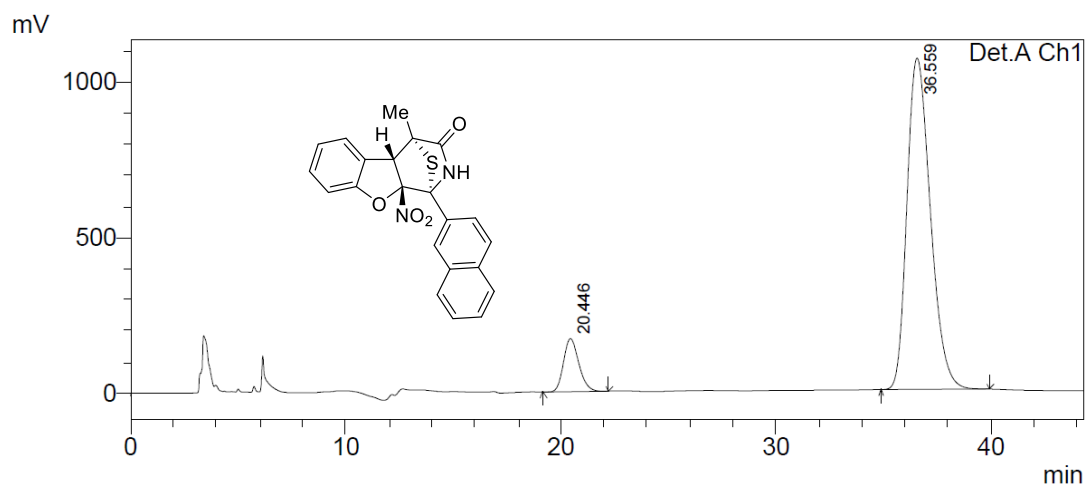

1 Det.A Ch1/220nm

PeakTable

Detector A Ch1 220nm

| Peak# | Ret. Time | Area     | Height  | Area %  |
|-------|-----------|----------|---------|---------|
| 1     | 20.446    | 8381733  | 170325  | 9.418   |
| 2     | 36.559    | 80612750 | 1063935 | 90.582  |
| Total |           | 88994483 |         | 100.000 |

$^1\text{H}$ ,  $^{13}\text{C}$  NMR of compound **3ai**

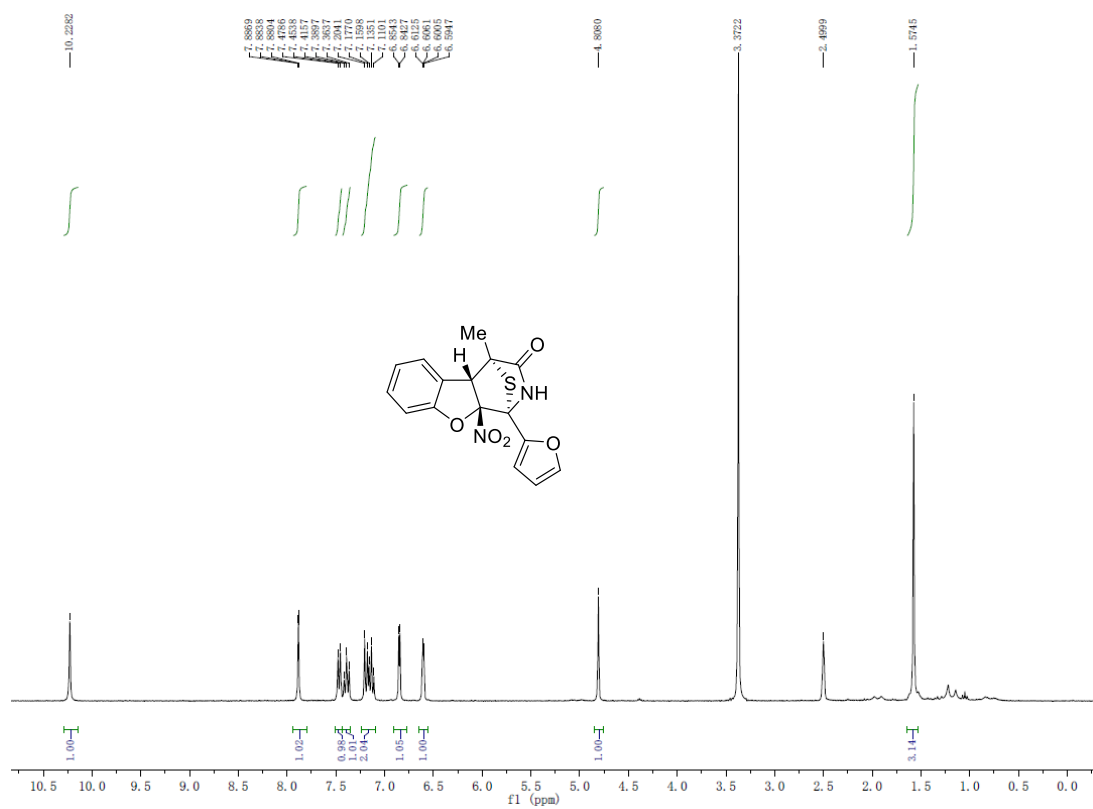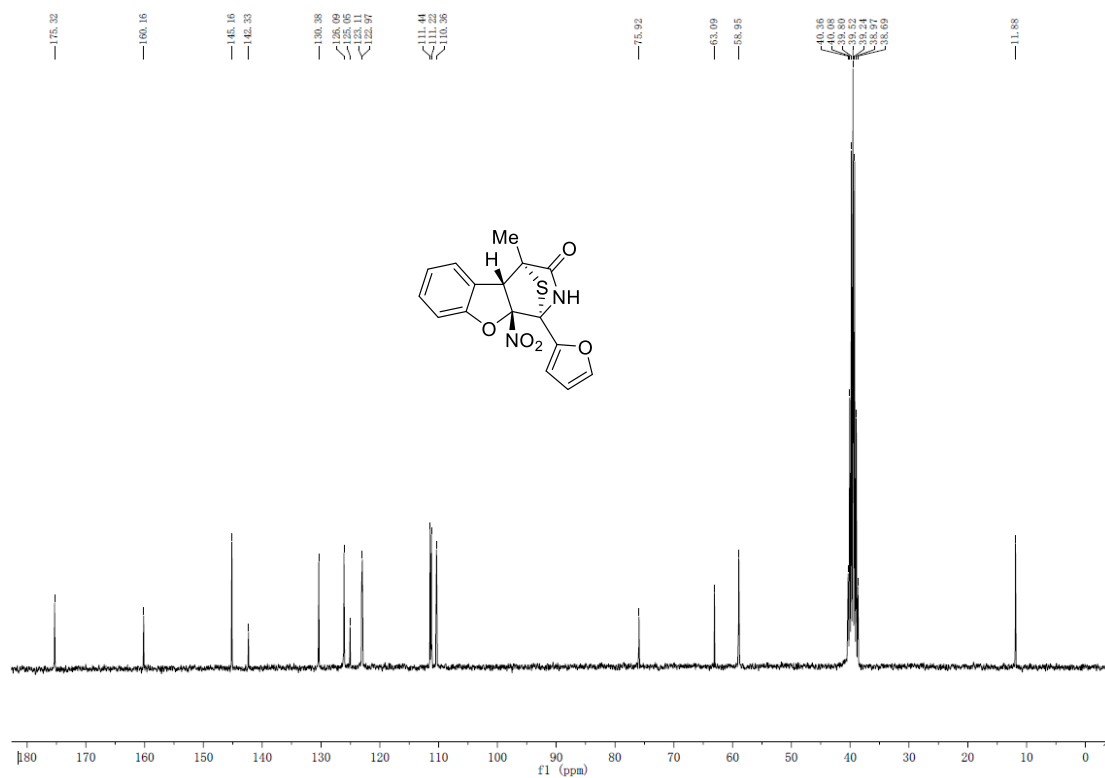

### HPLC of compound 3ai

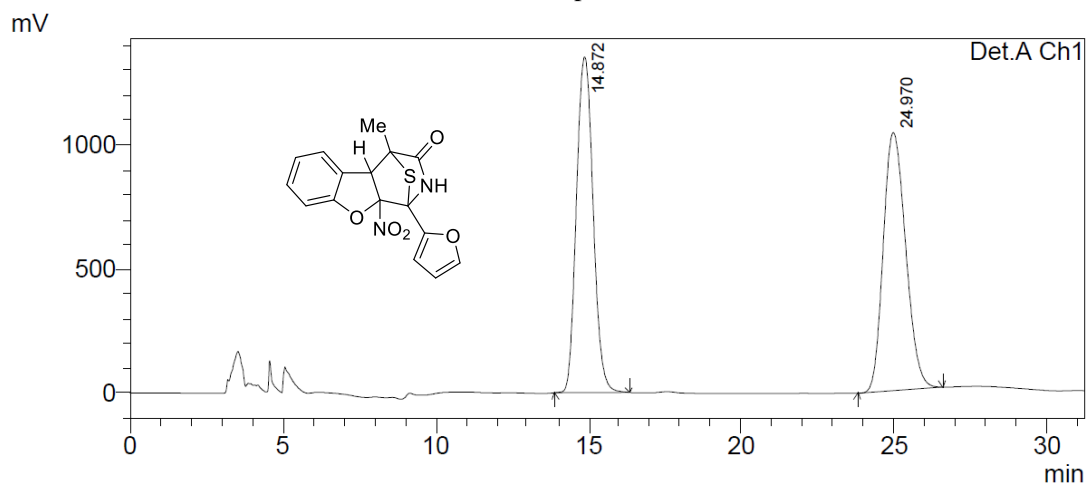

PeakTable

Detector A Ch1 220nm

| Peak# | Ret. Time | Area      | Height  | Area %  |
|-------|-----------|-----------|---------|---------|
| 1     | 14.872    | 51477173  | 1353387 | 49.212  |
| 2     | 24.970    | 53126465  | 1041020 | 50.788  |
| Total |           | 104603638 |         | 100.000 |

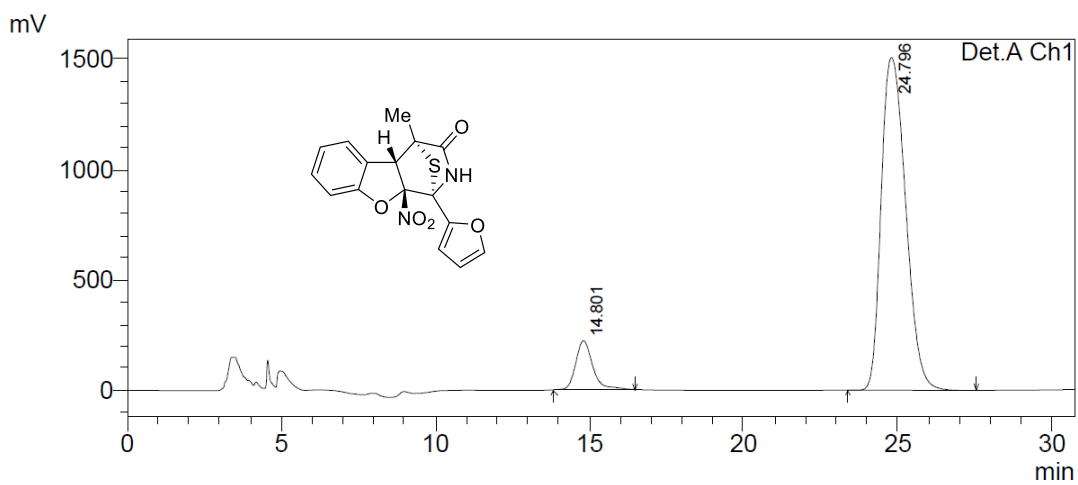

PeakTable

Detector A Ch1 220nm

| Peak# | Ret. Time | Area     | Height  | Area %  |
|-------|-----------|----------|---------|---------|
| 1     | 14.801    | 8492728  | 221891  | 9.265   |
| 2     | 24.796    | 83169493 | 1507561 | 90.735  |
| Total |           | 91662221 |         | 100.000 |



### HPLC of compound 3aj

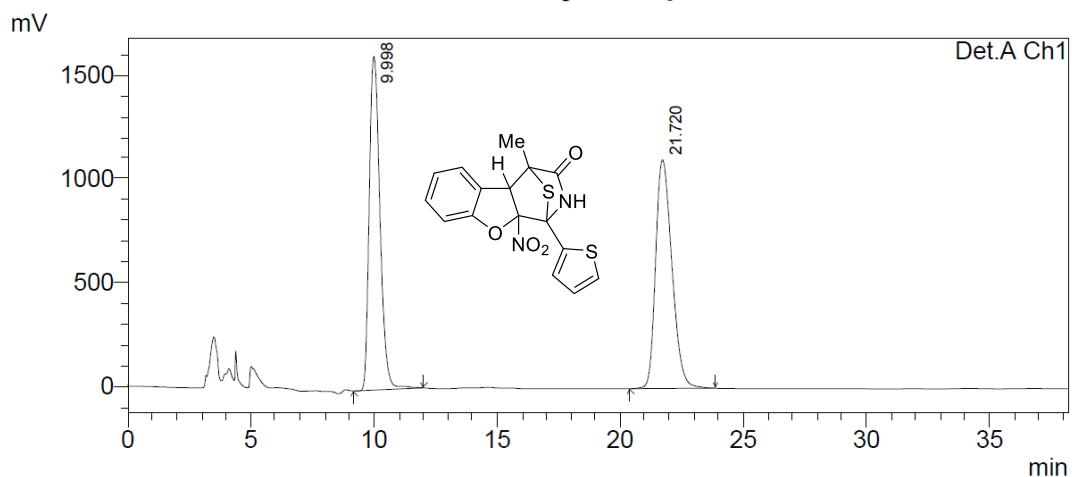

1 Det.A Ch1/220nm

PeakTable

Detector A Ch1 220nm

| Peak# | Ret. Time | Area     | Height  | Area %  |
|-------|-----------|----------|---------|---------|
| 1     | 9.998     | 48776592 | 1610640 | 48.996  |
| 2     | 21.720    | 50775385 | 1103711 | 51.004  |
| Total |           | 99551977 |         | 100.000 |

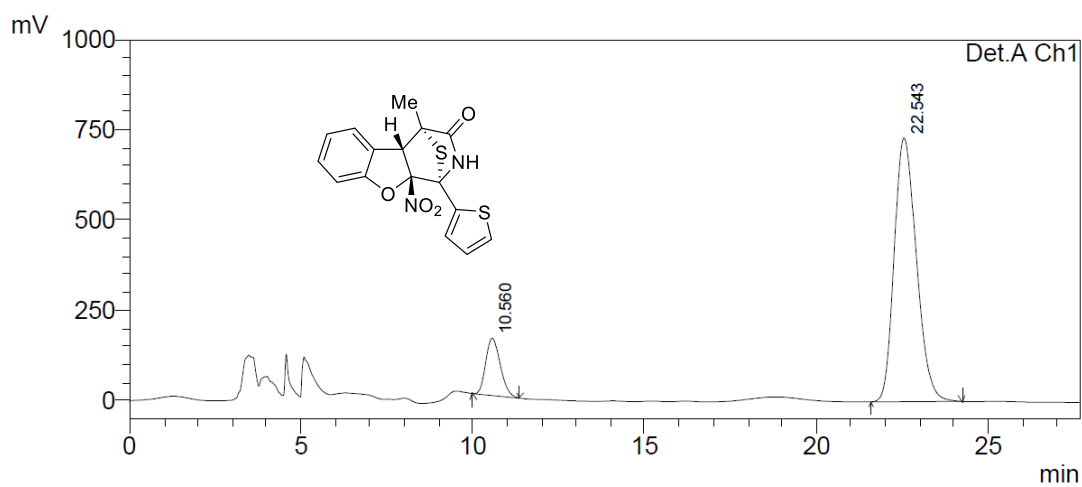

1 Det.A Ch1/220nm

PeakTable

Detector A Ch1 220nm

| Peak# | Ret. Time | Area     | Height | Area %  |
|-------|-----------|----------|--------|---------|
| 1     | 10.560    | 4671593  | 158796 | 12.444  |
| 2     | 22.543    | 32870574 | 730194 | 87.556  |
| Total |           | 37542168 |        | 100.000 |



### HPLC of compound 3ak

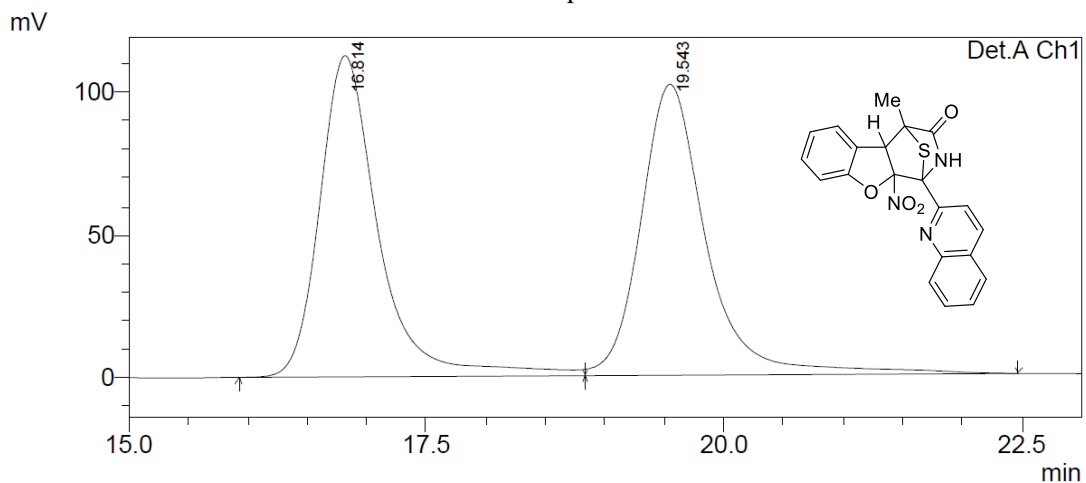

PeakTable

Detector A Ch1 254nm

| Peak# | Ret. Time | Area    | Height | Area %  |
|-------|-----------|---------|--------|---------|
| 1     | 16.814    | 3873402 | 112487 | 49.680  |
| 2     | 19.543    | 3923259 | 101872 | 50.320  |
| Total |           | 7796661 |        | 100.000 |

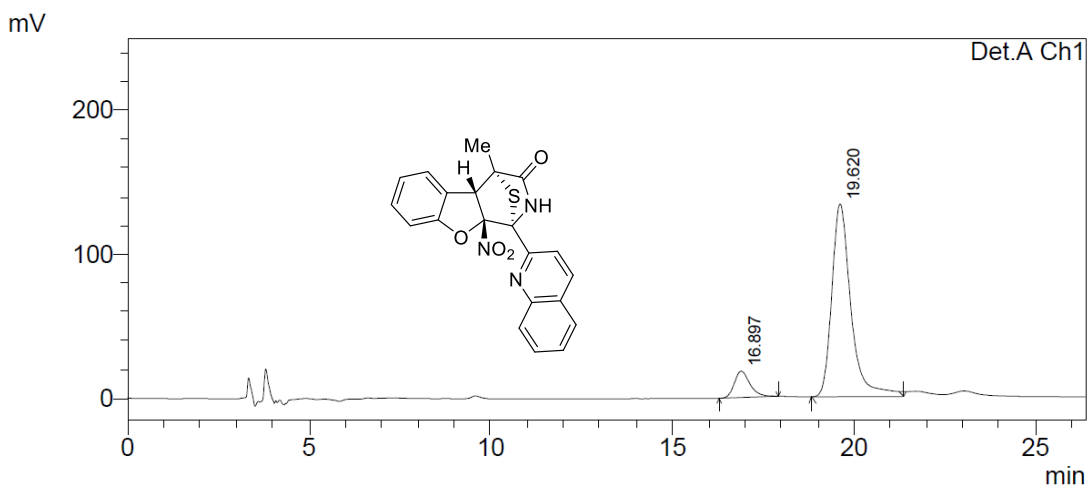

PeakTable

Detector A Ch1 254nm

| Peak# | Ret. Time | Area    | Height | Area %  |
|-------|-----------|---------|--------|---------|
| 1     | 16.897    | 548730  | 18366  | 10.040  |
| 2     | 19.620    | 4916898 | 133693 | 89.960  |
| Total |           | 5465629 |        | 100.000 |

# $^1\text{H}$ , $^{13}\text{C}$ NMR of compound **3al**

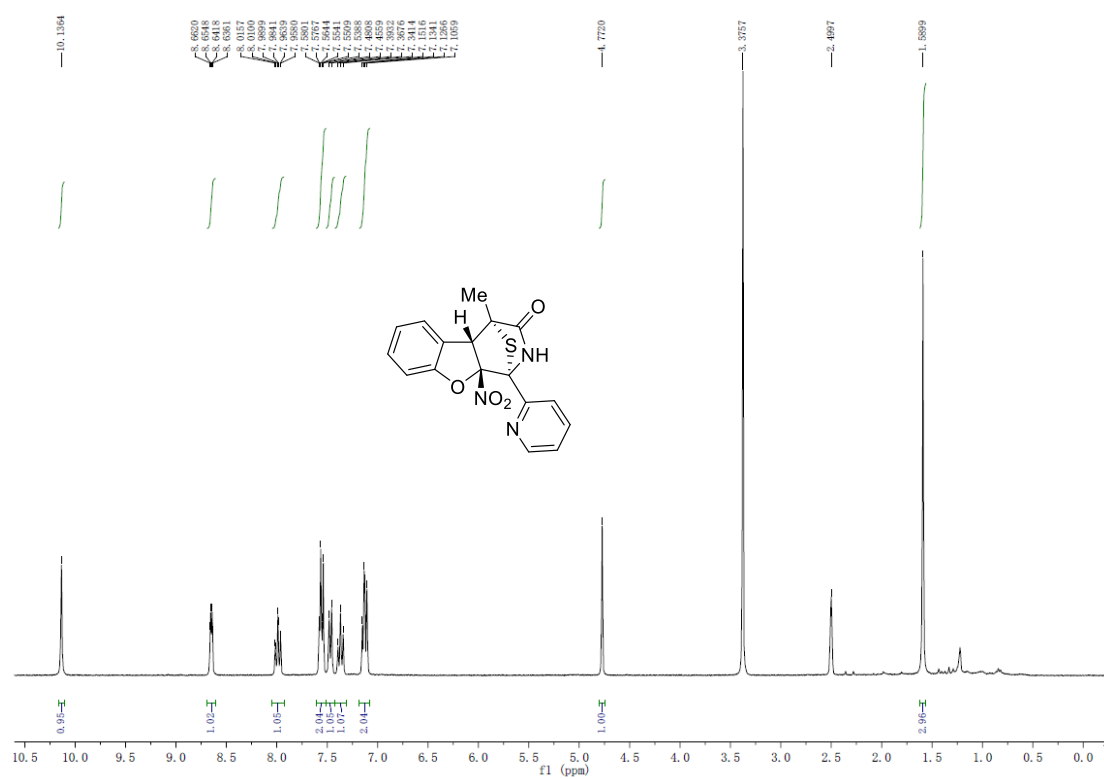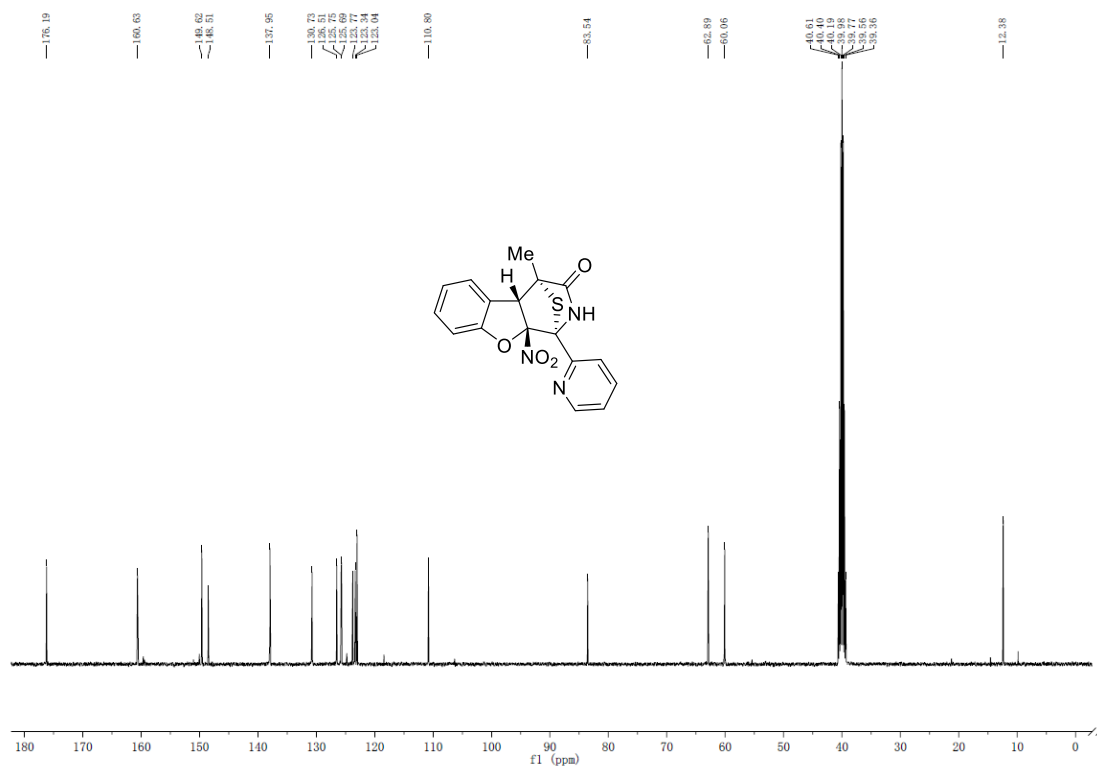



### HPLC of compound 3al

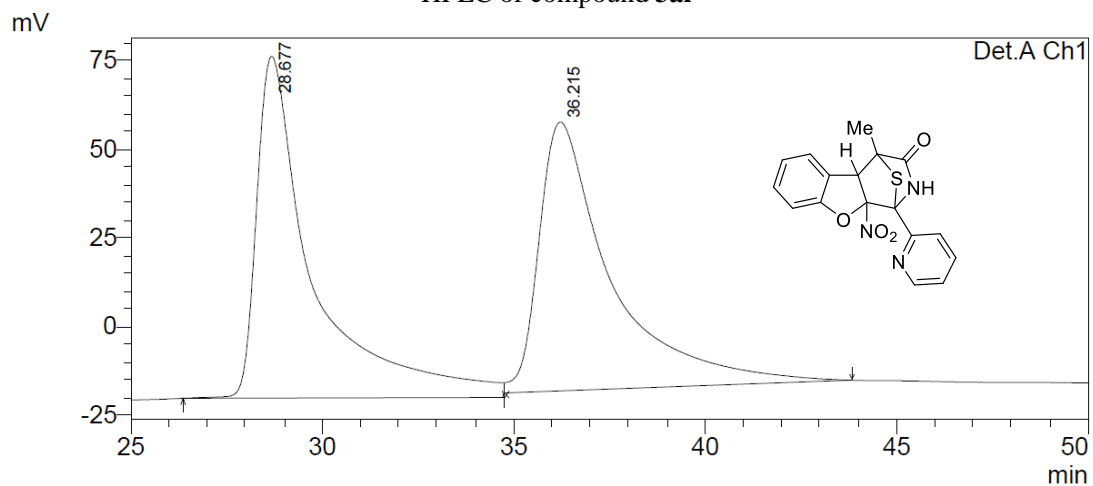

1 Det.A Ch1/220nm

PeakTable

Detector A Ch1 220nm

| Peak# | Ret. Time | Area     | Height | Area %  |
|-------|-----------|----------|--------|---------|
| 1     | 28.677    | 9882747  | 96318  | 49.785  |
| 2     | 36.215    | 9967958  | 75823  | 50.215  |
| Total |           | 19850705 |        | 100.000 |

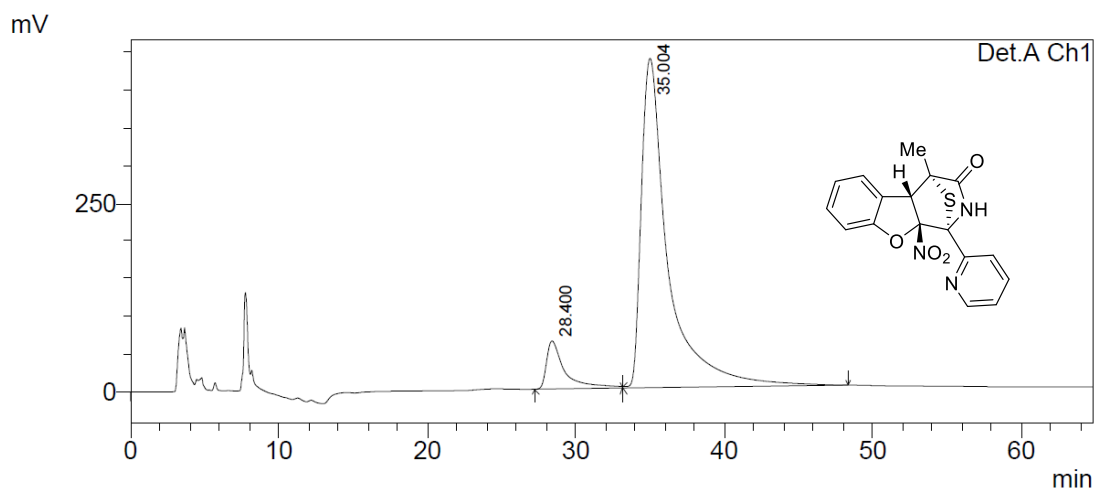

1 Det.A Ch1/220nm

PeakTable

Detector A Ch1 220nm

| Peak# | Ret. Time | Area     | Height | Area %  |
|-------|-----------|----------|--------|---------|
| 1     | 28.400    | 5476164  | 63621  | 9.092   |
| 2     | 35.004    | 54757652 | 436443 | 90.908  |
| Total |           | 60233816 |        | 100.000 |
